# Supplementary material
Source: publisher figshare collection journal article supplement (https://springernature.figshare.com/ndownloader/files/13564328)
Supplement: Supplementary file 1 [file 13564328]

mnemonic,year,X1_1_6_6_1,X1_1_7_6_1,X1_1_7_4_1,X1_1_9_3_1,X1_1_6_5_1,X1_1_7_2_1,X1_1_7_3_1,X2_2_1_1_1,X1_1_8_4_1,X1_1_4_6_1,X1_1_5_2_1,X1_2_1_1_1,X1_1_7_1_1,X1_2_2_2_1,X1_1_8_3_1,X1_1_8_5_1,X1_1_4_5_1,X1_1_9_1_1,X1_2_2_1_1,X1_1_1_2_2,X1_1_1_5_1,X1_1_4_2_1,X1_1_1_2_1,X1_1_7_7_1,X1_1_3_4_1,X1_1_2_5_1,X1_1_3_2_1,X1_1_2_1_1,X1_1_9_2_1,X1_1_2_6_1,X1_1_8_6_1,X1_1_6_3_1,X1_2_1_2_1,X1_1_2_4_1,X1_1_7_8_1,X1_1_6_2_1,X2_1_2_1_1,X1_1_2_5_2,X1_1_4_7_1,X1_1_4_3_1,X1_1_2_2_1,X1_1_8_1_1,X1_1_3_1_1,X2_1_1_1_1,X1_1_1_4_2,X1_1_6_1_1,X1_1_6_8_1,X1_2_2_3_1,X1_1_6_7_1,X1_1_4_4_1,X1_1_1_3_1,X1_1_1_4_1,X1_1_9_4_1,X2_1_3_1_1,X1_1_4_1_1,X1_1_2_3_1,X1_1_8_2_1,X1_1_5_3_1,X2_1_2_2_1,X1_1_3_3_1,X2_1_2_1_2,X1_1_5_1_1,X2_2_1_3_1,X1_1_6_9_1,X1_1_1_1_1,X1_1_5_4_1,X1_1_6_4_1,X2_1_2_1_3,X1_1_5_5_1,X1_1_2_7_1,X1_1_7_5_1,X1_2_1_3_1,X1_1_2_5_3,X1_2_2_4_1,X2_1_2_1_4,X2_2_1_2_1,X11_1_1_1_18,X11_1_1_1_12,X11_1_1_1_1,X11_1_1_1_13,X11_1_1_2_6,X11_1_1_2_4,X11_1_1_2_7,X11_1_2_1_3,X11_1_1_2_8,X11_1_1_1_6,X11_1_1_1_4,X11_1_1_1_17,X11_1_1_2_2,X11_1_1_1_15,X11_1_1_1_5,X11_1_1_1_7c,X11_1_2_1_2c,X11_1_1_1_11c,X11_1_1_1_10c,X11_1_1_1_9c,X11_1_1_2_1,X11_1_1_2_5,X11_1_1_1_19,X11_1_1_1_14,X11_1_1_1_8c,X11_1_1_1_2,X11_1_1_2_11,X11_1_1_2_3,X11_1_1_1_3,X11_1_1_1_16
E06000001,2014,0.510928509,0.575870493,0.588091911,0.302998719,0.174557587,0.163913766,0.577490225,1.574868102,0.302994516,0.372599099,0.20541421,0.344487685,0.358417381,0.818613531,0.799576683,0.25222301,0.80199689,0.017528081,0.123207487,0.913680632,1.002509325,0.742583471,1.091906645,0.331330017,0.471600768,0.386987741,0.12506966,0.88294736,0.07428149,2.238144718,0.070212685,0.235532225,0.218765997,0.976267282,0.695221794,0.19498975,1.368775252,0.443255406,0.291314195,0.080155455,0.313333034,0.110082898,0.326817211,0.717223445,0.333567779,0.216587849,0.293056825,0.43508422,0.150823595,0.454213087,0.170077708,0.627644054,0.024499438,0.692507092,0.160491264,0.256467028,0.121948623,0.056124964,0.166235451,0.11725088,0.069732496,0.211641514,0.385655362,0.059001183,0.157396094,0.05543786,0.059576706,0.164611996,0.010325965,0.011629703,0.011946825,0.046940253,0.042987507,0.005047384,0.025806516,0.024865337,1.502666864,0.342202878,6.347888467,0.681913854,0.371786759,0.182445598,1.704104109,0.352545263,0.087578724,0.170435431,0.070636717,0.053991105,0.06861269,0.135687589,0.485369947,0.036168775,0.084533726,0.046507265,0.061474636,0.073954311,0.025823994,0.061093255,0.030815063,0.010858557,0.011379763,0.006746697,0.099113235,0.018275773,0.026553634,0.008196593
E06000002,2014,0.462478376,0.533170698,0.549266169,0.276720133,0.165245578,0.151652466,0.555726144,1.440915411,0.285418099,0.343863724,0.189365036,0.304236462,0.338676544,0.789068783,0.741594647,0.233999675,0.740475054,0.014904398,0.121411643,0.847893862,0.943611483,0.683932847,1.010654541,0.298428473,0.435370748,0.349661326,0.11776386,0.785842441,0.079073681,2.002019616,0.066337009,0.222881968,0.199545397,0.929402609,0.642982297,0.192015917,1.190122599,0.390958489,0.277259105,0.090989578,0.289763225,0.103494426,0.316299081,0.67887191,0.310401455,0.211717356,0.281782373,0.413440111,0.14513129,0.422340499,0.162995088,0.579618198,0.025122646,0.635087065,0.16510018,0.263150026,0.111635659,0.053298157,0.1410541,0.103639541,0.064530792,0.190672452,0.370170059,0.05538252,0.17048239,0.059118023,0.056940038,0.150853054,0.008931246,0.011785075,0.014760162,0.041720556,0.041462022,0.004740403,0.024045038,0.024324267,1.408723943,0.34042699,5.916986044,0.602913291,0.358905376,0.185042425,1.64857532,0.363932178,0.088771095,0.157927863,0.070655419,0.047761069,0.06933006,0.129621993,0.470281861,0.037611036,0.08713422,0.047554205,0.062732656,0.075155014,0.025559773,0.057201821,0.026590289,0.008725855,0.011946749,0.00682477,0.09226775,0.017011845,0.024470205,0.00759927
E06000003,2014,0.539615543,0.594009878,0.606232149,0.311811603,0.184823957,0.171787607,0.600615862,1.575882474,0.304146047,0.386115977,0.213338641,0.362149155,0.374983885,0.815281172,0.830142764,0.257703676,0.83423646,0.018030284,0.123127781,0.946136297,1.024105395,0.767256599,1.118762581,0.345497691,0.495022921,0.402636232,0.135770399,0.92162172,0.075845906,2.312328661,0.068129434,0.244085872,0.227172446,0.998539095,0.698476911,0.201505178,1.481664132,0.459548339,0.299885179,0.072625256,0.326587267,0.11217011,0.349370764,0.756675202,0.344579062,0.226513311,0.309582558,0.440954859,0.156694494,0.478773718,0.169008765,0.650057082,0.023933898,0.716040851,0.157443648,0.265176111,0.1306899,0.058375663,0.177429039,0.12763101,0.074751194,0.22143865,0.353114751,0.063215049,0.15521138,0.05430657,0.064112379,0.169243764,0.010804573,0.012491439,0.011690996,0.048943679,0.046387026,0.005889704,0.027528144,0.029090792,1.580920302,0.357624006,6.734268988,0.745081826,0.387281735,0.182263205,1.709760754,0.371854297,0.088172002,0.173909309,0.072033471,0.058073029,0.069239724,0.142770433,0.491681793,0.03413455,0.079025293,0.043722586,0.057855341,0.0692813,0.026583209,0.061273421,0.033232929,0.012770319,0.010604165,0.007075732,0.102817993,0.01844924,0.029229278,0.009090891
E06000004,2014,0.522660019,0.582862149,0.591037679,0.29990519,0.1776509,0.162579965,0.588587856,1.478727067,0.298185784,0.370745586,0.200188444,0.340501228,0.368027937,0.802738353,0.798251532,0.248291087,0.80848684,0.017447447,0.123428795,0.910560361,1.005109002,0.72636502,1.069018994,0.319637507,0.472368869,0.385927153,0.130008824,0.864016243,0.077356708,2.176070474,0.066761365,0.239174309,0.211783873,0.979284387,0.680653388,0.196909468,1.423631637,0.428715827,0.288425236,0.083291172,0.30397455,0.106607351,0.331946505,0.726942757,0.338238732,0.221751227,0.300783242,0.444759628,0.152977355,0.461699476,0.170523812,0.618170363,0.023917286,0.704387543,0.154222938,0.25409321,0.121964508,0.057522775,0.189041277,0.119657242,0.068892628,0.205629213,0.333111369,0.059080182,0.162558869,0.053820278,0.061320816,0.164878412,0.009890466,0.011761041,0.012630151,0.045976991,0.044682903,0.0052865,0.027214466,0.025217391,1.553717127,0.381862047,6.662397905,0.732877021,0.415563681,0.189177425,1.745270884,0.416828652,0.088449856,0.184804285,0.076049973,0.061392782,0.073032033,0.145091564,0.508573495,0.037018937,0.084838423,0.047059229,0.062272064,0.07460484,0.02788509,0.064603512,0.033633726,0.011750087,0.011603663,0.007368544,0.095463855,0.018038197,0.028392464,0.008384284
E06000005,2014,0.525703226,0.589315807,0.595450685,0.304858924,0.181590907,0.165526149,0.590303791,1.510829433,0.302554339,0.375033816,0.203596583,0.349648195,0.369325452,0.807915068,0.808383659,0.252433395,0.814208136,0.017454503,0.124794976,0.924930414,1.012232839,0.739799242,1.091499314,0.328715462,0.479152509,0.393231434,0.131260006,0.884233899,0.077306922,2.234954608,0.068268042,0.23987637,0.218821456,0.981795348,0.690407615,0.200023503,1.444537609,0.440554327,0.294550827,0.082981034,0.314038171,0.109338722,0.338976602,0.739596266,0.34029242,0.223524723,0.30125962,0.444502023,0.155227133,0.467849845,0.170318291,0.632479176,0.024161006,0.706190305,0.156267203,0.259555316,0.123468342,0.058665631,0.183858198,0.120830631,0.071672994,0.211802164,0.347364295,0.059658486,0.161813021,0.054725912,0.061918107,0.167081111,0.010256106,0.011610923,0.012582185,0.04717078,0.045130934,0.005646794,0.027332421,0.02617248,1.559665561,0.36668644,6.695430386,0.731575153,0.401841348,0.183442796,1.747542446,0.405791369,0.088435246,0.184859042,0.07448875,0.057837753,0.070284989,0.145948615,0.505559652,0.03655666,0.08427499,0.046551983,0.061382543,0.073653964,0.027176999,0.062652691,0.033209685,0.012475755,0.011327808,0.007150394,0.109838855,0.018327041,0.028358272,0.009349291
E06000006,2014,0.516654772,0.583163479,0.586382302,0.301057948,0.171727021,0.162016138,0.579208333,1.567686731,0.299711931,0.370587039,0.200862286,0.351317124,0.36215869,0.81644315,0.807251422,0.248752713,0.808965599,0.017402889,0.122210016,0.912969642,1.001620688,0.731572826,1.088078076,0.330732366,0.467444976,0.391802112,0.131103395,0.890480329,0.074160067,2.217768677,0.06822033,0.236004554,0.216775991,0.977566795,0.685068867,0.194106174,1.395468379,0.437107226,0.289918839,0.079982492,0.314908557,0.107909049,0.332777978,0.726385185,0.342628474,0.214721973,0.292083448,0.437448384,0.151872309,0.456392023,0.170519794,0.620167458,0.023401164,0.695696297,0.155313409,0.251913619,0.120948094,0.05724334,0.174560016,0.118002129,0.068982335,0.209399802,0.362478508,0.0571521,0.157957348,0.053689967,0.05905269,0.17033374,0.009736813,0.011307179,0.011472315,0.046228097,0.042507473,0.005528892,0.025851849,0.026884165,1.552969119,0.369463111,6.458587792,0.709945657,0.397299859,0.18898739,1.739026121,0.397779778,0.08888021,0.180594399,0.074969346,0.053998642,0.070908107,0.142774364,0.502563399,0.037459448,0.086707956,0.047486585,0.063045516,0.075592368,0.026094598,0.062350496,0.033525677,0.012824682,0.01178665,0.007051914,0.115667871,0.018255688,0.027579531,0.00851134
E06000007,2014,0.544448787,0.603491884,0.607907184,0.302975286,0.188919094,0.166609945,0.611520857,1.445792588,0.306787154,0.377347144,0.201475144,0.349739808,0.385504363,0.811369947,0.812150501,0.256148919,0.825638625,0.018451226,0.127693829,0.933810399,1.031985216,0.736869201,1.088134529,0.322386967,0.48087721,0.39422409,0.136344782,0.878702328,0.081231268,2.208479521,0.066375674,0.247550049,0.215595691,1.004108598,0.69061295,0.202987787,1.497356634,0.437921067,0.295145505,0.084029607,0.309309033,0.107295679,0.347807325,0.739980582,0.34781588,0.231488596,0.310305273,0.463232677,0.159220105,0.478105763,0.172877914,0.632329869,0.024669991,0.716838701,0.152206379,0.260581855,0.124372028,0.060647101,0.205502439,0.124234237,0.069489031,0.208578745,0.312324988,0.059828886,0.169884718,0.054546368,0.063623366,0.165673686,0.009937473,0.012797147,0.013872704,0.04790328,0.045586871,0.005800216,0.026994137,0.025003257,1.633981875,0.397874351,7.024680832,0.795507115,0.443569144,0.190614234,1.809765887,0.460156353,0.089598971,0.205474849,0.080491809,0.068464788,0.074099796,0.152819371,0.54195584,0.037377413,0.086643185,0.048037604,0.063374429,0.076279544,0.029967643,0.06745192,0.03741324,0.011446785,0.011627751,0.007802736,0.092949929,0.019069753,0.02988978,0.009018403
E06000008,2014,0.432469779,0.50318561,0.531877789,0.258336363,0.172662399,0.146419772,0.565474602,1.230191556,0.279749605,0.324089419,0.172809472,0.26473583,0.336090019,0.77342655,0.680010324,0.22401757,0.675334643,0.013761958,0.13275176,0.7992771,0.913407415,0.632209951,0.948816531,0.268217743,0.402455407,0.309224167,0.119226134,0.702379769,0.095796273,1.760312248,0.061735188,0.226043592,0.189222569,0.916127906,0.599351769,0.201135411,1.067475738,0.329255267,0.274947164,0.125889161,0.269604196,0.099416852,0.336871262,0.618276052,0.281878717,0.225486929,0.280806901,0.416093883,0.154076155,0.407528451,0.160330022,0.544450605,0.02848015,0.56849947,0.183587057,0.304986585,0.106651381,0.058368645,0.126849043,0.095051226,0.055217248,0.174032073,0.318774743,0.051291926,0.206376225,0.069330078,0.058518212,0.128251019,0.007088409,0.015568669,0.022805825,0.038578794,0.040977598,0.005113357,0.019597887,0.020717979,1.258890813,0.293122808,5.557684026,0.537274537,0.342655911,0.167092667,1.63875352,0.399636717,0.086292958,0.150851002,0.068229402,0.049782855,0.064602377,0.1108189,0.47925182,0.043803163,0.100573831,0.056069402,0.074097832,0.088734942,0.027321311,0.052657691,0.022931885,0.007624479,0.013605382,0.006431786,0.068153357,0.015758173,0.02409761,0.006284494
E06000009,2014,0.504040248,0.570341595,0.580074353,0.301489452,0.173548472,0.164857231,0.572286284,1.621509499,0.301216341,0.373223443,0.207470465,0.347748493,0.355170079,0.815066379,0.80896709,0.251463699,0.802141136,0.016106991,0.121176915,0.920050297,0.993631866,0.752182601,1.106926353,0.339370429,0.473321457,0.391170533,0.126454855,0.894240047,0.07149068,2.259587234,0.069434037,0.232268019,0.220345398,0.965176566,0.690091047,0.198149159,1.345242501,0.447608475,0.294174914,0.075846482,0.318382979,0.111321311,0.328723152,0.739338961,0.332193878,0.215570273,0.289264325,0.424262642,0.14892521,0.453457334,0.165655778,0.632494469,0.023766277,0.691929483,0.162816052,0.250373425,0.122862919,0.05527576,0.143250737,0.117525345,0.072714952,0.215264662,0.40133634,0.060669501,0.15380886,0.055700467,0.059750047,0.169442605,0.01026116,0.011369763,0.011555035,0.04675989,0.043213872,0.005173731,0.025145532,0.033506377,1.532428782,0.331791677,6.305664052,0.652571925,0.349553623,0.18340485,1.673262481,0.325831611,0.089854899,0.157967213,0.069711531,0.046664931,0.066003976,0.144601776,0.476367595,0.034884959,0.080631157,0.044728488,0.058575956,0.070446852,0.023825634,0.057722845,0.028587292,0.011510231,0.010918387,0.006512271,0.113152626,0.018014502,0.028208943,0.009938564
E06000010,2014,0.455043489,0.537881637,0.541948491,0.276944453,0.158498652,0.146411844,0.53313439,1.499903292,0.280433859,0.339239157,0.184559778,0.309961449,0.332745902,0.782186586,0.741922394,0.231006059,0.739663347,0.014957383,0.118440912,0.837300491,0.928104779,0.667889537,1.006515958,0.295456943,0.425956205,0.357837999,0.113021692,0.798003238,0.072809839,2.021531946,0.066928991,0.218579258,0.195286857,0.90769182,0.642840621,0.183564442,1.228275529,0.391435779,0.273320551,0.083652153,0.284504988,0.100313612,0.302264648,0.678950503,0.318750685,0.200206846,0.270158366,0.412730323,0.14023712,0.417235599,0.162764888,0.566970204,0.02349297,0.661413863,0.152688478,0.23553592,0.107983769,0.052409403,0.153324973,0.104582176,0.062841821,0.186753706,0.370974818,0.052488824,0.159413624,0.053451759,0.053511155,0.158761904,0.008767153,0.010966121,0.012021999,0.04102355,0.039474977,0.004678722,0.024922937,0.025516099,1.484607827,0.375074201,6.10469402,0.63946233,0.394213219,0.199334584,1.709233802,0.414295062,0.089837569,0.175157561,0.075930894,0.049501062,0.07218129,0.143105114,0.509351742,0.034213182,0.078654244,0.04274017,0.056542323,0.067249947,0.025655516,0.061390352,0.027524377,0.010911589,0.010821853,0.006862985,0.089096341,0.017984486,0.025013741,0.008334502
E06000011,2014,0.578537612,0.61946862,0.630000233,0.316194056,0.200504082,0.181713654,0.638808597,1.493572181,0.312466681,0.396615851,0.21911748,0.378963264,0.400003803,0.804647246,0.842113922,0.265439388,0.862506313,0.018822173,0.126387813,0.9748936,1.049168592,0.787906895,1.134663283,0.353099141,0.519510654,0.407242683,0.150603428,0.950628993,0.0811526,2.332779658,0.06465832,0.253625423,0.236298392,1.033212103,0.696177575,0.211082647,1.618406267,0.470441913,0.308861637,0.074333307,0.330156116,0.115131588,0.381269962,0.803905164,0.343924284,0.244117562,0.331276957,0.458119188,0.16651387,0.505443415,0.166697906,0.672288146,0.024544438,0.740080706,0.152237493,0.284546678,0.139686382,0.063725237,0.20159378,0.138862236,0.079766424,0.229599179,0.31364895,0.068044431,0.161193757,0.055912535,0.070183144,0.169253672,0.0112883,0.01382906,0.013014581,0.051378268,0.050717968,0.006750215,0.026933995,0.032748185,1.665920174,0.363966617,7.215559604,0.842391284,0.414345578,0.174060752,1.716964079,0.397071127,0.085895258,0.18183069,0.072364529,0.071683096,0.069074258,0.14800371,0.504656017,0.032628979,0.075661899,0.042288555,0.055892839,0.06746001,0.030126835,0.061342478,0.037596014,0.012485665,0.010082043,0.007452618,0.089527019,0.018586343,0.030611807,0.009294167
E06000012,2014,0.509583916,0.571757302,0.579213907,0.298669527,0.175238865,0.161137327,0.569815778,1.514296899,0.296225201,0.367415904,0.201731839,0.343207752,0.356554762,0.796089865,0.795289698,0.246963818,0.792335907,0.017329469,0.121529478,0.904013215,0.984075198,0.727538642,1.073835351,0.324953791,0.467960869,0.386106413,0.12787691,0.876263938,0.073550318,2.208000963,0.066872742,0.233667476,0.213916644,0.959632017,0.67652064,0.192173001,1.414603522,0.433031125,0.286628516,0.076951737,0.310993208,0.107028594,0.330607744,0.734461567,0.334052686,0.215783355,0.292925173,0.430594261,0.150420534,0.454707147,0.164706784,0.621428412,0.022926428,0.698356212,0.150115253,0.254421505,0.121383866,0.056023527,0.174625977,0.120426888,0.070418466,0.207579287,0.348397547,0.058981359,0.154399569,0.052050048,0.060358808,0.165002143,0.010187575,0.011505654,0.011417267,0.045805811,0.044360206,0.005491353,0.026190061,0.027156758,1.542769573,0.357351329,6.493766192,0.717945847,0.389374453,0.186641504,1.697186521,0.397142264,0.086741384,0.179210737,0.07365097,0.055877475,0.069538449,0.140740388,0.496238983,0.035435678,0.080826011,0.044737352,0.059134967,0.070924289,0.026486126,0.061969461,0.03117222,0.011811204,0.011125072,0.006915183,0.093991183,0.01802848,0.027296783,0.008241015
E06000013,2014,0.537263732,0.588500547,0.599400896,0.304142012,0.183929821,0.167930552,0.60146096,1.470396372,0.299591457,0.375164733,0.204934893,0.349646181,0.375490325,0.793523685,0.805260769,0.251233488,0.815883967,0.018158578,0.122818835,0.921108354,1.004853988,0.74052196,1.084345614,0.329125574,0.484564409,0.389939744,0.136991383,0.889354679,0.078713377,2.217693456,0.064835874,0.242849369,0.217350629,0.98923349,0.674188111,0.1995871,1.504521258,0.437780589,0.294275114,0.079087164,0.312000395,0.108187739,0.348058916,0.748247853,0.338325422,0.227927429,0.309587669,0.444209586,0.157810001,0.472854,0.166676208,0.631967014,0.023969994,0.722141426,0.152329317,0.264451938,0.128084102,0.059323661,0.196036917,0.126675359,0.0721742,0.212557072,0.319863804,0.061525853,0.15948893,0.05356981,0.064448024,0.165417252,0.010233419,0.012759256,0.012742719,0.047283682,0.046777393,0.005862127,0.026796189,0.02882356,1.610172968,0.374324748,6.859335143,0.782901598,0.41350822,0.180736674,1.719073075,0.422980037,0.086626891,0.185004304,0.074081151,0.065132807,0.070709293,0.144600662,0.504678103,0.034972988,0.080446853,0.044822482,0.058889948,0.070861178,0.02860538,0.064142997,0.034433273,0.012521456,0.01089575,0.007246912,0.086214565,0.018278584,0.028682466,0.00821315
E06000014,2014,0.516036663,0.57848167,0.585182411,0.294964537,0.181629857,0.160772083,0.591994341,1.443596734,0.292622867,0.363572783,0.197208138,0.337965539,0.369257073,0.793256704,0.789748769,0.244666223,0.794801071,0.01712881,0.122790845,0.899454356,0.984372095,0.715092641,1.065578834,0.315316005,0.464181768,0.375433831,0.128949869,0.85169744,0.076884667,2.132811657,0.064152235,0.235611399,0.211644458,0.962382463,0.661024793,0.198400606,1.404522545,0.42210449,0.28905602,0.079378998,0.300737652,0.10574827,0.338009196,0.737864441,0.332742584,0.222451114,0.299837566,0.441784176,0.152290725,0.457561703,0.166094061,0.615214907,0.023747175,0.681770764,0.149642181,0.253235049,0.122288744,0.057522931,0.182194458,0.120433401,0.07009286,0.203970443,0.33132375,0.059627556,0.16313676,0.055088358,0.061463606,0.1635338,0.009569645,0.012400553,0.013184396,0.046181233,0.043982664,0.005483859,0.025920442,0.025968986,1.654335012,0.44736789,6.938934791,0.758057453,0.44380236,0.204360684,1.775771493,0.467759692,0.091236182,0.203853144,0.082633526,0.064426262,0.075869515,0.166067479,0.545103712,0.030412394,0.069815667,0.038464099,0.050876446,0.060901571,0.031363808,0.067151122,0.035940437,0.014155829,0.009523582,0.00751701,0.101388607,0.018626087,0.027242068,0.008872396
E06000015,2014,0.479286221,0.545508439,0.566830043,0.278581788,0.180612541,0.152662551,0.588645903,1.309198134,0.285605653,0.342252766,0.181432287,0.294612134,0.362454864,0.77590462,0.729382156,0.233395818,0.733068929,0.016013619,0.128349827,0.845854231,0.957948126,0.667813292,0.990646222,0.284461477,0.435322166,0.334628887,0.125037921,0.764960922,0.089103573,1.917116243,0.061065853,0.233577868,0.196194236,0.942258954,0.621876378,0.200640049,1.245963594,0.367773077,0.282897217,0.103398509,0.276505885,0.100899296,0.340598069,0.674847393,0.307090004,0.228488478,0.297906098,0.435726938,0.156635042,0.434234683,0.164188756,0.581522997,0.027217428,0.616203191,0.165076957,0.286986866,0.114956669,0.058619219,0.166518118,0.111387887,0.06293488,0.18649712,0.306206663,0.055599553,0.186886549,0.064545246,0.061987881,0.14098274,0.008531799,0.012891763,0.019901946,0.042068651,0.044775944,0.005231461,0.022929939,0.022701449,1.464112702,0.376574865,6.403918541,0.681674831,0.413311869,0.187936576,1.726197693,0.468133355,0.087045745,0.18855194,0.077262718,0.061349573,0.072932843,0.13536326,0.527989812,0.038513072,0.088426471,0.048652124,0.064126702,0.076850493,0.027851901,0.063560203,0.029782028,0.009649944,0.012093261,0.007249658,0.072220833,0.01770938,0.026127568,0.007139953
E06000016,2014,0.390472998,0.47212101,0.523631022,0.223234977,0.175692991,0.138628201,0.578673059,1.039476865,0.267129679,0.285228411,0.150920064,0.21944432,0.336151657,0.739571631,0.61828871,0.207603156,0.601783517,0.011803756,0.144559251,0.733932403,0.859072395,0.573165636,0.873517112,0.231900594,0.364070405,0.251649488,0.115364028,0.600436199,0.114111095,1.454305976,0.055414854,0.221125306,0.174220049,0.919539871,0.527854951,0.20754776,0.871009534,0.258615473,0.279659788,0.138138366,0.248291951,0.091907903,0.353183199,0.584007137,0.24131222,0.241092029,0.290193338,0.417201631,0.160829162,0.37735616,0.151105683,0.51109056,0.034025173,0.480134293,0.194127174,0.360345507,0.101366476,0.063663268,0.112288497,0.084176967,0.048245357,0.153404849,0.282477544,0.048886536,0.24736314,0.082569254,0.056342443,0.103646934,0.005694053,0.01559448,0.033624699,0.033347719,0.040921488,0.005385902,0.01552619,0.014842909,1.080763744,0.297295374,5.344349778,0.471249747,0.34610511,0.16214119,1.606705933,0.460817825,0.086039609,0.147142933,0.069729364,0.04344447,0.064950093,0.099507715,0.491468032,0.039268039,0.090185869,0.049616715,0.065441857,0.078082565,0.028850526,0.053053866,0.018704252,0.005929699,0.012347102,0.006673832,0.049984904,0.015349556,0.020868689,0.004698737
E06000017,2014,0.599967947,0.640037791,0.643863904,0.330682818,0.207305991,0.188118421,0.657149222,1.557830859,0.323740153,0.411423966,0.228285593,0.393674818,0.410624948,0.810996258,0.867300629,0.277323324,0.90132185,0.018913677,0.125911426,1.006292273,1.079265583,0.81844704,1.169776298,0.365247167,0.537947229,0.421197162,0.153884057,0.97354429,0.080319647,2.404507202,0.063701562,0.261007519,0.240678174,1.053012253,0.7154689,0.218827007,1.687165719,0.493293819,0.315876669,0.072054059,0.338857672,0.117254858,0.386123422,0.839154361,0.351577075,0.25104341,0.340604813,0.464857711,0.167473322,0.521728139,0.172045848,0.697491648,0.024503232,0.76639833,0.157033223,0.285373162,0.146598721,0.065165624,0.204297186,0.139880782,0.083549637,0.239214403,0.312631305,0.070533702,0.15416943,0.05581915,0.07241125,0.17563244,0.012233683,0.011777123,0.012381835,0.054568937,0.051440891,0.006603402,0.027084116,0.035249801,1.718450005,0.368328168,7.523620688,0.853184451,0.419724773,0.171875057,1.762411382,0.37756376,0.088480309,0.189335247,0.072767474,0.073323063,0.068318486,0.155000185,0.520160039,0.035769216,0.082528607,0.047196053,0.062168007,0.075143423,0.029679181,0.060665418,0.03761763,0.011398047,0.010843974,0.00799306,0.091664725,0.019825161,0.033244105,0.010972824
E06000018,2014,0.411832642,0.494586847,0.5100193,0.259417779,0.157714193,0.133688079,0.523106802,1.270721725,0.267970324,0.308987151,0.166933921,0.261350234,0.319524567,0.767740602,0.655909636,0.215234113,0.65814206,0.013160937,0.132941126,0.770552126,0.883651235,0.596721409,0.924185214,0.257136479,0.389564611,0.308353189,0.105397881,0.721054354,0.080629076,1.735598537,0.061349249,0.212175205,0.178828539,0.867183676,0.582397389,0.187254706,1.036222393,0.330591561,0.270074216,0.097403684,0.258970708,0.09614473,0.312802662,0.630405056,0.280615938,0.207703139,0.267781399,0.421623594,0.136240766,0.389010213,0.16229327,0.521614423,0.027846358,0.56409388,0.160791753,0.27513387,0.103789805,0.050461425,0.127609638,0.093201288,0.05653947,0.163251997,0.349957513,0.048670297,0.188641633,0.066274945,0.05190772,0.136668691,0.006815119,0.011106305,0.016633674,0.035679127,0.042857799,0.004411608,0.020691052,0.019594436,1.43474702,0.393224629,5.856097216,0.583302988,0.41029258,0.209610414,1.724391469,0.467195031,0.089602536,0.178564077,0.080274722,0.054940124,0.074797704,0.145526958,0.538356896,0.034846035,0.08024307,0.043768572,0.057869862,0.068913205,0.028646421,0.061097107,0.025998987,0.008987893,0.01099088,0.006748531,0.072903601,0.017330033,0.022275816,0.007516298
E06000019,2014,0.554922081,0.60506158,0.610432517,0.313584607,0.191929215,0.178570679,0.615660279,1.554216696,0.309467748,0.390972433,0.216482591,0.371944027,0.384584437,0.795884507,0.833587801,0.261993554,0.849829483,0.016792085,0.123184948,0.962370606,1.026986818,0.78268856,1.127764394,0.35194417,0.508040157,0.404168439,0.143023125,0.933994533,0.075494096,2.312165132,0.064208178,0.246255973,0.231757893,1.00492909,0.692088652,0.2098429,1.53485906,0.466957179,0.302235588,0.072887663,0.326955767,0.114074448,0.36254551,0.796738524,0.335059726,0.236561345,0.317390448,0.440339753,0.159361714,0.490737729,0.163725005,0.658078567,0.02330194,0.728169671,0.153411245,0.267228345,0.135843882,0.060365366,0.173789904,0.131908002,0.080406132,0.22803995,0.334244368,0.066138765,0.152196156,0.055299699,0.067446115,0.171553059,0.011332339,0.01139799,0.012172059,0.050439558,0.047639633,0.00619715,0.026669319,0.034831235,1.645253849,0.361419486,7.005683336,0.772759976,0.395698206,0.17718,1.719164355,0.354787945,0.089349034,0.173980512,0.073148967,0.059470232,0.068475748,0.155350569,0.499837922,0.033215966,0.076984545,0.042871067,0.056775023,0.06817392,0.027177091,0.058278259,0.034720522,0.012455959,0.010297978,0.007617618,0.103632423,0.018629067,0.032106647,0.011186001
E06000020,2014,0.498629622,0.568703438,0.572720379,0.294246081,0.172083754,0.158611265,0.573348615,1.498097242,0.296229078,0.361194601,0.194448008,0.326624054,0.356861427,0.809697609,0.783481071,0.245041338,0.78403047,0.016265377,0.122564892,0.893210103,0.984264211,0.708616697,1.054987677,0.314276529,0.455287658,0.379701382,0.127506,0.843150139,0.078243888,2.121603201,0.066283354,0.234645202,0.204788194,0.959693454,0.673119197,0.194977687,1.35773196,0.412663599,0.283444683,0.092548804,0.301833334,0.104929913,0.325313772,0.71202439,0.335036508,0.216257532,0.291494383,0.43628978,0.150650196,0.448778692,0.168056666,0.602037294,0.02428653,0.695592264,0.157755271,0.25644252,0.117910781,0.05673416,0.172941716,0.112729402,0.066434775,0.198884018,0.341512694,0.055619924,0.163834216,0.055351185,0.0590506,0.166053892,0.009513109,0.011652523,0.013694944,0.044443861,0.042058917,0.005314846,0.025633779,0.026954204,1.53707134,0.362893609,6.40795553,0.690499082,0.404508383,0.191614288,1.758554242,0.416792575,0.089979205,0.179396481,0.075788597,0.055569358,0.071437971,0.144967681,0.510472576,0.038109157,0.087916995,0.048654425,0.064116722,0.076894116,0.026515609,0.062388218,0.03097997,0.012119704,0.011963379,0.007176835,0.094194829,0.018681421,0.027934811,0.008495868
E06000021,2014,0.468518826,0.538324573,0.556289696,0.278159757,0.171572277,0.153188337,0.562253891,1.399503147,0.285117128,0.340843019,0.18504622,0.30819956,0.346083815,0.77870641,0.73523932,0.234136434,0.735473632,0.014988315,0.125640296,0.850851372,0.93804837,0.676992467,1.009711194,0.296084914,0.435085859,0.347951113,0.121253096,0.791515087,0.081564313,1.984408675,0.063705188,0.227311213,0.20091946,0.930458863,0.63150733,0.195447453,1.236638041,0.382932288,0.280866217,0.09396601,0.288780865,0.101929584,0.330967493,0.697688506,0.307799254,0.21839518,0.286619686,0.420718464,0.149329312,0.42779685,0.160935947,0.58132644,0.025343268,0.632791086,0.160415634,0.280395264,0.113590799,0.056601735,0.150070929,0.108871176,0.065161603,0.190616598,0.340295378,0.054636801,0.175422713,0.060839382,0.05879431,0.151256285,0.008851709,0.011346304,0.016399497,0.042215538,0.042993321,0.005314345,0.022652241,0.026489461,1.468181055,0.352194049,6.151572133,0.639520479,0.381889893,0.185300618,1.692954365,0.419783599,0.085732279,0.170462375,0.073174034,0.050133693,0.069400489,0.137536097,0.498900615,0.035838615,0.082446633,0.044944492,0.059411059,0.070803179,0.02603739,0.059787244,0.029816232,0.01040493,0.011305803,0.00668193,0.102205898,0.017649751,0.025965692,0.007982463
E06000022,2014,0.553682842,0.610506255,0.615006577,0.307613031,0.198551392,0.174372848,0.631721838,1.507565423,0.308591868,0.387084588,0.209402797,0.364179394,0.395550224,0.808354361,0.824672892,0.261102909,0.844599939,0.018249618,0.127869588,0.948590012,1.036954793,0.758224096,1.109621079,0.33462621,0.495958738,0.397252768,0.142778264,0.907637644,0.080856963,2.246563297,0.065525119,0.249815126,0.225331988,1.011367643,0.684840932,0.211784414,1.512078953,0.449609087,0.302263147,0.075189868,0.315289167,0.111466365,0.363188302,0.773567809,0.341324311,0.240271609,0.322083128,0.464143126,0.161102068,0.489750377,0.169820831,0.647558264,0.025486016,0.717796882,0.155165842,0.26293209,0.132377449,0.061635177,0.191480725,0.129041853,0.076827318,0.21784179,0.322422272,0.064925131,0.167270578,0.057726604,0.067090668,0.169821213,0.010049322,0.013401348,0.013714361,0.049698538,0.046614862,0.005854887,0.026309407,0.031225445,1.726845442,0.434489558,7.402377866,0.813497983,0.467880751,0.209554437,1.83579527,0.44660835,0.095218076,0.214809626,0.085192937,0.074641753,0.077988549,0.171320573,0.578324228,0.034556008,0.079730174,0.044460393,0.058729561,0.070633221,0.032051313,0.067817644,0.037296428,0.01256513,0.010786347,0.008540701,0.083798948,0.019916743,0.031862704,0.010573256
E06000023,2014,0.474874604,0.558676953,0.563714636,0.284130463,0.177104799,0.146968845,0.578186919,1.357064683,0.282918918,0.33967042,0.178980537,0.298145574,0.364438394,0.781139075,0.724053121,0.233147257,0.739088569,0.016015148,0.13395503,0.834755661,0.961354466,0.649321735,0.990042276,0.280088169,0.429978156,0.339632982,0.120987133,0.806882692,0.082352542,1.912469272,0.06178977,0.229010949,0.192343978,0.938904015,0.618452939,0.200000774,1.253498365,0.376424605,0.283435432,0.091529835,0.27067537,0.100849449,0.332131972,0.691962472,0.309765334,0.223970239,0.296906828,0.45929211,0.145764898,0.432179208,0.17410964,0.56275878,0.026277021,0.639846303,0.15202185,0.272132556,0.114265627,0.055395711,0.174452979,0.113317546,0.06553119,0.181113977,0.32242873,0.053742826,0.188540438,0.067146442,0.058939292,0.153116644,0.007918918,0.010604718,0.015822048,0.040242484,0.047415917,0.004644005,0.024010963,0.022210372,1.632152468,0.480083332,6.8513598,0.753895099,0.489532216,0.222200532,1.878829516,0.542248898,0.092627189,0.226739796,0.089728809,0.072722027,0.08253563,0.168867469,0.602385702,0.034463745,0.079200063,0.042997203,0.056768092,0.06753794,0.029711609,0.069231303,0.030422009,0.013429069,0.010935341,0.008269507,0.081774838,0.017994471,0.02734941,0.010250898
E06000024,2014,0.592142488,0.635812815,0.644723481,0.324706911,0.205871698,0.182190809,0.65384993,1.479930972,0.320355661,0.406083732,0.222000191,0.381724307,0.407067042,0.822040241,0.864257217,0.268572284,0.879250104,0.020264774,0.130388256,0.989919875,1.078213284,0.802140248,1.157073364,0.354234648,0.528509697,0.417295014,0.150161526,0.957358632,0.083893529,2.376667741,0.066744713,0.259685598,0.238294275,1.050636926,0.712730788,0.215987341,1.644483952,0.473178092,0.316356585,0.076635592,0.336325181,0.117135829,0.383366711,0.803125697,0.354458489,0.248978864,0.340156368,0.476057144,0.168748801,0.513482932,0.175170879,0.686774327,0.024895918,0.749072009,0.160561088,0.288423668,0.142553031,0.06299677,0.207040371,0.141020046,0.080132489,0.231179243,0.315708104,0.068824104,0.167893717,0.05663532,0.071619032,0.169777818,0.011383327,0.013728513,0.013769224,0.051771468,0.051650315,0.006656688,0.027007337,0.030547109,1.692147184,0.401851182,7.428230682,0.858169841,0.434215784,0.180073469,1.740446665,0.447507549,0.088028583,0.198375751,0.076528552,0.071787338,0.07175574,0.148187724,0.5210086,0.036557632,0.084709018,0.046806304,0.061856026,0.074316382,0.030600234,0.06419029,0.038352054,0.013732098,0.011301695,0.007331139,0.092160091,0.019405009,0.03160442,0.00844779
E06000025,2014,0.570965114,0.627798778,0.63309843,0.313981536,0.198185396,0.17265099,0.6397972,1.466042827,0.318806622,0.390830633,0.209717854,0.360757246,0.403195326,0.837326549,0.840670477,0.264878102,0.855899554,0.019047064,0.132091789,0.97048962,1.071262346,0.760987044,1.120351195,0.331017934,0.504441858,0.407211823,0.144509033,0.90986294,0.085704811,2.268810752,0.066712165,0.257376219,0.222053702,1.038594382,0.710998825,0.211394894,1.590121332,0.44995132,0.306029571,0.090507228,0.318281986,0.111355267,0.365589595,0.791981478,0.356886111,0.243481774,0.329350741,0.481313156,0.166362159,0.50002647,0.176358002,0.659887191,0.025930554,0.748146076,0.156597102,0.277132175,0.130816372,0.064157811,0.221153436,0.132421595,0.073861701,0.215641515,0.309170603,0.064018216,0.177351718,0.056154292,0.067747798,0.172742539,0.010783983,0.013509374,0.014911443,0.04949379,0.048874764,0.006122413,0.028129959,0.028544754,1.722350524,0.421177899,7.469605019,0.854810267,0.476779796,0.201742759,1.877163611,0.501773276,0.091321948,0.217897147,0.084882175,0.076492973,0.078466602,0.158910908,0.571238567,0.03677683,0.085044043,0.047019917,0.061975796,0.074367156,0.032277162,0.071297612,0.039290415,0.013164791,0.011495609,0.008171277,0.083184994,0.019947307,0.031370607,0.009334282
E06000026,2014,0.523940145,0.590910714,0.595424803,0.304749275,0.180771089,0.163497734,0.593543102,1.546913631,0.302379697,0.37191819,0.201761269,0.347192284,0.371029627,0.823628862,0.807767646,0.251000073,0.812775101,0.017171562,0.125700873,0.919570511,1.007225687,0.728476405,1.090680186,0.324173967,0.473457027,0.391613563,0.131301278,0.877518308,0.078277826,2.204486216,0.067658418,0.239702652,0.21701938,0.984423863,0.683817331,0.200412443,1.428762539,0.433973206,0.295199584,0.084822742,0.309487314,0.108736517,0.340946704,0.756475682,0.342515008,0.224075369,0.301803839,0.44962316,0.155269245,0.467107812,0.170783903,0.627696967,0.024796528,0.711116963,0.154801108,0.25314125,0.123733846,0.059106353,0.183162929,0.120856231,0.072441716,0.207710783,0.352182966,0.059559376,0.166270898,0.055661599,0.061801008,0.171113319,0.010009344,0.012455825,0.01235909,0.046949513,0.044603972,0.005502508,0.026427907,0.028002806,1.686644113,0.437056757,6.998820976,0.75697972,0.454441381,0.214443144,1.833874453,0.463310561,0.093733091,0.20497034,0.084310456,0.065583345,0.07824827,0.167116579,0.559569367,0.03420645,0.078938921,0.043251695,0.057128734,0.068176188,0.030656045,0.068226769,0.034764824,0.014334211,0.010744297,0.007852934,0.103002901,0.019819801,0.028714157,0.009524356
E06000027,2014,0.573800566,0.616888056,0.632038474,0.324078756,0.198387301,0.184772654,0.635285077,1.625768451,0.320966844,0.404412943,0.226528215,0.385969805,0.393866979,0.824211115,0.86543395,0.268893649,0.870049071,0.017588969,0.127928957,0.996758451,1.058245813,0.813607739,1.170698225,0.369121211,0.52635592,0.415371209,0.148516083,0.972931369,0.079674403,2.407898057,0.067578724,0.252512222,0.248750468,1.039016089,0.711891569,0.217839879,1.557452469,0.487288647,0.318030211,0.07378432,0.341256994,0.121824985,0.387695807,0.822789672,0.339115705,0.245558741,0.329974312,0.451738984,0.166705465,0.507674843,0.16659837,0.690217096,0.025015923,0.735048447,0.163755247,0.289420834,0.142297502,0.062712751,0.168616429,0.139727117,0.085410251,0.239967558,0.356106228,0.071207626,0.163724463,0.059635856,0.071026371,0.170882095,0.01198382,0.012560355,0.013101165,0.052903539,0.05090988,0.006801174,0.027300038,0.034221035,1.618906001,0.350085913,7.022064231,0.760777896,0.381900092,0.17277744,1.706295802,0.34566815,0.089183999,0.16552564,0.069982703,0.056197864,0.067924634,0.150839941,0.487648282,0.033718103,0.077668042,0.043136234,0.056431937,0.06845584,0.026978504,0.056961778,0.033104643,0.014368282,0.010496364,0.007043471,0.104675812,0.018166556,0.031735052,0.010521074
E06000028,2014,0.511951394,0.585799884,0.595057526,0.296706328,0.187890063,0.162801082,0.60701597,1.438289158,0.293729748,0.365705454,0.19553093,0.336227781,0.37801251,0.792775759,0.789279009,0.24552346,0.797983746,0.017223718,0.129033481,0.894865468,0.98925222,0.714715967,1.066667181,0.308897362,0.464941965,0.369790913,0.130263446,0.838803588,0.082169825,2.117946393,0.064675644,0.23943355,0.209344187,0.982381146,0.652527314,0.205553067,1.386991467,0.413490868,0.29687665,0.080577304,0.297499883,0.105912599,0.346337456,0.74589807,0.329055282,0.230089536,0.307658591,0.454184164,0.155622484,0.457897194,0.171279649,0.614543081,0.024821438,0.695618693,0.154583266,0.255415496,0.122271569,0.05845754,0.180375582,0.124565546,0.072101613,0.203134767,0.33966771,0.061711019,0.177450649,0.057910288,0.063102953,0.161861342,0.009269908,0.012551091,0.014781697,0.045623693,0.045391775,0.005217712,0.025357999,0.029260297,1.698683526,0.487335487,7.218795301,0.775599797,0.463286915,0.208835179,1.831932855,0.498146689,0.097090865,0.217286141,0.08617142,0.062365146,0.07846165,0.168960309,0.576439467,0.030347715,0.069217268,0.037790796,0.049841048,0.059506693,0.032164769,0.069146436,0.032241057,0.012762381,0.009568555,0.00844015,0.085372613,0.018434662,0.028755206,0.010201546
E06000029,2014,0.571021465,0.625306081,0.631002132,0.322549745,0.199403315,0.179139156,0.635266012,1.548466532,0.318541408,0.401379053,0.218763737,0.372031444,0.397463561,0.824999652,0.856926701,0.265320105,0.86279916,0.018534621,0.128786675,0.984128957,1.06353439,0.792102048,1.151722299,0.350271068,0.516895617,0.412427042,0.142335963,0.939016558,0.080151901,2.359826979,0.067885573,0.254921496,0.232773011,1.028727953,0.710694191,0.21507525,1.586712033,0.467015165,0.310061884,0.08047236,0.328393588,0.116494576,0.368322001,0.79993914,0.350545495,0.242689497,0.326701819,0.465604512,0.164609832,0.503515442,0.173500381,0.677570819,0.024420486,0.748188878,0.158842122,0.274086971,0.136783939,0.061920459,0.197819018,0.136147342,0.080337339,0.227705451,0.33461731,0.067484543,0.16510113,0.056064196,0.069382744,0.172923721,0.01135382,0.012789323,0.01328342,0.050760068,0.049748216,0.006226209,0.028071764,0.03263717,1.692869524,0.399628735,7.320788664,0.814517188,0.432107941,0.189937078,1.803204747,0.432621549,0.091470958,0.197222593,0.079478138,0.065483794,0.073892725,0.160384303,0.538230792,0.034688073,0.080593103,0.044395699,0.059090372,0.070521086,0.029639385,0.065019823,0.035187119,0.014153167,0.010912073,0.007906719,0.097621124,0.018884007,0.031210113,0.009857651
E06000030,2014,0.519927633,0.597684623,0.604446246,0.297174643,0.186184914,0.162398706,0.613430219,1.437993157,0.305584663,0.368712693,0.194016163,0.329037674,0.384053058,0.824897323,0.792651431,0.250501794,0.802352555,0.01755237,0.13304543,0.914372945,1.024638486,0.714321252,1.071560931,0.308001281,0.468658622,0.376958849,0.133674534,0.841560331,0.088772748,2.114849994,0.066104797,0.245714645,0.207580964,1.010154358,0.679938919,0.206260835,1.421677133,0.408669999,0.2960297,0.102760765,0.298775513,0.10671366,0.348418529,0.733627497,0.340568855,0.233541794,0.311906485,0.466756366,0.16194789,0.466340321,0.174907323,0.617423272,0.026488651,0.711965323,0.163411078,0.275467998,0.11895872,0.062603423,0.20119957,0.118332807,0.066644247,0.19953901,0.322047587,0.057845029,0.191510909,0.060269859,0.063163679,0.163585971,0.009292885,0.013228661,0.017381065,0.045473668,0.045185659,0.005397493,0.026264629,0.02609834,1.61058913,0.407930902,6.957781292,0.762392863,0.452842211,0.198879206,1.870236204,0.501417742,0.092905284,0.20900896,0.083306609,0.067105412,0.076903775,0.151211865,0.56928618,0.038306807,0.088474497,0.048224434,0.06379444,0.076448467,0.030644244,0.069535162,0.033018121,0.011829148,0.01200705,0.008046752,0.082915265,0.018933118,0.029033251,0.009176291
E06000031,2014,0.472950271,0.545192309,0.557868854,0.27734612,0.174436689,0.150081969,0.577383653,1.310631688,0.286064068,0.343204513,0.181186111,0.294858117,0.354923058,0.784396181,0.732234102,0.232645719,0.736685886,0.015355361,0.126350034,0.844280561,0.955750478,0.661814788,0.98929843,0.28347096,0.432873825,0.342005019,0.121493937,0.765217435,0.087237466,1.918472914,0.063405666,0.230799056,0.191699756,0.940791558,0.629674577,0.196864587,1.236856308,0.365558227,0.279343872,0.112955953,0.278373941,0.100478259,0.331775049,0.678139109,0.311549255,0.221887415,0.291396193,0.435985837,0.152996737,0.432903556,0.164573058,0.574936399,0.026052556,0.632021825,0.165910648,0.278853649,0.110892745,0.057984768,0.16463392,0.107972982,0.059774966,0.183333583,0.308036378,0.054064837,0.190333086,0.061515951,0.059836601,0.147951721,0.008315945,0.0130469,0.018846171,0.04106975,0.04330172,0.004908146,0.023275105,0.024006107,1.426626116,0.367379621,6.265294032,0.663373659,0.407288018,0.187825231,1.737705335,0.471157403,0.088528641,0.18421271,0.077297488,0.058129341,0.072983341,0.131185911,0.520302377,0.039457011,0.091095319,0.049423243,0.065149693,0.077671511,0.027774554,0.062138102,0.028190425,0.009896553,0.012529169,0.007339072,0.075674985,0.017578924,0.026520961,0.00775146
E06000032,2014,0.402357372,0.484594356,0.517690669,0.2471058,0.168354955,0.135114048,0.565498986,1.0286767,0.266159332,0.300457573,0.155840616,0.226944112,0.332226528,0.743875702,0.621088316,0.207109688,0.621968411,0.012651016,0.138317474,0.748883974,0.877192244,0.57643984,0.880323237,0.237427101,0.378958617,0.270479399,0.112359209,0.652069731,0.103856364,1.526773492,0.055710172,0.218691691,0.170634428,0.90543381,0.547901173,0.199729293,0.953595978,0.277717791,0.271988333,0.145652736,0.249218116,0.094892404,0.341362596,0.616097429,0.257078958,0.227942841,0.289481022,0.427718587,0.151992977,0.384686281,0.159634382,0.514119186,0.031046066,0.501112379,0.184504994,0.34984581,0.102386042,0.059145367,0.123101081,0.092232336,0.051821099,0.155201762,0.275969623,0.048936837,0.236551879,0.079369128,0.057374822,0.114028685,0.006104119,0.012400216,0.028660688,0.033826272,0.045550986,0.004976467,0.016841513,0.015976294,1.139605764,0.32139421,5.440687493,0.507166808,0.361564188,0.169255417,1.634561202,0.505645125,0.08271952,0.155342738,0.070631373,0.046919561,0.067852419,0.106246796,0.500168915,0.042106669,0.09709653,0.052804745,0.069798213,0.083175521,0.02720688,0.053545903,0.020758885,0.006231518,0.013312705,0.006381599,0.059064343,0.015116895,0.023111345,0.005245556
E06000033,2014,0.525337718,0.585503158,0.593084003,0.304520198,0.190370071,0.163431921,0.605873763,1.415468352,0.298252989,0.373881298,0.199729857,0.333536944,0.377997304,0.79234297,0.781317937,0.24927415,0.796961019,0.018059459,0.129013952,0.906892433,1.013025804,0.723849712,1.06126855,0.315746979,0.476053233,0.37630245,0.132733318,0.869920445,0.081881145,2.143692765,0.064961981,0.243280316,0.213649352,0.978218038,0.664221749,0.205707117,1.418113772,0.42316283,0.295156597,0.087045168,0.301609275,0.109833272,0.355312589,0.713739263,0.327824714,0.23263889,0.312864858,0.459275819,0.15475569,0.467952192,0.174147409,0.617959032,0.025312754,0.676680856,0.160054884,0.276611585,0.127139349,0.057912463,0.181552051,0.123088204,0.071590419,0.20466321,0.319637912,0.060381864,0.177990216,0.061069787,0.065555013,0.15659443,0.009495448,0.013280027,0.014771107,0.045819544,0.048502042,0.005370761,0.024622889,0.026550469,1.587184978,0.39604399,6.838776704,0.756917749,0.427321876,0.186501937,1.772161126,0.451271412,0.087259622,0.198439435,0.078135865,0.068420965,0.072842712,0.145149836,0.529450238,0.035980345,0.082777321,0.045648144,0.060107813,0.072189517,0.027863414,0.063411114,0.032464568,0.012262956,0.011273419,0.007410789,0.088432243,0.017955718,0.029757582,0.009288137
E06000034,2014,0.494955432,0.562684842,0.563823199,0.300727333,0.176030667,0.15117444,0.581114435,1.311467231,0.289958897,0.358458728,0.187433915,0.301666012,0.361627096,0.792909022,0.737238564,0.236010448,0.755582294,0.016564909,0.130561278,0.860996073,0.986521399,0.668039136,1.007656464,0.290454012,0.447367725,0.357774846,0.125401634,0.835118772,0.082960014,1.989250669,0.064700358,0.235352158,0.193233563,0.957342085,0.645034308,0.196027902,1.311023736,0.385585504,0.28036242,0.108787517,0.284026943,0.105101277,0.339316556,0.674634614,0.320956183,0.222221578,0.300464503,0.463332988,0.149460548,0.444197032,0.179020594,0.574732728,0.025907961,0.652988606,0.157180102,0.280300389,0.116051092,0.05551161,0.178300203,0.112902918,0.061581001,0.184777821,0.301277165,0.054093152,0.187366857,0.063019583,0.060637686,0.153354422,0.008197348,0.01187158,0.014609716,0.041613363,0.047703194,0.004765647,0.023641312,0.022110776,1.508163367,0.400528915,6.430767148,0.715294003,0.438915694,0.196329964,1.808544177,0.499526815,0.087214476,0.196528402,0.079906474,0.070667571,0.077338507,0.141866469,0.541958271,0.04020642,0.092445834,0.050722092,0.067083613,0.079916294,0.028454052,0.062662745,0.029980515,0.010778985,0.012673377,0.007569127,0.073307801,0.017231188,0.028207085,0.007895203
E06000035,2014,0.520161284,0.584570387,0.594058148,0.301430318,0.183083745,0.161393871,0.601278786,1.417466125,0.30010872,0.367963805,0.195473216,0.330791918,0.375961547,0.809318661,0.782426475,0.247914643,0.795350473,0.017651107,0.129216646,0.899935145,1.011157812,0.708979609,1.054328513,0.309351204,0.464021769,0.376415726,0.131829822,0.85004037,0.084050383,2.117627237,0.066925927,0.244490227,0.208565139,0.987424395,0.670489632,0.200984269,1.40409522,0.414137325,0.292416318,0.094526706,0.296453127,0.106212822,0.346429804,0.712243731,0.338405461,0.229350009,0.304750935,0.461973937,0.158033605,0.462078109,0.175041773,0.607119697,0.026138101,0.68606646,0.157652163,0.26746573,0.120568467,0.059506354,0.189412875,0.118566606,0.066632245,0.200307442,0.321351672,0.057575935,0.178248634,0.058881836,0.062454012,0.159908416,0.008999894,0.013113207,0.014749168,0.04563796,0.04547493,0.005448444,0.025309375,0.023836884,1.599851479,0.40449728,6.818439323,0.767220523,0.448192894,0.198961143,1.827711142,0.467913865,0.090624719,0.201471851,0.081787896,0.070472643,0.076245106,0.150541287,0.547714544,0.039847071,0.09212728,0.050872215,0.067344088,0.080770734,0.030694321,0.066610989,0.034071051,0.011097431,0.012346051,0.007803884,0.08424423,0.018586535,0.02932284,0.008266114
E06000036,2014,0.553768433,0.619560198,0.620124154,0.302799125,0.194853362,0.164049234,0.63540489,1.389893736,0.30760723,0.379080947,0.195011041,0.339526131,0.400505998,0.821544757,0.809178696,0.253716379,0.828067973,0.019931922,0.135447008,0.928603242,1.054835493,0.718904537,1.074923777,0.306823393,0.478790887,0.390510065,0.140021132,0.851725077,0.090143147,2.149790793,0.066847543,0.252449574,0.207317818,1.025049288,0.686161928,0.206023977,1.526950549,0.416259216,0.296358269,0.102466649,0.297145514,0.107090592,0.354823159,0.728851333,0.352836113,0.236368553,0.319909086,0.488704472,0.165554965,0.485202727,0.179807623,0.625173491,0.025576337,0.727511106,0.159106256,0.261533662,0.121278715,0.063436862,0.231014825,0.123237548,0.066207281,0.200262474,0.290093129,0.058978917,0.192045974,0.055898165,0.0652162,0.163992407,0.009239523,0.015057297,0.016620588,0.046541927,0.046067809,0.005435623,0.027234017,0.023732861,1.663001196,0.44542459,7.373335628,0.849899627,0.492209957,0.19901361,1.887279124,0.556965419,0.092260242,0.234577069,0.087761963,0.085835125,0.078302123,0.155447816,0.586416567,0.039124816,0.089183515,0.049557073,0.065693408,0.078199614,0.033147054,0.072948183,0.036359708,0.012656244,0.012251492,0.008293049,0.077192327,0.019659078,0.030235838,0.008684151
E06000037,2014,0.580873413,0.636213048,0.633277884,0.307673742,0.205914199,0.17505168,0.656875705,1.438398467,0.314577097,0.393988617,0.208212365,0.362402375,0.415201728,0.823033176,0.836246301,0.26446992,0.862632773,0.020867628,0.134454464,0.961089287,1.074356898,0.754669608,1.108118853,0.327119125,0.505301953,0.408036304,0.150660527,0.909386875,0.088015486,2.252106124,0.067146918,0.259663309,0.219538751,1.041639912,0.699365906,0.211910628,1.628910336,0.442207401,0.303389836,0.089296628,0.315437699,0.110684274,0.376228107,0.769919543,0.358746838,0.245698639,0.333343323,0.494320269,0.168502009,0.506466796,0.176265772,0.652706577,0.025453962,0.753146014,0.157912521,0.271144518,0.130823669,0.064210828,0.231601216,0.132756915,0.070855681,0.213656837,0.283890954,0.063069801,0.181211136,0.054980959,0.068455563,0.167369336,0.009888274,0.016456454,0.015692969,0.048524307,0.048067855,0.006269219,0.027375483,0.027317188,1.725378307,0.420675831,7.595422415,0.89996452,0.486126115,0.194705762,1.857230352,0.522190374,0.092057328,0.231675485,0.086475711,0.090088356,0.075877678,0.155627763,0.580511243,0.039871483,0.091696497,0.051402725,0.067799843,0.081450499,0.033441679,0.070604939,0.040294193,0.012450193,0.012385525,0.008593861,0.075762834,0.020086335,0.032375234,0.009049579
E06000038,2014,0.473531435,0.554379369,0.564715405,0.272033586,0.18062915,0.145448653,0.597514554,1.241966963,0.283221623,0.333518744,0.169606412,0.281661644,0.375981315,0.769267842,0.714202981,0.227397861,0.722838456,0.017079122,0.134531296,0.818156302,0.959628836,0.628174084,0.96097798,0.263892331,0.419752386,0.323684492,0.122747873,0.749822119,0.092273383,1.802431787,0.060920769,0.23224357,0.180191745,0.944942884,0.6012617,0.198724512,1.23199325,0.341764629,0.28101757,0.113809627,0.25908455,0.097016393,0.340720078,0.665936196,0.309480877,0.227909937,0.304224463,0.467546284,0.152851944,0.428314143,0.169241601,0.550441615,0.027798303,0.623352577,0.159652616,0.276222981,0.109119678,0.058575588,0.180158742,0.111388979,0.057246012,0.174873485,0.281761318,0.052639433,0.206203796,0.064722421,0.059471616,0.143317599,0.007021253,0.012201225,0.022805003,0.039008676,0.043687445,0.004850769,0.021863341,0.020539198,1.537883394,0.468308625,6.886558178,0.767345679,0.487400484,0.210600661,1.865842475,0.593062728,0.094018328,0.237644709,0.091237737,0.076695811,0.080442006,0.148774744,0.613772502,0.036025189,0.082632915,0.044492634,0.058635602,0.0696307,0.031232702,0.071322043,0.029645891,0.011007012,0.011550229,0.00838637,0.059491794,0.018523149,0.027814999,0.008043064
E06000039,2014,0.40939943,0.496495101,0.537461316,0.242487968,0.180444069,0.133672716,0.609298678,0.919093397,0.279253616,0.294241921,0.140697448,0.2135872,0.363079931,0.745345441,0.619635108,0.20941328,0.602342685,0.012617161,0.143902727,0.722384456,0.898299345,0.553116892,0.861534973,0.219189402,0.371153931,0.237429896,0.120707288,0.601850599,0.127016299,1.36850147,0.0510909,0.226491348,0.17072512,0.958190988,0.521909113,0.207465145,0.886865447,0.242661256,0.278164454,0.180222717,0.21924844,0.091172389,0.353839551,0.566785451,0.243542453,0.247443434,0.31071231,0.458100934,0.170157771,0.389698123,0.156115545,0.505442311,0.03420996,0.48461876,0.203723608,0.378095977,0.098023067,0.070317148,0.129559508,0.094803815,0.04548114,0.153576982,0.233098809,0.050688931,0.268047647,0.087702278,0.060888077,0.094941396,0.005399373,0.010983327,0.037879882,0.034490581,0.04502402,0.005639765,0.014487044,0.011193286,1.033504323,0.302048143,5.69092657,0.514850716,0.383404406,0.158321839,1.705625226,0.569155098,0.089564346,0.174487646,0.075299108,0.049073295,0.072003242,0.092775139,0.559981889,0.044128191,0.101218779,0.054778481,0.072489716,0.086183851,0.024338508,0.056380561,0.01793785,0.006121395,0.013988238,0.007380947,0.03814584,0.014487078,0.025813337,0.004833427
E06000040,2014,0.590017322,0.638805672,0.643719318,0.307445128,0.222632206,0.17376837,0.685157038,1.329124712,0.308431066,0.392237081,0.198681563,0.354915384,0.430344502,0.80552546,0.820903673,0.261711854,0.848791923,0.021053019,0.13976499,0.939473108,1.072716641,0.735327344,1.08189263,0.313615292,0.496311594,0.384003195,0.151923857,0.870345111,0.099863527,2.154725582,0.066252766,0.26060311,0.213592353,1.054343086,0.672729859,0.215404006,1.643516076,0.417795182,0.306114376,0.09254007,0.303009603,0.108573876,0.397670647,0.756372249,0.34524991,0.25561122,0.356301463,0.506570251,0.176252172,0.507441964,0.177206943,0.645027963,0.02556491,0.709878326,0.158891903,0.288502741,0.13457239,0.067836594,0.235877724,0.135876832,0.071182364,0.211418892,0.255417104,0.06420794,0.198297253,0.058439897,0.071838891,0.153639522,0.00916348,0.015691352,0.020674122,0.04857541,0.047605246,0.005935102,0.024116765,0.026045154,1.668571604,0.438998912,7.973343793,0.951701792,0.506302983,0.189142031,1.89004744,0.570023381,0.092816392,0.263645289,0.0888598,0.11313652,0.074876977,0.148381963,0.604230256,0.039496988,0.090371325,0.0507242,0.066971482,0.080606456,0.032642687,0.0715175,0.038148847,0.011921592,0.012259325,0.008462835,0.060791239,0.019979383,0.032028753,0.009192259
E06000041,2014,0.582811469,0.634947937,0.637541768,0.305587665,0.212849521,0.174269808,0.670046264,1.322024784,0.313385339,0.394146716,0.203267449,0.358760998,0.420359188,0.811318098,0.822302145,0.264261147,0.851510894,0.021983881,0.1362732,0.949529047,1.080166464,0.745894486,1.091681707,0.319620753,0.499098604,0.397696857,0.149699776,0.887820022,0.096773558,2.191899383,0.067424173,0.260942008,0.214151912,1.050402336,0.690802775,0.213152588,1.602565515,0.430219807,0.303803578,0.089115404,0.314585061,0.110022198,0.383147752,0.741221412,0.35206084,0.251864904,0.348059929,0.505423643,0.170181646,0.501751126,0.180192149,0.646172648,0.026247726,0.717708589,0.160336521,0.284254004,0.132214437,0.065455052,0.227766461,0.133262074,0.071186892,0.211178177,0.266166993,0.063354425,0.191789997,0.058068288,0.069525338,0.160144122,0.009402437,0.014922005,0.018934268,0.048874496,0.047603503,0.005964982,0.025171608,0.024671034,1.647539594,0.420853792,7.627549227,0.903187042,0.487181081,0.186333595,1.842157116,0.533150749,0.091165538,0.239516403,0.085304711,0.098980436,0.073414928,0.145577584,0.583660795,0.041023178,0.09466315,0.052646789,0.069191912,0.083561709,0.031587095,0.069612678,0.040085175,0.010633416,0.012727918,0.008131361,0.072378726,0.020361454,0.032205379,0.008671212
E06000042,2014,0.492232728,0.567710383,0.575254069,0.288345195,0.179532557,0.151893801,0.598120788,1.284739801,0.292708869,0.352442923,0.18306382,0.301770102,0.372741254,0.800564134,0.735611009,0.237053936,0.753183934,0.017275271,0.136967699,0.855730078,0.991825977,0.660655181,1.001077037,0.284926557,0.440731472,0.351173799,0.127882411,0.808080378,0.091169608,1.94232423,0.064766266,0.238642459,0.192905354,0.982201989,0.642209938,0.200524748,1.292844097,0.373474463,0.286236713,0.116849813,0.284616956,0.103604162,0.349422196,0.679047187,0.322158141,0.228494616,0.307036426,0.473023319,0.155397745,0.44403748,0.178549041,0.573241963,0.026636332,0.646877168,0.164661625,0.296313118,0.113241716,0.059463355,0.180670376,0.111377095,0.059921191,0.183395302,0.296636367,0.053393068,0.204333143,0.065071159,0.060605632,0.150604718,0.007844636,0.013456733,0.018710653,0.040952079,0.046262453,0.004881832,0.022656141,0.020276287,1.47656673,0.403669392,6.507759345,0.722757476,0.445231171,0.193102823,1.81794341,0.527181449,0.088441307,0.207259927,0.081859708,0.073459669,0.074193637,0.13433539,0.559825775,0.041954515,0.096525796,0.052698163,0.069667362,0.083085325,0.02973678,0.064405688,0.031077967,0.009641173,0.013233177,0.007567431,0.07846215,0.017598381,0.027614822,0.007750335
E06000043,2014,0.500184497,0.5946513,0.592012738,0.280734427,0.190402514,0.158283973,0.611678774,1.455218728,0.29191679,0.355940521,0.184841125,0.3212277,0.390668542,0.797076215,0.775656695,0.243828286,0.783381042,0.018093202,0.134049634,0.876905752,0.997904589,0.680317876,1.040777413,0.293220113,0.451014881,0.362615933,0.133049756,0.815090492,0.085701963,2.038060763,0.065087721,0.239621794,0.202033496,0.977000398,0.646480531,0.206523501,1.369643921,0.394704235,0.291540008,0.082604759,0.282152026,0.101783272,0.347138374,0.702965171,0.331899389,0.230134281,0.307105706,0.470827498,0.156388395,0.454395957,0.174500014,0.588603211,0.02626497,0.690758672,0.153769351,0.243483865,0.115490647,0.060505043,0.194025103,0.114319847,0.067703566,0.192195651,0.328808743,0.056515663,0.190078117,0.059435024,0.061103454,0.162677638,0.008010375,0.013970544,0.017409308,0.04375859,0.042691008,0.004936963,0.025727734,0.026407454,1.74345269,0.49606257,7.400530954,0.808320542,0.515575153,0.229315417,1.965564818,0.542639562,0.099305094,0.253954493,0.096132418,0.077575091,0.083661964,0.186065472,0.643301433,0.031792463,0.07315385,0.040501537,0.053630546,0.064205587,0.03291684,0.074003917,0.033539109,0.013021174,0.009924945,0.009076593,0.076634264,0.020122697,0.029413797,0.011734143
E06000044,2014,0.480999614,0.558187837,0.561137176,0.284773247,0.170102558,0.148982803,0.563246199,1.421603821,0.286378852,0.345301832,0.183797806,0.31543478,0.351929122,0.79321251,0.752777272,0.234004372,0.754483371,0.016042937,0.125082154,0.85214226,0.956388433,0.667719214,1.01696678,0.290740832,0.433837063,0.361218565,0.119975807,0.79957348,0.078408375,2.013455421,0.064650022,0.228027187,0.196997007,0.934639323,0.640300265,0.190938742,1.277272957,0.39041996,0.279377976,0.087473146,0.284117806,0.100931672,0.31905876,0.695816915,0.323665731,0.213381176,0.2842793,0.441861899,0.146601901,0.431817498,0.170172782,0.579819128,0.02507297,0.664989978,0.151309203,0.242373439,0.111423335,0.054964654,0.1743846,0.110709053,0.063437814,0.186381013,0.337931154,0.053909787,0.17355367,0.057204472,0.056418218,0.159360494,0.008687161,0.011591597,0.013170677,0.042239829,0.042089848,0.004696707,0.024764151,0.023402796,1.608560653,0.465421816,6.700104354,0.703407529,0.463345561,0.218117145,1.818537011,0.504248487,0.094577944,0.209652039,0.085942174,0.062635284,0.079681454,0.164916355,0.56960212,0.035354191,0.081296298,0.044473373,0.058733248,0.070121621,0.029892164,0.069009118,0.032559951,0.012831731,0.011126968,0.008009004,0.081439422,0.018792269,0.026809643,0.00856007
E06000045,2014,0.465710076,0.546800148,0.555617686,0.274264068,0.172408657,0.147564785,0.568062626,1.370821999,0.281503229,0.331718902,0.175927636,0.296735862,0.353713769,0.778257478,0.725836125,0.228262081,0.726646687,0.015366808,0.127189608,0.825512004,0.933537002,0.644865157,0.987411615,0.277030948,0.419579514,0.337989504,0.11939796,0.75364361,0.084288436,1.898379017,0.061799143,0.226155741,0.191831806,0.924560977,0.613705744,0.19406345,1.222197882,0.363998585,0.279083612,0.097032302,0.27296397,0.098191475,0.32402051,0.689061702,0.309097332,0.21863282,0.285741009,0.434398204,0.14929978,0.422294452,0.164317615,0.565214838,0.02640308,0.634754954,0.156374208,0.25716274,0.109191899,0.057352355,0.167426107,0.107445809,0.062054205,0.180761708,0.32780499,0.05342906,0.185042046,0.0608967,0.057341076,0.151559615,0.007968793,0.012176511,0.016902661,0.040846725,0.042076506,0.00487589,0.022839607,0.022679023,1.594144784,0.465220578,6.71492825,0.69964417,0.461427363,0.216559665,1.831186834,0.521244275,0.093197711,0.210773041,0.086981338,0.063327831,0.079520282,0.163777511,0.577016017,0.033492411,0.076875116,0.041667266,0.055002995,0.065702202,0.031451275,0.06990618,0.031440213,0.012666286,0.010657421,0.008048521,0.082487899,0.019149161,0.026072347,0.00849787
E06000046,2014,0.592110793,0.627817553,0.644209477,0.329477366,0.205681637,0.189290721,0.653807827,1.629569218,0.32024113,0.41332661,0.230668686,0.395427116,0.403272763,0.827660678,0.874849765,0.273214145,0.888631961,0.019334759,0.127948779,1.005796434,1.074396109,0.827298865,1.186527567,0.377130286,0.538390518,0.420100207,0.15545307,0.995405447,0.080485487,2.451063139,0.067605362,0.25767388,0.253655789,1.058655008,0.717629299,0.218918288,1.614287845,0.495597579,0.323787129,0.072387399,0.348323407,0.121355787,0.395065968,0.822435502,0.347214987,0.249473442,0.336181499,0.457023364,0.170031654,0.517250496,0.169147482,0.704743778,0.025060722,0.736160696,0.165732663,0.293136658,0.149065699,0.064703975,0.181500733,0.142783186,0.085368173,0.244135461,0.351447494,0.072056377,0.161341257,0.059203234,0.072625477,0.171848566,0.012034375,0.013667579,0.012944219,0.054548287,0.051430132,0.006847194,0.026553114,0.034270387,1.657971696,0.354475268,7.201276666,0.808527887,0.386294604,0.172152276,1.701001227,0.34821083,0.087795403,0.171408427,0.069390335,0.064266525,0.066553622,0.146544317,0.484300027,0.033711316,0.077954954,0.04354128,0.057795868,0.069705173,0.029140402,0.058152905,0.034575573,0.014207953,0.010274612,0.007163894,0.097542387,0.018714828,0.031688697,0.009413992
E06000047,2014,0.548176085,0.604957201,0.612965183,0.313052168,0.187046602,0.171457565,0.607270021,1.568947774,0.306079197,0.384028839,0.210637242,0.36687925,0.38169628,0.818514876,0.828950759,0.258788346,0.840245455,0.018414604,0.125383544,0.949367372,1.030601737,0.764671679,1.121896598,0.342700658,0.494955046,0.405825846,0.13820272,0.92312989,0.076433014,2.310762655,0.067934023,0.245447138,0.230058388,1.004987026,0.700055035,0.202703546,1.518926637,0.461634588,0.302781456,0.074260651,0.322541362,0.11169577,0.353176828,0.765453029,0.348085239,0.229245794,0.310885079,0.450491301,0.158950279,0.483368834,0.170995814,0.649962399,0.02450481,0.728601596,0.154525253,0.262034149,0.130342294,0.060324225,0.191283985,0.12854251,0.075747871,0.220941188,0.350319069,0.062270156,0.159621679,0.05477221,0.064243845,0.172353083,0.010725206,0.012884944,0.011936879,0.04908727,0.04632906,0.005950822,0.027357229,0.028606357,1.651945979,0.385448573,6.969676778,0.782551975,0.41827909,0.185973079,1.771593297,0.411106133,0.088466963,0.189060697,0.075504234,0.06350986,0.071137485,0.154197606,0.516691687,0.033113737,0.076484432,0.042296273,0.055882815,0.067056126,0.028200664,0.064290555,0.036091338,0.013716737,0.010322805,0.007123962,0.110909319,0.019145191,0.029108866,0.009242749
E06000049,2014,0.568143895,0.619191854,0.624648328,0.311547706,0.19888913,0.176239336,0.63353132,1.465872312,0.311342876,0.392783562,0.213085377,0.369129605,0.398906368,0.805275294,0.83674783,0.26256074,0.854673289,0.019048483,0.127967046,0.964718898,1.051673516,0.770932642,1.121527458,0.341130276,0.508572583,0.405250795,0.146252136,0.929637385,0.081028974,2.297428859,0.065594959,0.252872872,0.227946401,1.025690359,0.696180264,0.210011581,1.589749413,0.45949472,0.304455073,0.076249239,0.322206293,0.112681381,0.370381343,0.777275649,0.347223087,0.240728851,0.326677233,0.466749146,0.163507268,0.49913842,0.170897185,0.658790355,0.02434981,0.737733107,0.153033982,0.273631664,0.134386768,0.06221203,0.207297689,0.134632046,0.075332634,0.221551069,0.306645277,0.065278861,0.166819466,0.055368925,0.068122617,0.169092574,0.010783341,0.013542858,0.013442578,0.049829593,0.049579681,0.006368452,0.02744187,0.030073743,1.674892293,0.390879891,7.259935485,0.841168208,0.436877713,0.182970008,1.767995801,0.44044684,0.088141196,0.198534116,0.077736336,0.072132133,0.071768279,0.151837324,0.530175607,0.034603153,0.079944958,0.044526467,0.058753732,0.070672,0.030249899,0.064860282,0.037856291,0.012878527,0.010734518,0.007775258,0.085924839,0.018835979,0.031273821,0.009480061
E06000050,2014,0.560459273,0.614190275,0.617888385,0.307735014,0.194796224,0.172877362,0.623156978,1.467596463,0.307656504,0.387230026,0.209838932,0.366805866,0.393177735,0.802435207,0.831751818,0.258626488,0.845910056,0.019047913,0.126324498,0.951489677,1.038163484,0.759730496,1.111039406,0.335338116,0.499718764,0.403281042,0.142305394,0.915006079,0.079896452,2.277278039,0.065911927,0.248905908,0.225392616,1.012229343,0.690885264,0.205831432,1.561400031,0.453672889,0.300752287,0.072690649,0.318084311,0.110899714,0.361025378,0.764925901,0.34662108,0.235806769,0.319831049,0.460557467,0.161478324,0.491413375,0.169792123,0.649524508,0.024195956,0.733194961,0.14947898,0.260465475,0.130994243,0.061269579,0.20470522,0.132408867,0.074953155,0.217890928,0.311503271,0.064067998,0.162956068,0.053375255,0.066271598,0.168138058,0.010536049,0.013703603,0.012749733,0.049127105,0.047712797,0.006174244,0.027015104,0.028882603,1.664070501,0.406979451,7.223404708,0.832677365,0.441476089,0.187610343,1.759276752,0.448107075,0.08914016,0.202194123,0.079382166,0.070966308,0.073242899,0.154531764,0.535180137,0.033955785,0.078453665,0.043589324,0.057584114,0.069105952,0.03058764,0.065458917,0.037763851,0.013541751,0.010552203,0.007787369,0.088675317,0.018904735,0.030347841,0.008955318
E06000051,2014,0.566296176,0.612023952,0.620367338,0.312643089,0.197575335,0.179180316,0.627751676,1.504351031,0.309919708,0.392564042,0.21520729,0.372048736,0.393867967,0.797995532,0.833672353,0.262608944,0.854795832,0.017881699,0.125279993,0.964226479,1.036155694,0.778182088,1.123417846,0.346449368,0.51285868,0.403711659,0.146675992,0.926333393,0.079166643,2.301200012,0.063935359,0.250101254,0.230910142,1.017837909,0.690477949,0.21069161,1.582705545,0.462716725,0.303924306,0.072982449,0.323759401,0.113475821,0.368448348,0.800984374,0.339547396,0.241284511,0.325977362,0.451441497,0.163324989,0.497932477,0.165084971,0.660781181,0.02408339,0.741406171,0.15188395,0.272532757,0.136576935,0.062546172,0.194542261,0.134626194,0.078925832,0.225969843,0.316292833,0.067036251,0.159093605,0.055120333,0.068843583,0.170393131,0.011109,0.012585645,0.012947378,0.050547245,0.049250994,0.006404936,0.026908878,0.033582246,1.670887863,0.377133178,7.211109873,0.816080939,0.418158669,0.180083756,1.745367193,0.395423831,0.089036796,0.185783838,0.074814409,0.068194833,0.070398579,0.155122151,0.517188344,0.03347868,0.077452471,0.043468317,0.057460112,0.069315502,0.029390215,0.062005269,0.035909937,0.012611933,0.010382597,0.007840954,0.090586519,0.0185815,0.031936546,0.010448824
E06000052,2014,0.583954837,0.632350173,0.639281759,0.326615704,0.202817298,0.188886185,0.646445687,1.619255697,0.322491393,0.409931233,0.226518271,0.390102403,0.405461067,0.824721773,0.866097694,0.272732633,0.885900056,0.017606828,0.12822525,1.000012371,1.071071339,0.811907896,1.170583245,0.368097851,0.532575648,0.419939738,0.15226891,0.973348115,0.080643024,2.402975659,0.067086336,0.25640594,0.244140746,1.052996652,0.713636398,0.219312168,1.593771292,0.485438098,0.316523324,0.076264986,0.337160787,0.120795993,0.387115024,0.824204765,0.343618965,0.249396867,0.334381641,0.460455781,0.168334966,0.515533951,0.168583978,0.686126482,0.02506788,0.755083471,0.160721875,0.277555508,0.143226081,0.064550922,0.180206771,0.139541255,0.08262824,0.237343235,0.33890157,0.07034683,0.164420487,0.058664307,0.070973672,0.173783456,0.011704189,0.013125742,0.012862995,0.052699212,0.050226653,0.006688843,0.027196787,0.036014185,1.660166459,0.367045374,7.256239764,0.805083485,0.408469678,0.179990216,1.764221071,0.349579189,0.09297595,0.177610509,0.074112897,0.066809765,0.070597775,0.159242321,0.516049218,0.034465209,0.079671633,0.04432264,0.058498841,0.070452616,0.02855965,0.058866345,0.033719922,0.013063255,0.010675039,0.008057061,0.092802188,0.018946691,0.033317469,0.011279179
E06000053,2014,0.648642561,0.641589038,0.721988674,0.333001724,0.242346421,0.196764675,0.733843132,1.499627765,0.325814917,0.412636671,0.237866069,0.391914705,0.448905509,0.785658996,0.906060586,0.281385569,0.887176931,0.019612643,0.157463884,1.027904996,1.048669828,0.856656459,1.192028904,0.37260783,0.563417938,0.405037445,0.179715217,1.122473304,0.093869907,2.379957896,0.069970034,0.296270962,0.281095927,1.198067894,0.676182564,0.237030972,1.66029303,0.47111659,0.352892851,0.085155247,0.400887471,0.135003186,0.451529811,0.87634713,0.344581244,0.310910546,0.410427604,0.539694691,0.196735832,0.547139851,0.172789947,0.771213502,0.029075166,0.787597133,0.157833195,0.321547477,0.147665604,0.074243023,0.20843124,0.160847151,0.099934835,0.256409859,0.374270718,0.074648748,0.192395848,0.058622693,0.087943636,0.180889415,0.012442648,0.012950225,0.018866886,0.060751879,0.061746451,0.008677567,0.023711421,0.014943296,1.711673078,0.408108903,7.36213521,0.865799843,0.406089052,0.16918754,1.621502494,0.437444486,0.086262561,0.193381444,0.079435742,0.041009902,0.071639493,0.13119465,0.508339119,0.023588689,0.097989807,0.033631833,0.043934411,0.054384074,0.020980583,0.060820193,0.021234216,0.013429816,0.005227599,0.006086954,0.020086285,0.010720622,0.024668197,0.004221205
E06000054,2014,0.575234152,0.628947018,0.63314783,0.317337787,0.199294086,0.179913098,0.642909288,1.5041975,0.320655096,0.401005294,0.216682643,0.371955538,0.402327845,0.829631006,0.852987652,0.267693943,0.870264342,0.018337772,0.130417457,0.985418337,1.071956004,0.783891688,1.14093146,0.346078604,0.517278709,0.414544803,0.147617263,0.934810275,0.083209212,2.328811517,0.067304865,0.257211186,0.229867598,1.042344152,0.714286229,0.214754564,1.595164419,0.462839072,0.308163724,0.085408087,0.327431201,0.114769576,0.372025203,0.796418435,0.352700324,0.244725273,0.330321242,0.474691764,0.166867159,0.508029848,0.173871977,0.668808658,0.02486505,0.753104693,0.160314704,0.277266121,0.13523706,0.063823019,0.204510771,0.133621603,0.075766598,0.22419554,0.313770022,0.066441253,0.170918909,0.056610926,0.069034726,0.173017222,0.010935894,0.013794604,0.013933299,0.050366876,0.049170185,0.006260024,0.027907156,0.032340522,1.66964655,0.382392631,7.305624865,0.826744055,0.439774135,0.18744093,1.813937221,0.430556897,0.092518871,0.195169976,0.078685285,0.07251381,0.073947716,0.154741991,0.537645363,0.038470886,0.08896044,0.049421057,0.065398114,0.078637597,0.030595877,0.06474852,0.037290838,0.012623232,0.011961971,0.008120339,0.08594659,0.01949982,0.032669086,0.009997988
E06000055,2014,0.512243216,0.573405084,0.588994943,0.2826142,0.191037259,0.159411277,0.617518288,1.25208003,0.293675408,0.356698469,0.187324698,0.30825255,0.382498473,0.781257905,0.746996707,0.240248399,0.759880651,0.016328944,0.132909844,0.879165337,0.988145455,0.676686276,1.011909688,0.290256361,0.458378467,0.349022323,0.138085916,0.802888587,0.097349385,1.962349422,0.060243259,0.241463502,0.20169425,0.987847722,0.63116337,0.20629652,1.352566677,0.380475488,0.289660146,0.105827798,0.280941212,0.105055122,0.371690113,0.712047068,0.311173793,0.239487636,0.318397973,0.463359918,0.165906992,0.462694022,0.165401481,0.597915176,0.027899261,0.646572563,0.160483312,0.307575695,0.119184579,0.063191251,0.185269692,0.120394736,0.06508444,0.190275852,0.267616096,0.059949328,0.208364355,0.066434473,0.066579092,0.145975829,0.008952777,0.013891639,0.020422211,0.042945565,0.048319011,0.005713132,0.023586304,0.024596673,1.471218232,0.385332866,6.731502221,0.750585929,0.439167737,0.183214592,1.758863171,0.499997991,0.087545594,0.19440569,0.078712224,0.076052375,0.075157641,0.13716338,0.537476601,0.038862903,0.089200835,0.049493258,0.065172079,0.07845229,0.030707706,0.063814136,0.031117144,0.010593017,0.012047598,0.007822447,0.063875485,0.017425002,0.028307798,0.007943326
E06000056,2014,0.570155208,0.620326799,0.621509384,0.307281493,0.201382869,0.171390317,0.639754742,1.396787443,0.307599868,0.386111461,0.203903336,0.352868872,0.404236315,0.807124362,0.807164939,0.260803852,0.842226662,0.01979334,0.132769592,0.941455276,1.049994436,0.733971582,1.084913254,0.319516905,0.494388255,0.396718278,0.147482836,0.893320663,0.085607839,2.205418415,0.065064775,0.253954018,0.215546379,1.025259645,0.685472787,0.207505787,1.590100568,0.435869891,0.299135919,0.094311487,0.308038614,0.108261784,0.368515942,0.758906586,0.35026486,0.240696188,0.325510073,0.484758085,0.165959468,0.495510326,0.173948012,0.636287548,0.025833979,0.733845527,0.152652061,0.271068984,0.129236213,0.063632525,0.228107964,0.129681657,0.068965103,0.209474847,0.279071885,0.061587434,0.178754816,0.055146793,0.067639519,0.166478366,0.00972281,0.015471753,0.014707485,0.04793894,0.048082521,0.006020982,0.026521283,0.027491652,1.688971962,0.417575797,7.42614777,0.87432038,0.480837479,0.194178219,1.85684044,0.503341586,0.091347404,0.221900122,0.083148957,0.088590743,0.074843472,0.151923499,0.570236282,0.036860864,0.085022874,0.046968491,0.061973731,0.074384633,0.033159475,0.069797974,0.039461077,0.011916952,0.011554617,0.008457421,0.070886629,0.019451015,0.031690565,0.009589109
E06000057,2014,0.571018396,0.621030163,0.631464553,0.318585795,0.19452597,0.180727689,0.630784791,1.58018626,0.312940923,0.397952473,0.220799632,0.383553627,0.395321149,0.82053522,0.853763257,0.265735582,0.868572954,0.018731495,0.126439887,0.979251354,1.055110703,0.796963613,1.15139502,0.358895423,0.519188242,0.415090558,0.147527946,0.960308744,0.078738483,2.378102694,0.066862397,0.251888029,0.240958748,1.036733721,0.710221867,0.210030267,1.584766001,0.478102666,0.311202006,0.070030147,0.335023334,0.115779092,0.373728474,0.793878128,0.348852315,0.23973889,0.325998037,0.45445987,0.164408649,0.502427915,0.169165441,0.673122941,0.024307778,0.746118804,0.156871275,0.276807062,0.138970758,0.062749198,0.19344704,0.135915525,0.079339476,0.23204237,0.341765412,0.066822471,0.160285053,0.055960239,0.068389367,0.175054526,0.011324192,0.012999116,0.012457003,0.051297065,0.049256985,0.006565929,0.027564559,0.031470683,1.664561879,0.363908264,7.096161913,0.810737596,0.40397106,0.176901392,1.730197475,0.384189726,0.087844073,0.179729136,0.07272348,0.064449724,0.069422535,0.148629109,0.501348508,0.033459597,0.077602795,0.043327445,0.057447008,0.069149698,0.028513865,0.06131876,0.036033396,0.014123703,0.01032761,0.00744,0.105011565,0.018672441,0.030714538,0.009637989
E07000004,2014,0.558023706,0.615171063,0.616576012,0.304770799,0.199484399,0.172216721,0.641353763,1.375930854,0.309745149,0.387421432,0.202846329,0.347858852,0.403314098,0.815990582,0.807725957,0.257752024,0.838502549,0.018439174,0.134359529,0.941770832,1.051342242,0.731085492,1.084735235,0.319010845,0.492383848,0.394513125,0.146801113,0.887673857,0.088810067,2.177121802,0.066420335,0.253575716,0.213979069,1.033805496,0.685521115,0.210849731,1.528796339,0.430860112,0.299993346,0.099710967,0.308651594,0.110768431,0.375198947,0.741162943,0.346246849,0.242495322,0.326623422,0.485829754,0.165852158,0.493278336,0.176906392,0.630269669,0.0256068,0.718310361,0.158358919,0.28023194,0.126679908,0.064094424,0.208460895,0.126659605,0.067914125,0.20803758,0.28445372,0.061772421,0.18705766,0.059207776,0.067346395,0.1664883,0.009332682,0.016652962,0.015685392,0.047375994,0.047976222,0.005932995,0.025520531,0.027438168,1.641699398,0.411974207,7.259122131,0.833648836,0.468118896,0.192277166,1.851389485,0.488564238,0.091358465,0.212140136,0.082845211,0.089461816,0.075240672,0.153009438,0.563168479,0.040367325,0.092487826,0.051309215,0.067721261,0.081466664,0.033878702,0.067418535,0.038394098,0.011697384,0.012524306,0.008323262,0.074930821,0.019126716,0.031914476,0.009303468
E07000005,2014,0.596349782,0.630860277,0.642507011,0.307675084,0.221641688,0.18109675,0.683409952,1.301749041,0.316923024,0.402534194,0.212016675,0.360239687,0.420882927,0.804581938,0.825870344,0.269885329,0.855211974,0.021748525,0.135842683,0.968541119,1.085322303,0.771671634,1.101828456,0.329321036,0.517040883,0.396462098,0.155451984,0.894177949,0.099311043,2.223936329,0.065050505,0.262941486,0.223241676,1.059283734,0.68701386,0.219008545,1.617554536,0.438878874,0.307949745,0.084295516,0.320008634,0.112602908,0.400279164,0.762148739,0.338554132,0.260561213,0.360706223,0.498164769,0.17448987,0.516001898,0.174818485,0.667940258,0.027021385,0.707351434,0.170029623,0.303323738,0.140541338,0.066575748,0.219554084,0.137479824,0.075754621,0.221502136,0.261451062,0.068697922,0.192798799,0.06051086,0.073906596,0.153832285,0.010118048,0.015449224,0.020277672,0.050955685,0.050111978,0.006094172,0.024609621,0.026333112,1.586530565,0.380485119,7.561134043,0.870285763,0.452523784,0.171078167,1.747607812,0.473800826,0.089050657,0.21962577,0.077926347,0.101499191,0.069197231,0.138198679,0.549824964,0.042078547,0.097504328,0.054812274,0.072356729,0.087290689,0.030838126,0.066911476,0.037023268,0.009476096,0.013094576,0.00779468,0.069866024,0.020050802,0.031623003,0.008070926
E07000006,2014,0.583993343,0.626539797,0.64429111,0.308119875,0.21556966,0.176266763,0.678323329,1.290989526,0.312604564,0.392606061,0.20851467,0.351820193,0.417659582,0.813494825,0.820916742,0.262474351,0.840851131,0.020081371,0.136337638,0.956433867,1.071359178,0.759827887,1.098909703,0.321212918,0.511892787,0.383814935,0.148849886,0.875423942,0.100100657,2.191010522,0.064004031,0.261442939,0.222126827,1.05408202,0.683837495,0.220070097,1.598032066,0.429737773,0.312443942,0.091942839,0.313792004,0.113291147,0.40441964,0.759295442,0.340342366,0.257768145,0.353221362,0.492157335,0.176128059,0.508241339,0.17509171,0.664785793,0.026924395,0.692014374,0.168785544,0.327184034,0.139204307,0.067105484,0.219702603,0.137121569,0.075043922,0.216381592,0.270017719,0.067976243,0.198244102,0.0628599,0.074060686,0.1532763,0.01007338,0.017115297,0.021033007,0.048959062,0.052518279,0.006314402,0.023507286,0.026237332,1.598850687,0.40246203,7.535412262,0.871582871,0.454071759,0.176976447,1.754879321,0.518549639,0.087010405,0.211528806,0.077968519,0.096114876,0.073406798,0.136130153,0.5296711,0.037609621,0.08747134,0.047898669,0.064240852,0.076861063,0.033638928,0.067483238,0.038675305,0.012578281,0.011710019,0.007184704,0.068702317,0.019018854,0.029282525,0.006915834
E07000007,2014,0.545025376,0.599566305,0.609814336,0.290541628,0.20179684,0.166524324,0.645956512,1.273100042,0.302483856,0.375366755,0.194285981,0.332177747,0.400850321,0.791355972,0.788096623,0.249955941,0.80591114,0.018388275,0.132911224,0.905295505,1.027032964,0.707023999,1.044213142,0.302677952,0.477197253,0.366885843,0.143654109,0.8393438,0.097061023,2.055604512,0.064362352,0.249208101,0.20468989,1.016308467,0.652511492,0.208311257,1.481134169,0.401616698,0.296536377,0.093888747,0.296415236,0.107417568,0.377032261,0.735396215,0.327548166,0.243407427,0.335712399,0.48118,0.166933631,0.479965115,0.171416597,0.619108479,0.026112678,0.678099154,0.159602695,0.291874134,0.127140379,0.064237218,0.20658468,0.126537648,0.067884397,0.201663621,0.262884581,0.062591077,0.199268617,0.061551884,0.066570976,0.151437447,0.008921288,0.015670445,0.019564692,0.045316202,0.047933172,0.005648285,0.024447212,0.026288053,1.553705094,0.425125019,7.282418501,0.839352356,0.467397243,0.186525688,1.797525448,0.516118136,0.092007219,0.2164398,0.082240113,0.092002931,0.074534135,0.143153379,0.557181263,0.039995385,0.092086728,0.051233703,0.06765757,0.08144692,0.032244043,0.067157822,0.035154816,0.011188304,0.012429377,0.008241783,0.062632774,0.01880285,0.029983895,0.008147054
E07000008,2014,0.481745989,0.557234309,0.574988376,0.265637085,0.187723041,0.147475883,0.607145123,1.318546465,0.279176941,0.329901024,0.170794773,0.287511574,0.387017097,0.761659239,0.716864842,0.227520972,0.730686571,0.017856167,0.134226565,0.827772398,0.958305205,0.632093489,0.969701769,0.267530054,0.423740635,0.328174482,0.128287653,0.748684448,0.092453248,1.829716565,0.058375798,0.232262294,0.187081985,0.947727909,0.596761225,0.201171452,1.299112562,0.352234205,0.282547244,0.102367385,0.255484918,0.096522193,0.356454029,0.694012179,0.312121954,0.230481556,0.304703015,0.45615891,0.161342524,0.437128648,0.161054201,0.558041753,0.027886086,0.633722463,0.152149933,0.262152864,0.110706924,0.060944164,0.188874259,0.113648556,0.061112525,0.179502784,0.281759934,0.054974301,0.197115325,0.062458312,0.060653007,0.148489297,0.007231503,0.013653164,0.024033363,0.040611601,0.045806008,0.005234807,0.022637144,0.020384133,1.728184139,0.499531393,7.39108315,0.826462164,0.517687909,0.224565407,1.930551572,0.606691776,0.094982967,0.268249585,0.098299145,0.092727042,0.083598645,0.173474789,0.650575331,0.032061783,0.073844015,0.04027047,0.05287652,0.063225082,0.035700549,0.079629018,0.031656098,0.014915751,0.010053767,0.008825237,0.070031878,0.018377246,0.026943819,0.009537063
E07000009,2014,0.563339599,0.618588004,0.615541137,0.310195491,0.197611039,0.174015417,0.629704734,1.413802841,0.30799195,0.38925695,0.206101229,0.361836302,0.396626464,0.790463234,0.822068056,0.258622778,0.851241723,0.018712614,0.126122234,0.948582699,1.043116933,0.75186425,1.101763776,0.330926418,0.496685326,0.402942212,0.142558792,0.904920098,0.081074956,2.240578748,0.066155589,0.252750671,0.217884687,1.011334032,0.68497071,0.209089234,1.54683378,0.442504773,0.300057069,0.082814971,0.315026284,0.109501144,0.362348369,0.751723191,0.349093915,0.239143218,0.321655101,0.468687722,0.162241671,0.489780233,0.173358288,0.63906667,0.024085889,0.72460531,0.151639641,0.255795857,0.129883531,0.061631023,0.20635035,0.130475759,0.072748927,0.214663879,0.29208655,0.062298611,0.164510247,0.054575341,0.06709053,0.168016894,0.009834184,0.013194261,0.013244274,0.049103041,0.045960376,0.006160423,0.026047376,0.030129208,1.642287596,0.401346236,7.271260909,0.839126621,0.44965388,0.184832402,1.81580072,0.444185278,0.090948184,0.206995511,0.080929024,0.069094968,0.072427167,0.15333385,0.549741827,0.037099598,0.085610519,0.046876301,0.061765705,0.074099975,0.029632898,0.065041968,0.039538866,0.011620515,0.011555531,0.008609868,0.081983241,0.019058773,0.033181381,0.009434661
E07000010,2014,0.556484588,0.610931764,0.617203165,0.310749337,0.192335596,0.17245258,0.613788421,1.442186583,0.310582377,0.38256039,0.209592379,0.361462947,0.3880102,0.794174487,0.82870599,0.25706369,0.83633194,0.017479115,0.125061952,0.9526538,1.021894296,0.756854073,1.105247464,0.333197039,0.507211223,0.398205408,0.144023408,0.904385912,0.080917643,2.264461061,0.063549718,0.246748121,0.226087747,1.003856809,0.684375344,0.206569103,1.585578466,0.449201176,0.303602618,0.076217515,0.315089653,0.110990087,0.366599322,0.798297801,0.337633499,0.237794185,0.323811971,0.450653682,0.163709936,0.492718683,0.164585098,0.654882703,0.025075715,0.73946372,0.146288138,0.276842882,0.134030788,0.06234693,0.206091057,0.136461433,0.07481706,0.217406999,0.305965621,0.06520213,0.16286028,0.053910188,0.068319312,0.17601495,0.01160409,0.012824218,0.013535743,0.047534706,0.049881751,0.006357802,0.026426715,0.034416683,1.607549133,0.394707413,7.133599368,0.814060069,0.428566925,0.181143155,1.709153588,0.453205617,0.086501408,0.183094598,0.074681445,0.065342447,0.072592264,0.146156537,0.510005034,0.03477027,0.079651172,0.044809741,0.059074455,0.070677997,0.029243467,0.063010066,0.036267405,0.014285525,0.010821368,0.00716067,0.090758628,0.018464944,0.029953789,0.008806524
E07000011,2014,0.582298941,0.633502222,0.629924856,0.311017132,0.198894068,0.172195468,0.638581853,1.432467859,0.313294393,0.388524569,0.206274797,0.364711935,0.406317793,0.810659073,0.830593258,0.261244734,0.856399707,0.019680869,0.127889895,0.955921314,1.057809864,0.745030875,1.098796655,0.325917347,0.503007333,0.404378477,0.148370017,0.904117131,0.083603367,2.240362693,0.0647287,0.255215753,0.220655705,1.025933601,0.693561793,0.206594708,1.633898635,0.447277132,0.301019667,0.084879034,0.307213157,0.108910005,0.364219976,0.78067712,0.354251028,0.241088312,0.329690525,0.478565024,0.166693287,0.501742086,0.171352587,0.646744886,0.025262939,0.761757426,0.146894092,0.25736161,0.131904449,0.064358358,0.238187194,0.134472128,0.070897719,0.212123133,0.280706978,0.063201387,0.169769886,0.051968542,0.067601267,0.172692222,0.010586267,0.014190107,0.013462325,0.048657815,0.048685665,0.006330169,0.027680763,0.028451231,1.732794507,0.428721566,7.588542065,0.909955052,0.491278007,0.196694946,1.856228496,0.505535038,0.091328485,0.221877889,0.084883721,0.084847281,0.077632279,0.160059547,0.568881368,0.036920903,0.085486636,0.047558502,0.062633634,0.075293593,0.033161684,0.070802662,0.039101424,0.013587164,0.011419091,0.008650251,0.066103616,0.019688667,0.032395693,0.009236165
E07000012,2014,0.583427069,0.630062095,0.628199599,0.304636659,0.209420697,0.174098541,0.654513247,1.331799577,0.31044642,0.392705756,0.204088642,0.360631387,0.412934419,0.788002352,0.819444567,0.262371762,0.852842043,0.020808874,0.130014604,0.946772388,1.059538333,0.745083527,1.086359302,0.322004478,0.501738341,0.397486155,0.148216982,0.892001891,0.087984844,2.202916733,0.065487546,0.256134813,0.216091414,1.023535289,0.68057051,0.209900493,1.607231465,0.436414191,0.299737135,0.081604425,0.310398691,0.108451476,0.370526826,0.744989807,0.346278157,0.246097935,0.337585565,0.487522351,0.165407916,0.500337409,0.173193234,0.643209449,0.024826309,0.725738497,0.152435011,0.26720606,0.131868053,0.063980756,0.228332918,0.134056746,0.07192174,0.212649702,0.258811783,0.063735173,0.175208231,0.054609831,0.069118889,0.163078802,0.009805608,0.014693045,0.015827985,0.049045637,0.047575699,0.006006564,0.025527779,0.027562862,1.654688948,0.420546941,7.566168225,0.904954102,0.478159575,0.184537287,1.814710615,0.500215607,0.091362288,0.229079348,0.083270447,0.088638162,0.073324133,0.146899901,0.569549777,0.038841293,0.089192396,0.049583446,0.065461756,0.078644892,0.030881849,0.068588972,0.04080342,0.011660287,0.012064746,0.008577623,0.071187926,0.019703917,0.032784564,0.009097416
E07000026,2014,0.569447179,0.617473976,0.629465783,0.322983212,0.194013592,0.179358385,0.628203385,1.598227945,0.315561954,0.396957341,0.221031599,0.378928957,0.390106415,0.828171895,0.858986942,0.264386027,0.862438628,0.01906766,0.126486184,0.980122043,1.054029076,0.798133229,1.157375246,0.359363989,0.515760855,0.414358924,0.14583609,0.960634597,0.078754047,2.388917068,0.067190991,0.252267787,0.240474102,1.031024029,0.713467094,0.209366671,1.609209767,0.479089706,0.310885754,0.075232456,0.334916987,0.116169134,0.37179387,0.799644843,0.352354061,0.237938069,0.32412134,0.454236029,0.164331583,0.50164783,0.170631041,0.680335965,0.023909304,0.748154236,0.159221928,0.281084685,0.139151947,0.06201256,0.198118827,0.135486235,0.080259327,0.231897031,0.352691989,0.066607846,0.160097551,0.055337751,0.067785303,0.174960764,0.011517617,0.012544697,0.012384295,0.050940827,0.049514639,0.006536628,0.028182503,0.02933527,1.702612701,0.367019224,7.125360168,0.81106167,0.405038423,0.177395454,1.736820459,0.396690303,0.087073162,0.181941731,0.07260702,0.062602152,0.069320707,0.150549639,0.500049076,0.033209158,0.07719414,0.043202818,0.056828469,0.068631792,0.028331443,0.062258663,0.035975128,0.014765377,0.01032567,0.006855158,0.102281603,0.018638545,0.029633219,0.008816395
E07000027,2014,0.540476377,0.59430169,0.602384784,0.30893732,0.18619585,0.168031663,0.599852249,1.543542328,0.303407245,0.381793126,0.209346854,0.353462534,0.37708782,0.81656465,0.817270088,0.255160697,0.823591944,0.018082055,0.127660966,0.946429483,1.026458165,0.753444148,1.104201579,0.336243168,0.493942054,0.399554751,0.138062541,0.922116364,0.076297037,2.28165246,0.067145004,0.24453787,0.225939451,0.997801812,0.693016055,0.201852522,1.517533341,0.451477155,0.298144415,0.077007684,0.317673909,0.111026119,0.357992461,0.760928956,0.343669077,0.227014634,0.309118162,0.452080285,0.156660139,0.482406967,0.170869165,0.645056279,0.024364336,0.721115237,0.153615888,0.27538866,0.13020886,0.058204497,0.190629479,0.129091678,0.074472043,0.216690232,0.339371912,0.062455463,0.163834804,0.056393063,0.063827838,0.172824374,0.010563964,0.012136533,0.012008687,0.047262342,0.049546755,0.006004208,0.02854639,0.030812111,1.658281854,0.377547074,6.937838104,0.782102286,0.419828044,0.189614791,1.780944378,0.425592924,0.088238651,0.185697034,0.076742616,0.064571325,0.071773883,0.155870712,0.522842837,0.034343501,0.078777374,0.043627872,0.057896297,0.069267442,0.027251858,0.064691323,0.033481283,0.014322461,0.010708767,0.007176956,0.103331971,0.018142845,0.029606267,0.008992425
E07000028,2014,0.536967017,0.600100702,0.60211725,0.309868172,0.185282516,0.172121611,0.597919688,1.58229208,0.305477541,0.382149744,0.208881727,0.360762278,0.376508683,0.808625537,0.822165318,0.25480895,0.83308166,0.016809296,0.124231692,0.942999572,1.012069588,0.758263546,1.115651764,0.340741358,0.490211661,0.399800856,0.135069974,0.909000998,0.074431778,2.284520882,0.066386847,0.241526166,0.224456083,0.989945138,0.691222053,0.204580299,1.477894767,0.453407217,0.296739293,0.076732228,0.318747205,0.111579188,0.345984449,0.768674502,0.34143354,0.227823261,0.30591057,0.441457131,0.155897911,0.4777478,0.168173352,0.642229211,0.023138848,0.720560332,0.153863214,0.256073805,0.126935199,0.059284942,0.177330482,0.124875923,0.076473266,0.219741427,0.35127212,0.062126771,0.156300291,0.055005046,0.063820214,0.172045372,0.010579056,0.011409907,0.011502982,0.04846838,0.045968381,0.005717465,0.027390875,0.030906518,1.638858242,0.377521459,6.902256086,0.745319865,0.408416705,0.187948907,1.771375831,0.388423584,0.090671863,0.186238336,0.076253533,0.058595075,0.070987224,0.161269795,0.520558042,0.032472699,0.075174471,0.041156823,0.05472313,0.065289998,0.027439996,0.061166076,0.03443431,0.013128968,0.010137556,0.007608473,0.122599918,0.018866442,0.030299745,0.01110471
E07000029,2014,0.5832765,0.630124957,0.641246116,0.314689284,0.207928244,0.177850553,0.6465376,1.479301276,0.311373758,0.393314171,0.214438127,0.372824338,0.408931666,0.811886562,0.839483775,0.264768036,0.856652364,0.022045047,0.13125084,0.961934264,1.056320783,0.77494886,1.122008319,0.33824179,0.51230819,0.405656903,0.149420565,0.93602905,0.085388651,2.327336363,0.06501178,0.258972358,0.231058603,1.038552206,0.694320745,0.208356977,1.686424277,0.457342301,0.307814812,0.074595333,0.323646098,0.111664031,0.379895535,0.791312993,0.357087445,0.24490989,0.332813773,0.475333794,0.169545523,0.507608585,0.171594818,0.663689505,0.026034633,0.751378579,0.151970475,0.273860076,0.13437003,0.06259473,0.232558141,0.140269437,0.073515416,0.222465522,0.305355182,0.064554244,0.171435018,0.052241728,0.069679475,0.16548188,0.010345037,0.01593746,0.013808825,0.050297855,0.05052354,0.006830463,0.027101978,0.026634563,1.788261869,0.406517034,7.648733027,0.936504409,0.466147739,0.186780814,1.786409166,0.48353164,0.087437498,0.221937307,0.082151179,0.084330925,0.073898801,0.148955014,0.550423765,0.032332798,0.075160598,0.041213405,0.05481275,0.06590833,0.03542695,0.070248833,0.040346182,0.012426806,0.010068041,0.007944141,0.080945435,0.019099043,0.030680721,0.007880768
E07000030,2014,0.580636814,0.633163124,0.638599424,0.316583625,0.201096385,0.188262348,0.64274604,1.541730864,0.321129504,0.405260254,0.227450197,0.393423373,0.404651871,0.810086936,0.86815605,0.271313188,0.888646034,0.01788368,0.126746654,1.000259412,1.068101908,0.814287214,1.165845697,0.364653958,0.536372671,0.420314644,0.152911778,0.977033667,0.077943525,2.403521279,0.064266781,0.255578565,0.241215469,1.041793025,0.711362016,0.21603614,1.647600203,0.486439122,0.312529248,0.06280097,0.3377775,0.118434722,0.3803486,0.843262556,0.344445853,0.248769989,0.339069206,0.454784386,0.166510813,0.516790821,0.16593737,0.681423759,0.023856978,0.775498202,0.150612919,0.277855071,0.14179238,0.063519781,0.188889833,0.142770334,0.080717592,0.2376718,0.324106294,0.071129915,0.153760233,0.055071927,0.070115142,0.179218952,0.011850131,0.01219638,0.012525093,0.051486624,0.05070417,0.006525414,0.027355922,0.039748834,1.706274797,0.375783219,7.354402282,0.840378065,0.411749744,0.175192001,1.716379128,0.365227498,0.091497833,0.175574564,0.073274593,0.066649308,0.070020734,0.15842666,0.513859628,0.031339753,0.073436209,0.04005843,0.053848583,0.064122057,0.028240255,0.060588736,0.034881953,0.013821825,0.009597385,0.007667166,0.093552331,0.018883815,0.033388377,0.011415663
E07000031,2014,0.6028424,0.638827934,0.652098722,0.330179827,0.213761874,0.194698804,0.66676956,1.579111613,0.320168255,0.415109745,0.229776865,0.397892488,0.416292814,0.804437875,0.863630528,0.277467511,0.896318142,0.018895749,0.128175242,1.008899035,1.07684302,0.830108266,1.180727792,0.374910037,0.544440303,0.417532978,0.158229103,0.98289902,0.081046049,2.443129298,0.064486692,0.259802784,0.253636802,1.05665815,0.706276478,0.223687345,1.667349468,0.496493731,0.320330757,0.068708416,0.340706886,0.121177124,0.402150899,0.831531173,0.339800368,0.257843054,0.343853211,0.461095387,0.17248063,0.526572767,0.166786114,0.702013451,0.024900381,0.749434729,0.16020511,0.290944972,0.151197632,0.06676188,0.190855861,0.145295842,0.08734009,0.246454946,0.328280102,0.07282756,0.162924944,0.059909135,0.07428346,0.169319076,0.011941176,0.013146667,0.013778056,0.054842657,0.051883037,0.006808497,0.026531483,0.036053801,1.712293678,0.356172329,7.505444052,0.84923575,0.404817959,0.165826238,1.739570809,0.332809624,0.089009275,0.17952334,0.069752255,0.070509159,0.066571817,0.161349819,0.507471927,0.030236907,0.068740266,0.039181495,0.051879499,0.06212589,0.028291301,0.058427373,0.036424865,0.014380096,0.009302279,0.007888434,0.094988617,0.019205133,0.033591824,0.012377474
E07000032,2014,0.575276256,0.634506446,0.63192595,0.312869054,0.19760493,0.177500058,0.634605584,1.514128603,0.315810191,0.393177843,0.213055861,0.377568457,0.405476758,0.809216684,0.849317932,0.262228175,0.866142289,0.018669195,0.12792875,0.973654083,1.056613247,0.77436587,1.127997925,0.342729778,0.516193835,0.409606549,0.150678077,0.94481721,0.081066027,2.312704062,0.064824162,0.254396373,0.230200482,1.031782468,0.698825562,0.209984589,1.631578377,0.462275415,0.307757932,0.07013965,0.321304055,0.112827506,0.372677662,0.794542389,0.350423467,0.242049752,0.330407759,0.464658083,0.166077378,0.504483839,0.171413538,0.659431139,0.024642648,0.757927049,0.147622597,0.270592493,0.136972043,0.063804923,0.21636196,0.13868012,0.076029709,0.222783061,0.30993603,0.065213134,0.163140618,0.05387421,0.068123157,0.176272847,0.011309834,0.013776451,0.013218946,0.049788759,0.049954654,0.006486867,0.028138864,0.034738862,1.71373255,0.408784414,7.405910518,0.874576226,0.457049853,0.185492527,1.790494649,0.454365879,0.090236558,0.199363284,0.079138251,0.071479471,0.074897715,0.159164435,0.542204651,0.033761616,0.078344571,0.043967686,0.057959767,0.069714548,0.030052198,0.064623518,0.040279553,0.014230377,0.010458463,0.00812099,0.093119536,0.019771939,0.031699544,0.009792055
E07000033,2014,0.528539039,0.602268624,0.602538222,0.308950286,0.180082997,0.168848611,0.590956439,1.571772379,0.309623494,0.382777465,0.211858334,0.364270069,0.371199659,0.823932885,0.844295785,0.258993352,0.837340404,0.017382093,0.124834743,0.95284971,1.027367257,0.770743102,1.138033464,0.345084126,0.491780109,0.411122259,0.134748566,0.92392448,0.076242015,2.323318209,0.068783505,0.242097225,0.225066234,1.0033218,0.712861911,0.201179236,1.473612983,0.461085826,0.300253539,0.07198313,0.328567184,0.11268051,0.342224102,0.771814817,0.351158378,0.22276819,0.306010568,0.442814704,0.155308305,0.474171746,0.171851931,0.646843256,0.023822787,0.749941114,0.153360882,0.25874762,0.126927539,0.057753774,0.177548454,0.12679009,0.074556367,0.218295618,0.368474031,0.061847979,0.15378803,0.053701989,0.062043162,0.178511426,0.011111885,0.011163448,0.01130729,0.047982105,0.045809463,0.00565743,0.027210362,0.032449194,1.607653632,0.372256799,6.675908763,0.733336284,0.390834526,0.186185158,1.708561214,0.40668308,0.090332217,0.174246035,0.07366032,0.051789463,0.070070191,0.146502132,0.501005911,0.034580481,0.079632698,0.044316274,0.058869176,0.070055846,0.026388417,0.060769587,0.031938549,0.012765009,0.010754422,0.006844389,0.107758077,0.018731233,0.028551377,0.008802421
E07000034,2014,0.536984032,0.599824602,0.609846453,0.313236901,0.18400546,0.167971581,0.600448481,1.541825138,0.308050382,0.382363311,0.210426283,0.35573763,0.375865628,0.831779825,0.831129404,0.257425832,0.82805517,0.017752096,0.129631394,0.95686402,1.03172169,0.765364783,1.12887687,0.339422374,0.491518419,0.402809551,0.13456094,0.912600368,0.079013772,2.296074411,0.068014309,0.2472096,0.225823376,1.009879022,0.706395683,0.204369098,1.497173341,0.45224626,0.301618249,0.079992368,0.325945866,0.113368581,0.350689585,0.779393119,0.346713657,0.229139824,0.310766447,0.454042704,0.157432767,0.481510708,0.172990852,0.655780331,0.023466414,0.732965535,0.157192168,0.28157364,0.129654252,0.058798165,0.187127588,0.125592857,0.078796198,0.217865009,0.356130621,0.062838288,0.167347803,0.05618345,0.064752725,0.173322881,0.010957921,0.011415282,0.012522071,0.048122134,0.048459268,0.006051862,0.027917632,0.029120712,1.63718191,0.382526033,6.843270997,0.739199647,0.407871187,0.192529602,1.760942125,0.435889817,0.087855459,0.183686527,0.075837777,0.05835213,0.072392991,0.151925015,0.508433881,0.033285933,0.076257505,0.042454475,0.05626329,0.067153029,0.027949369,0.064030391,0.032394548,0.013183215,0.010442477,0.006710702,0.1269627,0.018170105,0.028292402,0.008391739
E07000035,2014,0.604726332,0.645432537,0.652115567,0.323872277,0.212409752,0.190699904,0.664818485,1.560201231,0.324655252,0.413029465,0.22881955,0.400857973,0.421232741,0.812984469,0.875868465,0.276831153,0.902622542,0.019333106,0.127604566,1.012319456,1.081760305,0.822457003,1.17562648,0.370628532,0.548067198,0.421395427,0.162017808,0.989716495,0.081746059,2.429583982,0.064217746,0.261860782,0.245121571,1.07124055,0.710156289,0.219531384,1.726197565,0.489956695,0.320357748,0.06567083,0.341988962,0.119190943,0.39798032,0.838993588,0.349475043,0.254928012,0.348764778,0.467514842,0.173037327,0.529887937,0.16762242,0.697395057,0.024508461,0.782483669,0.15483237,0.290110019,0.149463929,0.066503823,0.212634656,0.147440095,0.081185699,0.240608848,0.307405403,0.072005558,0.159537518,0.056709066,0.073533438,0.177404108,0.012317515,0.013992817,0.013424644,0.053552637,0.053217007,0.007120736,0.026567653,0.039484728,1.746294662,0.376059513,7.616591436,0.897839309,0.432722874,0.174124137,1.759392574,0.396144326,0.092096463,0.188648808,0.073611228,0.079468223,0.069930447,0.153523968,0.523414332,0.033567986,0.079408896,0.043709385,0.058175471,0.070362597,0.03023902,0.06179493,0.037065513,0.012880402,0.010223456,0.007935313,0.076351711,0.019499919,0.033874154,0.01091214
E07000036,2014,0.555147142,0.616151899,0.620419971,0.31139338,0.192416398,0.171293094,0.620140081,1.519214711,0.310384222,0.386605876,0.209753373,0.364325771,0.391211586,0.826252428,0.838000248,0.260268959,0.846025512,0.018980627,0.128585474,0.958202465,1.045032399,0.76220058,1.120989586,0.33594941,0.499278049,0.404863543,0.140377126,0.920697977,0.078617599,2.292871437,0.067636,0.25133968,0.222879265,1.015749374,0.705495428,0.205530949,1.567744887,0.453874797,0.302917681,0.080050064,0.321231882,0.110357662,0.353981748,0.780143442,0.357699958,0.233620368,0.318618568,0.465403204,0.161204433,0.489878897,0.174817821,0.652817923,0.024266372,0.737381599,0.152318682,0.269458322,0.129874908,0.061355466,0.20901794,0.130013222,0.073537183,0.217604196,0.328636369,0.062394202,0.16328666,0.053651612,0.065456613,0.174064748,0.010677965,0.013330388,0.013018352,0.049210515,0.047823418,0.005986633,0.028191972,0.030050605,1.694294456,0.403837524,7.207544924,0.832116383,0.448172973,0.194148836,1.816251421,0.470164149,0.089683425,0.206610258,0.081069452,0.069328208,0.074386729,0.155016943,0.541623918,0.034029239,0.078955776,0.043048482,0.057336857,0.068509987,0.030174958,0.067842679,0.039100727,0.01314384,0.010699076,0.007563124,0.101186949,0.019355616,0.029940504,0.008969851
E07000037,2014,0.556879282,0.613911746,0.621679968,0.311061366,0.189588025,0.175099004,0.624338364,1.598660526,0.314801937,0.38998406,0.214432581,0.36793574,0.389570217,0.837245124,0.845062948,0.262447735,0.849369371,0.018421189,0.127676776,0.965266891,1.056626735,0.780025298,1.138088784,0.348110502,0.501071332,0.407749958,0.14167922,0.93042347,0.080968292,2.319967738,0.068068941,0.250763857,0.232494933,1.026536032,0.710830946,0.209198662,1.531133921,0.464558619,0.30429227,0.078683002,0.32685633,0.115586506,0.363879372,0.772547579,0.348017289,0.235708289,0.318450571,0.460416429,0.161179396,0.490966555,0.173235714,0.655755639,0.024600833,0.742021733,0.164966549,0.276238083,0.131262985,0.061427337,0.191821496,0.127997958,0.073841432,0.223531298,0.350272427,0.06403366,0.168770179,0.057412857,0.065105095,0.169572559,0.010669789,0.013016148,0.013578842,0.049249366,0.046934859,0.006163682,0.027922048,0.028324335,1.663008147,0.369553663,6.99416076,0.774662079,0.418050202,0.18601034,1.783351995,0.407918951,0.091708734,0.187083339,0.076230173,0.066209615,0.073584021,0.154479711,0.524994705,0.034712774,0.080799422,0.044766412,0.059151583,0.071415718,0.027973644,0.063516288,0.035946221,0.014147486,0.010759548,0.007366839,0.099879672,0.019189897,0.030732635,0.009171589
E07000038,2014,0.589011568,0.632009953,0.641254659,0.323312392,0.20035543,0.183120806,0.641791652,1.578057979,0.318994978,0.403155512,0.222364034,0.389905984,0.405069644,0.826305475,0.869179725,0.27022285,0.88401923,0.019177508,0.127597879,0.996084298,1.068064353,0.801698449,1.163274344,0.360537442,0.528253874,0.420184029,0.153008936,0.976601842,0.079244211,2.394732331,0.066741957,0.257918736,0.2389497,1.045917163,0.714218317,0.21359673,1.66584598,0.483350126,0.314141065,0.071144997,0.335654123,0.116026569,0.379405944,0.826327368,0.35610255,0.244972075,0.33483504,0.462454095,0.167644183,0.514472848,0.170380891,0.686674129,0.024701396,0.768558449,0.151982336,0.280939245,0.142730193,0.063919496,0.208923133,0.140564765,0.080666313,0.234751654,0.325315958,0.068633681,0.157568163,0.054526739,0.070429865,0.179307764,0.011808465,0.012779837,0.012166477,0.05205994,0.051065848,0.006710928,0.028723804,0.035780917,1.741569671,0.392967937,7.456468559,0.866145843,0.435761437,0.18559695,1.787622229,0.419943275,0.089448388,0.192547933,0.076269802,0.068790317,0.072279272,0.158142532,0.52346697,0.032252008,0.075299,0.041718481,0.055556526,0.066739761,0.030198912,0.065148857,0.039070191,0.013974489,0.010012934,0.007609412,0.1028854,0.019494393,0.031822513,0.01012069
E07000039,2014,0.572223361,0.632425421,0.62603246,0.308323755,0.192505323,0.169680629,0.621542008,1.435623611,0.313969461,0.386320667,0.204971272,0.366647455,0.400124021,0.812145628,0.837471384,0.25972007,0.853661407,0.01896881,0.128144316,0.957898089,1.052169285,0.744797666,1.101878892,0.32667028,0.499275663,0.408011866,0.144216762,0.916611518,0.080498082,2.255512987,0.065713922,0.252680635,0.217127993,1.0220972,0.699982722,0.203555311,1.626263326,0.447812974,0.299652046,0.078109856,0.311794155,0.107583319,0.355061586,0.776689782,0.356782704,0.235108063,0.322723067,0.473755524,0.163312757,0.496725763,0.173438596,0.642888809,0.024680883,0.76367259,0.140642582,0.251755657,0.127214447,0.062714384,0.232969932,0.134686145,0.068117592,0.210472791,0.285515219,0.061684623,0.164590388,0.050104569,0.06522095,0.176091053,0.010691558,0.013058561,0.012459854,0.047634376,0.04868628,0.006197267,0.027899837,0.029638627,1.704861844,0.426850822,7.432230574,0.89205575,0.483887012,0.197043259,1.845756157,0.513209943,0.090340525,0.217103891,0.084689444,0.07411868,0.077617079,0.156293463,0.568366231,0.037951411,0.086737594,0.048609743,0.063968269,0.07715952,0.032130566,0.071193261,0.041148516,0.013200969,0.011739405,0.008274709,0.078441863,0.019871435,0.031894676,0.008877126
E07000040,2014,0.630813974,0.647000966,0.667861326,0.337163905,0.225804752,0.199390175,0.686724767,1.494578908,0.328836282,0.426584922,0.236615672,0.409820492,0.42898626,0.808314727,0.885721339,0.283694555,0.916845292,0.018463317,0.128273466,1.040047366,1.093772138,0.851498952,1.19702468,0.379586019,0.566916606,0.424088992,0.166311554,1.003471195,0.083169033,2.47627225,0.063399941,0.267834238,0.258096747,1.062463621,0.711405711,0.232245656,1.734304788,0.504273471,0.329924474,0.068097897,0.346364199,0.123506923,0.418659813,0.881352268,0.341734011,0.271799654,0.363571389,0.466394965,0.179445669,0.549026955,0.163519711,0.730478804,0.025997658,0.749682435,0.159141694,0.313046596,0.1581666,0.069136066,0.194530173,0.157145665,0.088897806,0.253091263,0.295739253,0.078963335,0.159948071,0.06053978,0.080728978,0.171386422,0.013183544,0.013697623,0.014703299,0.056454185,0.056571127,0.007460847,0.026581811,0.044829106,1.686632805,0.370023987,7.785297957,0.906795199,0.41121782,0.165197514,1.709906757,0.362480809,0.087272909,0.174638545,0.069679973,0.073537202,0.068089801,0.153315418,0.495372494,0.032446515,0.074932705,0.041895291,0.055285543,0.066626791,0.030262499,0.059169159,0.039407992,0.013675394,0.009923077,0.007514103,0.087759297,0.018883736,0.03473711,0.011285178
E07000041,2014,0.513183358,0.585703524,0.591394262,0.290569102,0.185268456,0.159292035,0.596804924,1.468750829,0.297829782,0.361041575,0.192717795,0.331332213,0.376605214,0.804751138,0.788509598,0.244268876,0.792701137,0.016035137,0.128891998,0.903538154,0.984505449,0.699186102,1.057629884,0.305240354,0.463534049,0.372838953,0.130943239,0.838621811,0.082067899,2.093278941,0.062784279,0.236902051,0.205358011,0.973197321,0.658195954,0.202489888,1.385911158,0.407333404,0.290803173,0.086288159,0.291521413,0.104167983,0.342420171,0.765799685,0.330612617,0.228560572,0.306890293,0.451141928,0.157398888,0.46429784,0.164843057,0.613241578,0.025044624,0.690452107,0.149397683,0.259361679,0.11941166,0.059892715,0.186605843,0.119715377,0.068322919,0.197938783,0.318368226,0.059985563,0.17696084,0.056832536,0.062919741,0.167376605,0.009495681,0.011770525,0.014583603,0.044836365,0.044821621,0.005461851,0.026675449,0.028699764,1.696102836,0.47326055,7.232949596,0.774952683,0.495001528,0.23244987,1.896100696,0.531124323,0.097700673,0.226640122,0.093227457,0.0678789,0.084798823,0.177106288,0.612189153,0.030519446,0.069821956,0.038280417,0.050285796,0.0602684,0.034207995,0.072714113,0.033397061,0.012784545,0.00975663,0.008652617,0.087326967,0.020031407,0.028921206,0.010313504
E07000042,2014,0.588729891,0.637892689,0.637156122,0.327383016,0.205705915,0.18772062,0.648935439,1.558231743,0.322392835,0.407830161,0.219557777,0.385286417,0.411787635,0.804209978,0.847874823,0.272359948,0.892417749,0.01693075,0.126510243,0.990365909,1.066355676,0.794561232,1.14982924,0.357041981,0.529778725,0.41303435,0.15236382,0.942878743,0.079528494,2.350218594,0.064531292,0.256721586,0.233426523,1.033423724,0.701463071,0.219516788,1.605515356,0.472720504,0.310300959,0.081075665,0.325678667,0.116424989,0.375447469,0.833289922,0.34198263,0.251728389,0.336857957,0.464366908,0.168549781,0.515670844,0.169802843,0.671036354,0.024671236,0.754969749,0.155587749,0.267922185,0.141034806,0.065964947,0.194104278,0.139486156,0.078422814,0.232153596,0.304271293,0.068658447,0.159748553,0.057806202,0.071398665,0.173619959,0.011783651,0.011858008,0.01313205,0.052358732,0.050095968,0.006348483,0.027142625,0.039125886,1.682207213,0.381007823,7.462636837,0.846199648,0.440141711,0.180757298,1.838033924,0.360983132,0.096950114,0.187334652,0.075142331,0.071040567,0.071295283,0.167524848,0.536085899,0.037288122,0.086533173,0.048147221,0.062646072,0.075891817,0.027789944,0.060049248,0.035823898,0.011533641,0.011434937,0.009007017,0.080243678,0.020149795,0.035749063,0.013323202
E07000043,2014,0.583655689,0.632364808,0.635243007,0.330621506,0.200421154,0.188061109,0.641261827,1.621035467,0.325198471,0.41255388,0.229285655,0.389792618,0.400263706,0.829138771,0.874833685,0.273089226,0.887875814,0.017861191,0.126251262,1.003763184,1.075991818,0.822913324,1.186158373,0.37328486,0.533223874,0.421554815,0.148404196,0.979311509,0.077684864,2.436224312,0.067928497,0.253941583,0.244366823,1.049246125,0.72382285,0.217681389,1.592821139,0.491189044,0.316419314,0.074015784,0.342719987,0.121301472,0.379700947,0.824930789,0.347901397,0.245798017,0.330931708,0.456067514,0.166230859,0.512232475,0.170747952,0.694586099,0.024181256,0.758384788,0.160780498,0.277616978,0.144128864,0.062546214,0.175952469,0.138571754,0.083896141,0.239688672,0.352687776,0.069950732,0.157626829,0.057544581,0.069840111,0.17676492,0.012157327,0.01167461,0.012342061,0.052793367,0.049696749,0.006329898,0.02754045,0.034547777,1.645629165,0.361158776,7.137437137,0.781406223,0.388694528,0.176852582,1.731343214,0.333785242,0.092375455,0.171344254,0.07216971,0.060195177,0.068203922,0.157368764,0.501082098,0.034842781,0.08023586,0.0446658,0.058718672,0.070896859,0.026862884,0.057074713,0.032990498,0.013535969,0.01079245,0.007854524,0.097037937,0.018965515,0.032032819,0.010577839
E07000044,2014,0.630258435,0.667082694,0.674244798,0.337290913,0.21848161,0.198147274,0.684217989,1.582989317,0.33301138,0.42830909,0.236687242,0.414211374,0.431672072,0.822160925,0.903247932,0.282251221,0.927329798,0.019855322,0.130959611,1.043059583,1.11233982,0.853076568,1.213288886,0.384729184,0.566446313,0.432731464,0.166088981,1.017062066,0.084208276,2.510082296,0.064280979,0.268138989,0.258321152,1.095519987,0.726861648,0.226247045,1.745486882,0.509196794,0.32864467,0.063005415,0.349510302,0.124430698,0.411907095,0.860157383,0.349933312,0.264318552,0.358035996,0.476693495,0.178830486,0.547017881,0.170457328,0.728566977,0.025107339,0.787193638,0.15806236,0.298439849,0.155369766,0.067990903,0.211555413,0.153506725,0.088102475,0.251959782,0.310927744,0.076090173,0.167475912,0.057792323,0.076312978,0.173754639,0.012824778,0.013635229,0.01315044,0.055713935,0.055710893,0.007517385,0.02780734,0.034311125,1.711422696,0.379596212,7.700772302,0.894939002,0.421659323,0.167426971,1.711782754,0.367786527,0.088769077,0.183499455,0.071600558,0.073065077,0.06843558,0.153122423,0.509013372,0.034274473,0.078777823,0.044698122,0.058627857,0.071194346,0.029329269,0.060113362,0.036069013,0.014589771,0.010376332,0.007732808,0.095718645,0.018772665,0.034021725,0.009823168
E07000045,2014,0.602995983,0.651522639,0.662316046,0.330698102,0.204366037,0.19056054,0.656836334,1.568596293,0.332077872,0.417792649,0.233624454,0.402929963,0.413107583,0.830486144,0.897723547,0.276413816,0.906723343,0.018150602,0.129976959,1.033485296,1.093035146,0.838035131,1.2005397,0.376985549,0.550713431,0.429966284,0.156531698,1.006034325,0.081735477,2.477440031,0.066122422,0.261758926,0.250959757,1.077344057,0.733418715,0.221697168,1.680925828,0.499773199,0.324125686,0.067585874,0.349248285,0.122830033,0.394203611,0.854628962,0.350921248,0.255088877,0.349293268,0.465496217,0.172537839,0.532935104,0.168925072,0.717164358,0.024884022,0.776230512,0.156985159,0.293025267,0.148076334,0.065435097,0.199136379,0.149235013,0.084277655,0.243618063,0.324819266,0.07421481,0.161190827,0.055908757,0.073622679,0.180457466,0.013148705,0.012778217,0.012828032,0.053682953,0.054357723,0.006916349,0.027907681,0.037871675,1.668280753,0.380638824,7.366870438,0.837291013,0.407363772,0.17557048,1.699294913,0.399330769,0.090284911,0.175739559,0.072294653,0.063759997,0.070474237,0.147946319,0.499020554,0.033713964,0.077789843,0.043471147,0.057131148,0.069020856,0.029270568,0.05977769,0.035732548,0.014042208,0.010523161,0.007230864,0.09299094,0.018597259,0.03243935,0.00994695
E07000046,2014,0.593187487,0.635141367,0.650656645,0.332866775,0.202752809,0.193026431,0.654246048,1.655098262,0.328280698,0.413953621,0.23392639,0.401844124,0.405726846,0.831000413,0.883818566,0.276524506,0.894546681,0.018168263,0.128406758,1.017125181,1.084165164,0.83996553,1.199241548,0.38264737,0.542404177,0.423625757,0.154417852,0.99724469,0.08145889,2.464626501,0.067307843,0.258708405,0.257072318,1.068185134,0.727050541,0.221291872,1.633400749,0.501119966,0.322114478,0.070202391,0.351003468,0.125328823,0.398481546,0.857385049,0.342143298,0.252762881,0.340755316,0.455706769,0.17021644,0.519116832,0.167666018,0.709807657,0.02493725,0.765178404,0.164118483,0.294406433,0.147487155,0.065053251,0.176719521,0.143462212,0.08929174,0.249139581,0.366288146,0.07288534,0.164209635,0.060094821,0.072171281,0.174549498,0.012645379,0.012423171,0.0134202,0.053773424,0.051401624,0.006847429,0.027193127,0.035193357,1.677177414,0.344206464,7.205668989,0.795900381,0.379029411,0.168838546,1.702884144,0.32050701,0.089931013,0.164473506,0.068853681,0.060856949,0.066998308,0.155409641,0.48736804,0.033299377,0.075777492,0.043365437,0.056995419,0.067993329,0.027535828,0.055268052,0.033190373,0.014323826,0.010325276,0.007367079,0.10475293,0.018338702,0.03240302,0.01046226
E07000047,2014,0.620022708,0.654697197,0.666300373,0.336487822,0.21415045,0.199027132,0.681187084,1.570723863,0.331843426,0.420503377,0.235262833,0.408546525,0.422449294,0.826267759,0.887867242,0.280027686,0.915910778,0.019719967,0.129808011,1.031740576,1.102429073,0.850565976,1.210322876,0.385107568,0.558517232,0.42732897,0.161320086,1.011917573,0.083295689,2.486779499,0.065764905,0.263942597,0.260736225,1.090902014,0.72652207,0.225129435,1.686068315,0.50664601,0.328437316,0.070411596,0.350409732,0.124648416,0.412058245,0.849476637,0.348613583,0.261349311,0.353437168,0.476559611,0.176586849,0.536236074,0.17035778,0.718052066,0.02493344,0.770485736,0.162455689,0.300527339,0.152013607,0.068188749,0.200633818,0.150255196,0.086939057,0.25055121,0.333940691,0.073807375,0.169039114,0.060454635,0.07464505,0.175114514,0.012220846,0.013461389,0.01397217,0.055688024,0.053221745,0.007408122,0.025762456,0.033773917,1.694563731,0.369746172,7.479232063,0.85333446,0.401615386,0.166875383,1.718085478,0.352452212,0.091438901,0.177848862,0.070533144,0.071822525,0.067455041,0.154717677,0.506381564,0.033448036,0.076283049,0.043797273,0.057176567,0.069407182,0.029807901,0.058674356,0.038344473,0.014514374,0.010363994,0.007705518,0.099407845,0.018565039,0.032284741,0.009716973
E07000048,2014,0.632027157,0.633900327,0.661162582,0.343057773,0.224473843,0.196166684,0.677554503,1.454686816,0.327425486,0.426857918,0.237759176,0.403577054,0.416473923,0.796286386,0.884351148,0.280439171,0.90156784,0.019868647,0.128757918,1.037614292,1.088185826,0.856826947,1.198705486,0.379677082,0.562744018,0.422440461,0.156930171,0.994483842,0.082283995,2.497034012,0.063558171,0.266756956,0.261171838,1.055055963,0.712377467,0.230399482,1.709918387,0.505876192,0.329560026,0.069452898,0.352299481,0.124093671,0.416697102,0.849658337,0.339162817,0.267854223,0.354057982,0.463681608,0.176032182,0.542709583,0.164308616,0.74322584,0.02534228,0.723704638,0.162437461,0.312679572,0.157306998,0.065235513,0.191683444,0.15589712,0.094039728,0.254670647,0.300310122,0.079219084,0.158891424,0.05833315,0.080951625,0.159579073,0.01327027,0.014190359,0.013946659,0.058012845,0.056184597,0.007260802,0.026990723,0.035394448,1.642172181,0.364351697,7.584164515,0.853583393,0.392107521,0.16206373,1.647109446,0.365655952,0.083232616,0.17644309,0.069399267,0.069086107,0.065899516,0.145635825,0.475421767,0.033109583,0.076745627,0.042542786,0.056320572,0.068723678,0.031419498,0.058814225,0.038377231,0.013533222,0.009978003,0.006909715,0.087902958,0.018927516,0.032401273,0.009079728
E07000049,2014,0.63685159,0.662549605,0.678315727,0.333903319,0.224471628,0.198056555,0.692128207,1.448345526,0.334979666,0.429932884,0.239007678,0.406124285,0.431538229,0.816425768,0.898659931,0.28386836,0.919511884,0.018851667,0.130402177,1.049845607,1.101829852,0.85374897,1.204416228,0.378590972,0.572707966,0.42705011,0.166692047,1.008291205,0.087299244,2.478937742,0.063307391,0.268824879,0.254195197,1.084459482,0.72224401,0.230169818,1.784790054,0.503962306,0.329141915,0.066993043,0.351388349,0.124257463,0.417824658,0.913817189,0.34563107,0.27100231,0.370802371,0.47533629,0.180398273,0.553614614,0.163477451,0.741374481,0.026114344,0.774583957,0.154070709,0.318299798,0.157538789,0.068868784,0.213339441,0.160161322,0.087855182,0.251470018,0.280825711,0.081072129,0.165474039,0.058374398,0.080375284,0.171786552,0.013849512,0.013695514,0.014646438,0.055933633,0.058964851,0.007781695,0.027987687,0.044030184,1.698436768,0.37490254,7.877055956,0.942945687,0.419516699,0.166338128,1.678183307,0.399495156,0.086336222,0.175455427,0.071115319,0.078953092,0.069303429,0.147673955,0.498226693,0.032071758,0.074840854,0.042257616,0.055503695,0.066922131,0.032903927,0.060273819,0.040456212,0.013251701,0.009993669,0.007511634,0.070581403,0.018451374,0.032392071,0.008819003
E07000050,2014,0.598635172,0.638576493,0.648078832,0.328083263,0.206579966,0.190279839,0.656189176,1.541761627,0.325639564,0.413799983,0.226214647,0.391542699,0.41301355,0.817103055,0.869051682,0.271819703,0.895819347,0.017436625,0.127807458,1.010403111,1.076986139,0.816979521,1.172776467,0.365481431,0.541746999,0.423249852,0.154615083,0.977734448,0.081500574,2.405620673,0.06494311,0.25917623,0.244153118,1.051412274,0.710395568,0.222488886,1.661932536,0.485115876,0.317643293,0.075203269,0.341186069,0.12046203,0.391114785,0.846417577,0.344933443,0.254766516,0.343183539,0.465474896,0.170861615,0.526192947,0.167975049,0.692343399,0.024984487,0.764676587,0.15716714,0.290777651,0.146817731,0.065884866,0.192918436,0.145220871,0.0846328,0.240859089,0.316055316,0.072391747,0.161146329,0.057502728,0.072971536,0.174913967,0.012064975,0.012412814,0.013239278,0.053148585,0.052639131,0.007047823,0.028024076,0.039952222,1.707566079,0.380883716,7.498788952,0.854420895,0.426340517,0.178763383,1.781372982,0.385216571,0.092415311,0.18293423,0.075413661,0.069015512,0.072194954,0.162139286,0.520741227,0.035781373,0.083057789,0.046469394,0.061438597,0.075194969,0.030125165,0.060518399,0.03940265,0.014402668,0.010887341,0.008249633,0.087042482,0.019260007,0.034351016,0.010541875
E07000051,2014,0.593488429,0.636448175,0.650325272,0.326848726,0.207041732,0.190826101,0.656511937,1.550268746,0.327013899,0.415465977,0.233089751,0.388069109,0.406859982,0.831051117,0.880870732,0.27166358,0.888338801,0.017701178,0.130961173,1.028459318,1.077931328,0.83145831,1.194636963,0.371687509,0.545878534,0.422848013,0.152239541,0.983496988,0.082078052,2.446493532,0.066350969,0.258967153,0.24742903,1.062883172,0.726222572,0.223420679,1.631569088,0.489014291,0.319413547,0.077616374,0.346333522,0.123850959,0.392828395,0.871702247,0.344848267,0.253668097,0.344524123,0.462904727,0.172139725,0.527209559,0.166219593,0.716952018,0.024957901,0.757406734,0.158835337,0.29880712,0.146214122,0.063800977,0.18478743,0.145848187,0.084111072,0.240971932,0.331840436,0.074320941,0.166215574,0.058662145,0.073830263,0.176644865,0.012724242,0.012477493,0.013934598,0.053635165,0.053878581,0.007126845,0.029868807,0.034910065,1.66938257,0.360794826,7.316984433,0.818069372,0.396060087,0.174588677,1.721145819,0.376504311,0.088217826,0.170191951,0.07335745,0.062616932,0.070130988,0.156335721,0.493485209,0.03323292,0.076972042,0.043657267,0.057149053,0.069487723,0.029845293,0.060169925,0.033388498,0.014049179,0.009966888,0.007684619,0.106229138,0.017922188,0.031882458,0.009723269
E07000052,2014,0.638432371,0.65775088,0.674170298,0.346048852,0.225272676,0.201967881,0.688492904,1.585732037,0.334547193,0.432306894,0.240109904,0.414533682,0.429359629,0.823392268,0.89316325,0.286602416,0.928188098,0.019712886,0.130163147,1.05013281,1.110842342,0.863090217,1.21893541,0.389028658,0.568256354,0.432983162,0.163657509,1.023491329,0.083537347,2.532645915,0.065087592,0.267222241,0.266250807,1.087050767,0.727234587,0.230131494,1.744825099,0.517351842,0.330834716,0.072375168,0.354836492,0.125846581,0.415359897,0.876011216,0.34578242,0.269434045,0.357519948,0.473580274,0.179319415,0.550216112,0.166193987,0.738193794,0.025543003,0.762497539,0.163221682,0.306287967,0.158071514,0.069016213,0.201424371,0.154350168,0.09231143,0.258161159,0.318909666,0.077924965,0.164470117,0.060069031,0.079009158,0.171781718,0.0130145,0.013889996,0.013753289,0.05834271,0.055238028,0.007600311,0.026976975,0.036732268,1.734477493,0.354352139,7.764176406,0.884630263,0.410594042,0.166105679,1.735425654,0.349281029,0.088679229,0.183248316,0.070520533,0.074689929,0.067221748,0.161684348,0.503248083,0.033278764,0.076725804,0.043978413,0.057421555,0.06972824,0.03043091,0.059359669,0.038416409,0.013781834,0.010046065,0.007771514,0.10608187,0.019039145,0.034468205,0.011460733
E07000053,2014,0.579783629,0.627148793,0.641258894,0.325597087,0.198375194,0.183904605,0.638717503,1.632041182,0.322066671,0.402116512,0.22278904,0.387067905,0.396197334,0.838718522,0.861134877,0.27019042,0.871232474,0.018617364,0.129855054,0.992646033,1.062918653,0.80905623,1.170200773,0.365811351,0.525891591,0.415404429,0.148819619,0.972774221,0.081348435,2.400069334,0.066695816,0.253579625,0.247572417,1.054157905,0.717618722,0.215097409,1.596334962,0.48225381,0.316099091,0.080145656,0.340840787,0.11909432,0.382910958,0.824987051,0.348370953,0.243907685,0.328943769,0.457272291,0.168158656,0.507364222,0.168282281,0.690526607,0.024467421,0.750151261,0.162897646,0.291654903,0.141123825,0.064716449,0.194617835,0.136785908,0.081955621,0.236658034,0.358068185,0.068076015,0.167493792,0.057648678,0.070211667,0.174017203,0.011708932,0.012531376,0.013081447,0.052834842,0.049796318,0.006881047,0.02757418,0.031111792,1.700606015,0.36968901,7.207601678,0.80268934,0.409216205,0.185447527,1.767016777,0.38896833,0.088907725,0.184602859,0.073919466,0.063350003,0.071408624,0.156898872,0.510653304,0.034533438,0.079827985,0.044833429,0.058952208,0.070878272,0.030111772,0.062537732,0.035058646,0.014372056,0.010744079,0.007418959,0.109170518,0.01880037,0.030744428,0.009995355
E07000061,2014,0.55608723,0.598128744,0.61248616,0.318735847,0.200750064,0.173807031,0.623313617,1.513708504,0.307060746,0.390549362,0.21241271,0.358902937,0.389145351,0.797845298,0.813960281,0.25979797,0.833187502,0.01773218,0.127867953,0.950611522,1.027121887,0.762740747,1.104014126,0.338718592,0.50400528,0.390810265,0.142125866,0.919159601,0.078853837,2.267673883,0.064856725,0.248768799,0.229998894,1.000114833,0.671760073,0.214371539,1.503458159,0.452535536,0.306685717,0.081266637,0.315101316,0.114371771,0.373678372,0.777945705,0.329493693,0.243684367,0.321162722,0.454444833,0.161662696,0.49424041,0.168916823,0.663538471,0.0257934,0.68653112,0.158756165,0.290759796,0.135773153,0.060116082,0.177461254,0.134203293,0.080643349,0.22195586,0.317547367,0.066729287,0.170449798,0.061370845,0.070293353,0.165358182,0.01095177,0.012505832,0.013227229,0.049926852,0.051589468,0.005904609,0.025956742,0.033614467,1.644973969,0.399062009,7.15344369,0.781223722,0.429297599,0.19143425,1.785568047,0.421744725,0.086734415,0.196303795,0.077834428,0.065849514,0.072957088,0.157387912,0.53212333,0.034307967,0.079153212,0.044272501,0.0581423,0.069601064,0.028024578,0.06403836,0.034383217,0.013402185,0.010608824,0.007577769,0.09729575,0.018099272,0.03104721,0.01109729
E07000062,2014,0.529362182,0.596579933,0.602233253,0.309331201,0.180127758,0.16890087,0.592603999,1.603347994,0.307910963,0.379931904,0.204017597,0.358797381,0.374985568,0.813908848,0.820840089,0.252121817,0.824760789,0.017074997,0.126536833,0.931637142,1.017894228,0.742854261,1.109722867,0.336193181,0.486253654,0.394890936,0.13482176,0.908092905,0.074897636,2.257566675,0.068480345,0.238744632,0.222624793,0.997743347,0.691018808,0.202171865,1.454534776,0.446404369,0.298471992,0.083464801,0.312802319,0.11075769,0.34830814,0.747062607,0.341293387,0.223598855,0.302760693,0.4460638,0.155329239,0.472699882,0.170269155,0.633494124,0.023635865,0.724758358,0.156891666,0.252954595,0.126208681,0.059859542,0.184662395,0.124165668,0.070354026,0.215291966,0.355934533,0.060394189,0.163807248,0.054240102,0.062253967,0.174164267,0.010300551,0.011453614,0.012227159,0.047051819,0.045755611,0.005831519,0.026993877,0.03055056,1.614614433,0.39079948,6.838600017,0.740521939,0.424646373,0.194764394,1.794937564,0.414407232,0.092506925,0.189637717,0.077562218,0.056871489,0.072851465,0.159005232,0.53357309,0.037035122,0.086087484,0.04753238,0.062986505,0.075717737,0.027514227,0.064501026,0.032244107,0.013463581,0.011459316,0.007647454,0.108591891,0.018604079,0.030821831,0.011158026
E07000063,2014,0.58769852,0.624496671,0.642404051,0.318307053,0.21165769,0.186323257,0.661095388,1.456184372,0.319842474,0.405787025,0.221745891,0.375209088,0.408912451,0.801557332,0.847100665,0.269880558,0.866287868,0.018613751,0.12993269,0.988415626,1.068909402,0.80168625,1.143321271,0.352276126,0.529193313,0.400097825,0.15189377,0.932020397,0.087645217,2.333893205,0.064083754,0.259135936,0.240187287,1.045748404,0.695184263,0.221538597,1.589564965,0.466431737,0.314930724,0.079559985,0.324160829,0.11787418,0.394598548,0.797188506,0.334598423,0.25671044,0.341099357,0.467773091,0.172345177,0.516438331,0.16716448,0.685386465,0.025966149,0.720929782,0.162958585,0.297287671,0.142227471,0.065885324,0.199592541,0.141486337,0.08133781,0.232945245,0.304068755,0.071868071,0.174871486,0.060641829,0.074077462,0.160396856,0.011252549,0.014003477,0.01579461,0.052244966,0.051758617,0.006642315,0.026000399,0.032105727,1.616937611,0.365969898,7.325384586,0.823654354,0.412520679,0.171260709,1.72801113,0.385448419,0.088161991,0.184348098,0.072467723,0.071662218,0.070073406,0.146404072,0.511029878,0.035601288,0.082304606,0.045909174,0.060437144,0.07327539,0.030294585,0.062764231,0.035037825,0.011468536,0.010999565,0.007690448,0.080619443,0.018251144,0.031931584,0.009792123
E07000064,2014,0.61831421,0.633817242,0.65782754,0.341418375,0.218364982,0.200061546,0.672645132,1.621181884,0.327888919,0.428320308,0.240653217,0.412804508,0.413150026,0.809125701,0.887072293,0.28084521,0.905553931,0.019507397,0.126049978,1.03461578,1.08848917,0.866820973,1.215239307,0.396473429,0.562116141,0.422773686,0.159747969,1.023775648,0.080641713,2.531120225,0.064821288,0.261757149,0.26931189,1.068231329,0.714572992,0.227963069,1.658025821,0.514791337,0.33222938,0.066744815,0.359759461,0.12725859,0.419304438,0.847428255,0.334001097,0.262567812,0.347443825,0.454272215,0.175761927,0.535170684,0.163106124,0.733592153,0.024944953,0.733457956,0.170373372,0.309086327,0.159531731,0.067263064,0.173556864,0.15064907,0.091867695,0.261477212,0.34404755,0.077725476,0.159061717,0.06120803,0.077673495,0.166300972,0.012871467,0.013213845,0.013371416,0.058097552,0.053226294,0.007617441,0.025618811,0.03624953,1.636654837,0.329114942,7.296662221,0.803608343,0.358473308,0.154966167,1.627762356,0.286047903,0.085629134,0.158240639,0.064209489,0.062858569,0.062048663,0.144064103,0.463393557,0.031443544,0.072946433,0.040877602,0.053808837,0.065207859,0.02742707,0.053041185,0.033764756,0.013948701,0.009714266,0.006948873,0.103297871,0.018058314,0.032782963,0.010008786
E07000065,2014,0.618567435,0.650563267,0.661533192,0.325750561,0.2209848,0.192398301,0.682442635,1.440711892,0.328240088,0.417927235,0.228928929,0.393557741,0.429432283,0.805607638,0.871073716,0.280695741,0.903678124,0.019659077,0.130477042,1.016633241,1.096767289,0.81816612,1.164009759,0.360791214,0.54992265,0.419843922,0.161539161,0.970249305,0.085449673,2.399255542,0.064695748,0.267293235,0.242040668,1.068612609,0.709485435,0.224102713,1.707976108,0.482299322,0.31862091,0.072733997,0.3347272,0.119571556,0.403989081,0.835649668,0.346979499,0.263913842,0.35654473,0.485659746,0.175844276,0.537350134,0.168175908,0.701197104,0.025778322,0.75662636,0.156415128,0.29139006,0.147831455,0.067593627,0.21872865,0.149422101,0.080239722,0.239821028,0.277568926,0.07378724,0.169362228,0.057171221,0.076385584,0.165480082,0.011617092,0.014967825,0.014872102,0.054152572,0.053395118,0.007312916,0.026302162,0.03548486,1.678588533,0.381731516,7.690361124,0.912064455,0.440485205,0.17396336,1.741129698,0.405952828,0.090387984,0.194139118,0.075900919,0.082873005,0.070610181,0.147730135,0.525118457,0.035703561,0.082754027,0.046395106,0.061239375,0.073788106,0.032509308,0.063898656,0.040143574,0.011551471,0.011002988,0.008300309,0.072454743,0.018859103,0.034837102,0.00944356
E07000066,2014,0.535412757,0.593501196,0.595993896,0.305187186,0.187852309,0.163814723,0.606251336,1.448022592,0.302227829,0.379123694,0.202319868,0.338268181,0.379312426,0.815339698,0.802404323,0.251279388,0.814961124,0.018557148,0.128670114,0.921914628,1.023581377,0.72449314,1.073848744,0.318738067,0.476643105,0.392253328,0.134807399,0.877210306,0.080505558,2.185197311,0.067488269,0.244428253,0.21014413,0.989377304,0.683680365,0.201646299,1.461100047,0.427227756,0.292144119,0.094330317,0.308870046,0.10818041,0.345751725,0.729806939,0.346348614,0.228138328,0.307222654,0.463233417,0.157007952,0.473744206,0.175140817,0.625923917,0.024578316,0.699005282,0.157042811,0.265197491,0.123527366,0.058133407,0.191759986,0.12224235,0.068940412,0.205197765,0.314447254,0.05962167,0.170631516,0.05555108,0.063593012,0.165570118,0.009797553,0.013406268,0.013403265,0.046418191,0.046390582,0.005512048,0.026762867,0.025948562,1.599969523,0.395752316,6.888216688,0.777776403,0.438054694,0.193700361,1.795481384,0.471475752,0.089948613,0.205517471,0.080819806,0.072990515,0.073533157,0.146490986,0.536973181,0.038394983,0.088716866,0.048868608,0.064420572,0.077409424,0.030030679,0.065235762,0.034382054,0.01180314,0.012016563,0.007664425,0.085904776,0.018927667,0.028987134,0.008661496
E07000067,2014,0.56391145,0.61687984,0.618313824,0.315825874,0.194102016,0.17303553,0.628575353,1.49972758,0.310726146,0.389171173,0.208245932,0.362371459,0.394622928,0.816551664,0.83212563,0.260113262,0.847090394,0.019361622,0.126516793,0.950700943,1.053029467,0.758334901,1.111467419,0.337650454,0.494144593,0.403154529,0.143027578,0.915994244,0.081243427,2.270203917,0.067309334,0.25287738,0.223916284,1.020409494,0.693347317,0.207448796,1.538654658,0.450274064,0.302078346,0.082843253,0.316566319,0.111252066,0.362963397,0.74741566,0.352495957,0.237456898,0.317931299,0.469679865,0.163008754,0.488464284,0.175304509,0.648471947,0.024590987,0.728894502,0.158526294,0.263543906,0.131995994,0.062496239,0.207203911,0.12851712,0.072206868,0.217300939,0.31230271,0.061848819,0.167470593,0.055171896,0.066288886,0.166618197,0.010014568,0.01363134,0.013462715,0.04943767,0.046219608,0.006220097,0.026416359,0.026830303,1.655639971,0.39176946,7.161296429,0.82252275,0.444699618,0.188698369,1.813177634,0.433123096,0.090225044,0.2052262,0.080142423,0.070691802,0.073026545,0.152288125,0.541054797,0.037481236,0.086231088,0.047680252,0.063053026,0.075712912,0.03011508,0.065977487,0.036272572,0.012991359,0.011658493,0.008045568,0.081339901,0.019114072,0.031731381,0.008741329
E07000068,2014,0.597614922,0.634139898,0.645906441,0.308260574,0.224134839,0.175358206,0.681180333,1.316956986,0.308711923,0.397034002,0.20656295,0.359438539,0.427033637,0.803530703,0.821666444,0.265626362,0.849696285,0.023776577,0.138677662,0.954582708,1.072665195,0.754159345,1.089916961,0.319449444,0.507584785,0.394019475,0.157323595,0.896341159,0.09772068,2.219556379,0.065293133,0.261380529,0.219874025,1.051774771,0.68117937,0.214014296,1.668328639,0.436450923,0.307317207,0.087351545,0.319009219,0.110305977,0.400379405,0.758045555,0.347768964,0.256491502,0.349169176,0.501246674,0.176543626,0.516446421,0.175011063,0.664761607,0.02592213,0.707504411,0.159785444,0.294694254,0.138173897,0.066229835,0.237138,0.137948592,0.076207274,0.215623633,0.258960103,0.067069666,0.18895516,0.05692738,0.073109713,0.154467565,0.010014025,0.017852199,0.018917194,0.050763666,0.05058147,0.006256156,0.025897005,0.02524119,1.690507771,0.440177388,7.925060405,0.950801187,0.49802893,0.187854633,1.792083979,0.55399885,0.088430861,0.253535108,0.085816484,0.119514852,0.073736119,0.142982046,0.574719085,0.036084919,0.083623185,0.046754244,0.061877808,0.074358394,0.035332052,0.071908477,0.039136319,0.011006979,0.011246417,0.007780424,0.066111304,0.020154782,0.029841105,0.007545299
E07000069,2014,0.581637866,0.619185026,0.634540441,0.319065797,0.203989804,0.18320777,0.645235279,1.529709635,0.315988613,0.40046912,0.222025513,0.377880138,0.402274205,0.81371702,0.850065123,0.267666197,0.864032482,0.019346341,0.126993794,0.979915166,1.061211405,0.798816816,1.141722221,0.355548125,0.522079136,0.408029719,0.150167972,0.949052905,0.083329177,2.346154366,0.064846346,0.256109024,0.240365486,1.039955086,0.701175793,0.214159952,1.605160181,0.472295727,0.312083874,0.074116047,0.33158675,0.117048526,0.383269175,0.804872223,0.34217757,0.248251276,0.333841197,0.459440654,0.168027314,0.50625948,0.167105278,0.678649083,0.025483983,0.738229084,0.157388252,0.289488726,0.142749362,0.06425844,0.197787372,0.139931443,0.081576306,0.231566898,0.325728648,0.069054395,0.163933998,0.057352688,0.070870847,0.167204938,0.01125882,0.013402947,0.014127312,0.052283751,0.050518524,0.006877114,0.026872965,0.030442124,1.676730675,0.367161249,7.234092565,0.82932164,0.415823489,0.179033978,1.730656849,0.390297958,0.087894389,0.184725326,0.074035139,0.070164255,0.0706817,0.149747586,0.513600178,0.033908398,0.07793234,0.04389261,0.057818562,0.069744412,0.030683921,0.06232259,0.035983135,0.012738755,0.010411664,0.007404923,0.087117935,0.018865028,0.031222728,0.008590761
E07000070,2014,0.558998944,0.618210969,0.6221372,0.298470661,0.199202543,0.166981682,0.633984719,1.335858207,0.305802488,0.381145778,0.204281025,0.3497647,0.404021814,0.794344042,0.813469982,0.254348794,0.830290778,0.019430949,0.131181731,0.936255588,1.042236867,0.732598506,1.068863354,0.314537844,0.493992409,0.392853103,0.146577531,0.903960591,0.087183742,2.161909111,0.064326184,0.253048763,0.212548526,1.013494936,0.671109261,0.206836094,1.557781049,0.427911377,0.298341074,0.077458322,0.306386571,0.108781159,0.370747882,0.766167468,0.340564057,0.243788689,0.334492949,0.483338057,0.162207052,0.493294774,0.17294204,0.633904316,0.025737631,0.721629897,0.145705015,0.285430308,0.129447431,0.061761563,0.218734081,0.135373884,0.069019504,0.205145291,0.265420201,0.064483816,0.181835101,0.057106356,0.068188126,0.163584281,0.009856915,0.013945462,0.014839991,0.046154364,0.051079587,0.00630367,0.025753489,0.029280055,1.664006346,0.437649084,7.437588644,0.894510878,0.487067206,0.197632935,1.804058121,0.542177747,0.089787685,0.224459785,0.085474631,0.083273934,0.079775746,0.146393473,0.570491164,0.035865602,0.082784589,0.046032741,0.060830476,0.073032785,0.032400472,0.06933737,0.038115055,0.012934148,0.011089944,0.008236037,0.060467406,0.018509112,0.031333351,0.008015054
E07000071,2014,0.523859001,0.587780882,0.593182592,0.300197047,0.186473877,0.163602163,0.605005106,1.44591181,0.300032442,0.370192973,0.198158605,0.335048675,0.377150081,0.802107483,0.789800809,0.249229939,0.799576687,0.01756281,0.127083047,0.907662961,1.010764973,0.719594487,1.063018197,0.315645291,0.467438175,0.377818518,0.134177211,0.858861979,0.082394486,2.125409976,0.065090927,0.242489561,0.211944842,0.98589732,0.668494181,0.203754434,1.406628554,0.420488583,0.29191132,0.089007616,0.299363792,0.107678875,0.348265943,0.728312871,0.331785497,0.230793492,0.308318375,0.454530374,0.156496791,0.465421975,0.170583782,0.61838006,0.025273517,0.689644523,0.158342033,0.266170902,0.124173359,0.060221328,0.184575848,0.11979863,0.07023763,0.203902224,0.31648409,0.059470341,0.174540741,0.058588249,0.063568962,0.158042007,0.009586379,0.012205652,0.014842641,0.046463103,0.044878022,0.00561507,0.025859852,0.025232342,1.591171457,0.399689733,6.851922973,0.750707562,0.438307637,0.196126169,1.794059315,0.444610166,0.091007218,0.201861485,0.080931381,0.065330929,0.074516811,0.153063471,0.545159307,0.035701704,0.082013242,0.045141041,0.059658485,0.071358197,0.029478523,0.064731936,0.032927579,0.011961061,0.011184233,0.007722348,0.085866885,0.018755383,0.029161449,0.009124139
E07000072,2014,0.582557128,0.626077605,0.628222471,0.3167858,0.209068906,0.177727314,0.6520203,1.468311148,0.310041664,0.40042752,0.211539545,0.369596094,0.408504162,0.809651883,0.827043138,0.265554936,0.859865918,0.020945335,0.131762997,0.958420342,1.065991628,0.764690381,1.114892165,0.335440531,0.504427051,0.405960052,0.146786134,0.918084143,0.084659087,2.288489192,0.069017484,0.255136186,0.224962379,1.034146506,0.697101887,0.211367233,1.590305955,0.455325524,0.304666625,0.089060546,0.320605422,0.113517942,0.370210523,0.744937966,0.350581058,0.243411999,0.326526683,0.48256294,0.165603821,0.500909485,0.176603572,0.656115971,0.024954914,0.715109853,0.164088706,0.265232838,0.133920772,0.062754229,0.211164804,0.131126323,0.076308822,0.221736606,0.304785616,0.064451931,0.169406504,0.055678998,0.06883245,0.16318312,0.009915819,0.016745853,0.013507913,0.052075364,0.046745169,0.005675937,0.025766236,0.025702749,1.672674444,0.406454717,7.42806523,0.856068043,0.454913838,0.186757904,1.814530727,0.444213053,0.09072019,0.221451419,0.080748446,0.094895711,0.07151055,0.151768743,0.546806165,0.035032222,0.081057114,0.044434643,0.058752379,0.070410056,0.032153855,0.065851483,0.038771498,0.01139415,0.010977956,0.008183809,0.083814518,0.019545898,0.030976555,0.009800066
E07000073,2014,0.511587045,0.579699138,0.583401037,0.298537858,0.177756162,0.156201702,0.578297063,1.345115166,0.298728102,0.361681962,0.190994796,0.323573184,0.363502027,0.783884282,0.76795412,0.241848633,0.781213459,0.015942903,0.126834387,0.891760935,0.986101788,0.686125557,1.036004492,0.300283932,0.461393113,0.371769543,0.126581764,0.826231846,0.080321808,2.078707679,0.064206368,0.233186965,0.200067118,0.968792523,0.659221582,0.196149737,1.386396041,0.402754411,0.281964177,0.102425152,0.287952565,0.104112417,0.332185217,0.722289986,0.327361405,0.223533509,0.298449558,0.453412879,0.153189362,0.458167555,0.171654238,0.60510194,0.023835019,0.683556765,0.149146748,0.262732835,0.115334538,0.059001533,0.189787368,0.117887163,0.063326872,0.192390349,0.298920498,0.057650891,0.179833298,0.056295037,0.061030965,0.163122092,0.009727814,0.009902311,0.01360794,0.043430625,0.045837568,0.005009525,0.026060061,0.026040051,1.465281291,0.399943154,6.631831341,0.706552662,0.433912416,0.191634442,1.772297783,0.473342965,0.088563867,0.193889895,0.078864092,0.060445544,0.075430271,0.145709607,0.532806359,0.038401487,0.087941673,0.047997735,0.063124625,0.075390196,0.027844271,0.065042119,0.029883163,0.011483524,0.012093007,0.007882076,0.086338023,0.017174908,0.028583427,0.009569129
E07000074,2014,0.613996277,0.651176726,0.654479428,0.329269522,0.214854968,0.189823505,0.671145984,1.596794304,0.319846251,0.414221613,0.224958298,0.400643972,0.421229504,0.819479108,0.86039887,0.277496853,0.902987887,0.022120553,0.129776583,1.003153069,1.095994478,0.816301733,1.166342595,0.367176391,0.540435253,0.426441125,0.160049473,0.995355114,0.082754993,2.415352127,0.066770039,0.263282332,0.248992353,1.068976483,0.715422195,0.2166458,1.70112009,0.494591904,0.319257637,0.06938666,0.342026895,0.118276392,0.394897049,0.794929731,0.356776658,0.253590383,0.342873907,0.482510624,0.170161775,0.523002496,0.172033572,0.688308502,0.02582452,0.764061633,0.161978554,0.280581899,0.148408247,0.066052213,0.221299325,0.143548747,0.082352335,0.239957912,0.317101435,0.068730284,0.165027424,0.05680718,0.072474022,0.171476151,0.010623409,0.014743967,0.013016638,0.054523869,0.050188239,0.00727917,0.027347884,0.030193505,1.776014321,0.377202339,7.646721745,0.908618333,0.444353033,0.177009765,1.798756068,0.400746591,0.090096244,0.207042588,0.075932629,0.08442529,0.06885005,0.156475484,0.544921585,0.034193207,0.078921549,0.04395041,0.058451214,0.070426765,0.03027428,0.064091442,0.042806716,0.013891239,0.010488125,0.008268055,0.094213494,0.020440449,0.033849633,0.010290526
E07000075,2014,0.601937348,0.642474259,0.646408496,0.324132716,0.208514616,0.182400131,0.654344,1.500629489,0.32147422,0.407723102,0.220955717,0.387700264,0.411608563,0.824482759,0.865582759,0.272461014,0.884535715,0.019817925,0.12971671,0.994275702,1.082787974,0.801204217,1.154002533,0.355695145,0.529925822,0.421532455,0.151375875,0.971838046,0.082466666,2.38097154,0.067009523,0.259706032,0.236150433,1.052369126,0.717656894,0.212519695,1.687964618,0.477471996,0.313193442,0.071593341,0.33998312,0.116027416,0.375745799,0.809251117,0.356602466,0.247566829,0.341337078,0.478199804,0.168956362,0.516938251,0.174189293,0.686010714,0.023987304,0.757849374,0.156743049,0.281153454,0.142679846,0.063940948,0.221849221,0.141422278,0.080590455,0.232797404,0.306257901,0.067892387,0.161186351,0.053930272,0.070515925,0.171130982,0.011459208,0.013352566,0.012694716,0.052737262,0.050272297,0.006453483,0.028369251,0.030253631,1.701713997,0.39597374,7.525040275,0.875922201,0.448518404,0.184536059,1.783231481,0.442488708,0.089158021,0.207724181,0.078676587,0.084416593,0.07252007,0.150251695,0.539678297,0.034863694,0.080875899,0.045214328,0.059574515,0.072041155,0.030107403,0.066812016,0.038847563,0.012699404,0.010797092,0.007858621,0.077642468,0.019932002,0.031513712,0.008597615
E07000076,2014,0.585565816,0.600849671,0.626490873,0.326739543,0.206974289,0.187836214,0.642176125,1.511402869,0.312453373,0.403032252,0.225997619,0.382428545,0.392408643,0.786899245,0.838625535,0.265444877,0.857433239,0.01817804,0.122738558,0.976578358,1.036016167,0.812555581,1.145137764,0.365594697,0.532384599,0.398345232,0.150569999,0.94916528,0.080034532,2.370462184,0.062753948,0.249908608,0.251949731,1.020352139,0.685857477,0.217197937,1.588717153,0.480700318,0.31684935,0.074780236,0.335494355,0.120261994,0.394780019,0.82116774,0.322310706,0.250209266,0.332697819,0.438958276,0.167003875,0.50703127,0.158407441,0.693008883,0.024868034,0.695587131,0.16450558,0.299596467,0.15018219,0.063856354,0.173507002,0.142369869,0.087174146,0.243011224,0.3365001,0.073260885,0.15786045,0.059285707,0.074537198,0.15887079,0.011865451,0.014219547,0.013438585,0.054776253,0.051770532,0.006771763,0.024733089,0.034621938,1.588835093,0.333655875,7.033539542,0.778884056,0.363517642,0.157643508,1.597101155,0.307203974,0.082176487,0.153904298,0.062793022,0.064750533,0.06357216,0.14111519,0.446498399,0.032671565,0.074854133,0.041895227,0.055222843,0.066694195,0.029173008,0.054602363,0.034690992,0.012936109,0.010068808,0.00648957,0.098101659,0.017851244,0.030240717,0.009317758
E07000077,2014,0.588991711,0.636416082,0.632683338,0.308477962,0.20318018,0.176883575,0.647366869,1.362196823,0.316204361,0.400191373,0.211597398,0.372932082,0.41015023,0.796042208,0.84395297,0.266876617,0.878271227,0.019656419,0.126932143,0.969292813,1.072039022,0.768931326,1.113319035,0.333305851,0.516888683,0.412670871,0.147936629,0.919725821,0.081723662,2.278406803,0.065245284,0.258687882,0.220106846,1.029606983,0.698543604,0.209598848,1.643954841,0.455612888,0.30162754,0.069705709,0.316241576,0.109921599,0.361225704,0.763584634,0.355063933,0.244403827,0.335613486,0.481741428,0.163607512,0.506543858,0.173901085,0.654675822,0.023589495,0.754171411,0.149613501,0.256652344,0.135238999,0.063188074,0.228732964,0.136493749,0.070006441,0.218659353,0.269427943,0.06622442,0.161084729,0.05091722,0.068325056,0.169741401,0.010537325,0.01376728,0.013012466,0.049004696,0.049411016,0.006133428,0.027457106,0.031257495,1.667679429,0.408612232,7.524630734,0.900266198,0.470180153,0.185786429,1.786438575,0.459947537,0.091637276,0.209763616,0.080676237,0.081985069,0.074755298,0.149995563,0.549750591,0.039701603,0.09167085,0.051670889,0.068063773,0.082191495,0.031849168,0.067827325,0.0400035,0.011769659,0.01234754,0.008492916,0.063702956,0.019703187,0.0341628,0.008549187
E07000078,2014,0.541204621,0.606657992,0.617354974,0.302827654,0.196044509,0.166878592,0.631745588,1.491235371,0.303089416,0.373638625,0.201030031,0.344735123,0.39692588,0.816713555,0.80940729,0.254358336,0.822884289,0.019221519,0.131241478,0.926604109,1.028987675,0.733063319,1.089864448,0.317720225,0.482258823,0.383562702,0.13853552,0.869744769,0.084913129,2.17562989,0.065618103,0.247736628,0.21691622,1.013862373,0.677086456,0.208948491,1.492809773,0.429175522,0.303299656,0.089040885,0.304961066,0.108580612,0.360944266,0.762019291,0.34421761,0.237531152,0.319322326,0.467282233,0.162848504,0.48023498,0.173546491,0.633526352,0.025606201,0.715414252,0.157476038,0.267663513,0.126495882,0.062001671,0.201392343,0.124924897,0.071781756,0.208526179,0.326441325,0.061988938,0.180073167,0.058516239,0.06581752,0.165733191,0.009796235,0.014658712,0.015576464,0.047558611,0.046671959,0.005683549,0.026454301,0.025813668,1.757544974,0.472404335,7.507397536,0.849663635,0.489305424,0.213029195,1.894675663,0.5293505,0.094677328,0.237377947,0.089672183,0.079459559,0.079325855,0.168309659,0.591959468,0.034392053,0.079537738,0.044314221,0.058257667,0.070243309,0.035424649,0.072615457,0.035624575,0.014571216,0.010733924,0.008184299,0.086487025,0.020256792,0.029308757,0.009372014
E07000079,2014,0.614325038,0.660538037,0.661579743,0.329739063,0.215453019,0.19651473,0.674358513,1.586432408,0.333607308,0.425415079,0.2316097,0.402878462,0.427007291,0.82485076,0.883977228,0.283526985,0.919089158,0.018461346,0.129894377,1.028271053,1.106534684,0.837849434,1.1964065,0.375529359,0.555823247,0.42780695,0.157144288,0.989588173,0.080983253,2.463763869,0.06511243,0.264043022,0.249009062,1.072536887,0.727683661,0.226320238,1.700853947,0.498105652,0.320287787,0.0711108,0.340681604,0.12224773,0.395027762,0.856420038,0.350531139,0.259109803,0.351065291,0.475660624,0.173408006,0.536606619,0.171018975,0.708044661,0.024892028,0.784538689,0.157798535,0.280469258,0.14812478,0.067719178,0.207272318,0.144846389,0.083061719,0.244899712,0.32074377,0.07360889,0.162312644,0.058278649,0.074762166,0.179040689,0.012078885,0.01264151,0.013119819,0.054615828,0.052125088,0.006678513,0.027722958,0.039220957,1.716400453,0.384176819,7.684443966,0.873058293,0.43294047,0.180768065,1.803946186,0.355795182,0.094630288,0.187535897,0.075445193,0.074399192,0.071761362,0.167635983,0.537437114,0.034912164,0.081734222,0.045651314,0.059587387,0.072289471,0.029447788,0.062357629,0.03653303,0.012702781,0.010517741,0.008715022,0.0840086,0.019632079,0.035300068,0.012345825
E07000080,2014,0.610513409,0.652411939,0.658532786,0.335441546,0.209235077,0.190873965,0.664918626,1.613370035,0.327528913,0.418386577,0.228613366,0.394860073,0.420731179,0.840524168,0.887831348,0.277834372,0.911105538,0.019563106,0.130273488,1.021650998,1.098729833,0.82369436,1.190052164,0.370109527,0.547593872,0.430345907,0.158074003,0.99741106,0.081489432,2.456444442,0.067797263,0.264843088,0.244503648,1.073351273,0.728950086,0.220676084,1.716460859,0.49442291,0.320992493,0.078963092,0.340473977,0.119402298,0.391852711,0.845452316,0.364716015,0.25352304,0.344658004,0.478005147,0.173290324,0.532037161,0.174230333,0.701171083,0.024470534,0.791541126,0.15618774,0.283763469,0.14771988,0.066320432,0.217765239,0.146085095,0.082915139,0.240173953,0.325138037,0.070813734,0.163917249,0.055930443,0.073111945,0.18186618,0.011746702,0.013081351,0.012611252,0.053760922,0.053342549,0.007112705,0.029287252,0.034870673,1.785582249,0.393465542,7.70914515,0.898667805,0.449906849,0.187152156,1.83713312,0.415628473,0.09294527,0.196173381,0.077971634,0.076272567,0.073757849,0.170119252,0.541248967,0.034955079,0.080759689,0.045613093,0.059772698,0.072168305,0.030723304,0.065071339,0.039156582,0.014934292,0.010802455,0.008397522,0.092892515,0.019918425,0.033266485,0.010833077
E07000081,2014,0.507741661,0.581978809,0.591147254,0.300783959,0.177059592,0.159462948,0.592615896,1.471494302,0.301735153,0.364806139,0.195710859,0.328331872,0.368873577,0.822026961,0.788032048,0.246222829,0.795540781,0.016132696,0.128614451,0.906804479,1.005967461,0.714508145,1.064225327,0.310105112,0.467345523,0.378274387,0.128920509,0.844658599,0.082955833,2.115446799,0.066190111,0.240153025,0.208231012,0.987547129,0.678055633,0.202681366,1.367376438,0.413460538,0.292586438,0.097831364,0.302179954,0.107767825,0.33722643,0.737633655,0.334155018,0.227432894,0.303853152,0.451760847,0.154277549,0.459663899,0.174593798,0.615194865,0.02547712,0.687955553,0.16265424,0.275181139,0.119876544,0.05885781,0.179157266,0.115579674,0.068923898,0.200473514,0.340498132,0.05819358,0.181125505,0.059700019,0.062447622,0.165280128,0.009722183,0.011687324,0.014645094,0.045134176,0.045612707,0.005034915,0.026080438,0.028078995,1.563399015,0.399087535,6.662231434,0.706925213,0.431984761,0.200544947,1.803321478,0.470851077,0.089393144,0.188294708,0.080293488,0.058775088,0.07696818,0.147841007,0.532423702,0.038626796,0.089321375,0.049006756,0.064644265,0.077490066,0.028994816,0.06509979,0.032321058,0.01080591,0.01220443,0.007571378,0.107385299,0.018777361,0.02836598,0.008949752
E07000082,2014,0.601551364,0.647336322,0.650798205,0.322158238,0.213064756,0.188046815,0.665088695,1.49155068,0.32418231,0.411540333,0.219362248,0.385068062,0.42339159,0.810967824,0.856677701,0.276696972,0.896809316,0.018848675,0.130228723,0.996812652,1.083935688,0.794549188,1.152615988,0.353820169,0.537364316,0.416109411,0.157928349,0.954167238,0.084214775,2.361514012,0.065329047,0.262391462,0.234299445,1.060454816,0.70596997,0.219500223,1.680852639,0.471710503,0.313765738,0.076584079,0.325395696,0.116433197,0.386345403,0.823518082,0.350087823,0.255426026,0.347240976,0.481947209,0.171948059,0.523775603,0.171976161,0.677703156,0.025238149,0.781105863,0.152258883,0.273793439,0.142576242,0.068050621,0.223669269,0.142868973,0.07724123,0.232513075,0.290638703,0.069601416,0.168726291,0.056979487,0.072149714,0.175867965,0.011010697,0.012875595,0.013755966,0.052162883,0.05163931,0.006675347,0.028156011,0.036381179,1.713455407,0.406831218,7.737955326,0.90778895,0.466462588,0.18698688,1.859950273,0.418374739,0.094967034,0.204905794,0.078787427,0.080869574,0.073637476,0.164527103,0.564430342,0.03720356,0.086329112,0.048230285,0.063856524,0.07694384,0.03038669,0.0677415,0.037564495,0.012138016,0.011418873,0.008807205,0.069384129,0.019477127,0.034828749,0.011764914
E07000083,2014,0.594679298,0.642945433,0.648610473,0.325986657,0.202369031,0.181973072,0.646800526,1.502259804,0.325308566,0.408898141,0.223723206,0.383750938,0.408645888,0.826813469,0.8741034,0.272241275,0.893091444,0.018397889,0.130365229,1.00677178,1.083869407,0.803056377,1.165901761,0.353657855,0.534873438,0.42465519,0.147737857,0.960150058,0.080470848,2.398113619,0.066959895,0.259408923,0.236235654,1.054411728,0.72747305,0.215979536,1.681808075,0.480515743,0.313775138,0.078604759,0.331766617,0.11649296,0.37254317,0.82982355,0.357394646,0.247270266,0.342028913,0.474490264,0.168117409,0.521869491,0.172445521,0.69012294,0.024374187,0.785604096,0.152770441,0.273378888,0.139982462,0.063932762,0.222755971,0.141625242,0.077865859,0.230231642,0.313209909,0.069534339,0.161999085,0.053007331,0.071020163,0.180177739,0.011916585,0.012479009,0.0128386,0.051073578,0.052212755,0.00639651,0.029981263,0.033735969,1.721279668,0.401447526,7.555993114,0.871333033,0.450784318,0.188394186,1.799304105,0.451575858,0.091521385,0.196738815,0.078514654,0.068399725,0.07478355,0.158750582,0.533504566,0.035913355,0.083311401,0.046317082,0.060715912,0.073368595,0.031347524,0.067382317,0.037222386,0.01363168,0.011075475,0.007808613,0.089310722,0.019251201,0.032733827,0.010304316
E07000084,2014,0.572030645,0.630586202,0.635174852,0.308276731,0.204191702,0.169415157,0.6539279,1.377926424,0.311089422,0.386149988,0.200343692,0.352517652,0.414658555,0.821165007,0.821965963,0.259574908,0.843670948,0.021280219,0.135619158,0.94480733,1.067321354,0.73459013,1.088322803,0.31678169,0.492411722,0.396709143,0.146269886,0.891460949,0.091887519,2.194668466,0.067416174,0.259173965,0.213458868,1.039241562,0.690272496,0.209147448,1.595520826,0.42941837,0.303954202,0.096889708,0.307830283,0.10776395,0.373369837,0.743052801,0.357770946,0.244260108,0.331292305,0.498463483,0.17032772,0.497573874,0.178892582,0.638562129,0.026285609,0.733512071,0.157079791,0.273278902,0.128016239,0.064525494,0.236285822,0.132104774,0.069421129,0.207854581,0.27668708,0.06111065,0.18697513,0.055595809,0.067463729,0.16237492,0.009459951,0.01566307,0.017005614,0.048120003,0.047682023,0.006067757,0.026834326,0.024175244,1.705382164,0.436643193,7.616084173,0.9133678,0.500696082,0.197181046,1.891882921,0.558730163,0.09167462,0.245613755,0.08906553,0.091015335,0.07730763,0.153004256,0.596752822,0.037981634,0.087525115,0.048200399,0.063811194,0.076179001,0.033022562,0.072658647,0.039792593,0.012776663,0.011927007,0.008605619,0.070582476,0.019991621,0.031106125,0.00865066
E07000085,2014,0.622094702,0.659094286,0.66042102,0.322168887,0.217237609,0.184542238,0.675727591,1.422266383,0.323684559,0.41076521,0.217883236,0.391712594,0.430195206,0.810023495,0.855401785,0.276842818,0.902149273,0.020209877,0.130491034,0.997480318,1.094290778,0.791400116,1.142272359,0.3467437,0.536241371,0.417672808,0.159148406,0.950377795,0.089512421,2.344905484,0.064866087,0.26453669,0.235855286,1.067138139,0.706725347,0.217669556,1.72646473,0.470680989,0.314362394,0.074239202,0.32855438,0.11474293,0.387915562,0.817212731,0.353443303,0.25726898,0.353541737,0.494094899,0.175387081,0.533800636,0.17281431,0.685662473,0.025397828,0.765103427,0.153689802,0.279547296,0.142966258,0.067826414,0.241183104,0.144571784,0.077706216,0.230148459,0.266253958,0.069362145,0.173743152,0.055455262,0.07332955,0.168681269,0.011289409,0.014632892,0.014346889,0.053125377,0.051757277,0.006742929,0.027545313,0.032415172,1.703124498,0.419777814,7.876300114,0.949448447,0.482958489,0.184205697,1.82308314,0.469861878,0.091810171,0.218820179,0.080899099,0.096451138,0.074340815,0.15312759,0.563049921,0.037331405,0.086582985,0.048363996,0.063849867,0.077047936,0.032362571,0.069429658,0.041372955,0.011724911,0.01148947,0.008618156,0.065618245,0.019860142,0.033603427,0.009395672
E07000086,2014,0.574449822,0.63005553,0.630524881,0.307290936,0.202847269,0.17258247,0.643425564,1.38057931,0.314104425,0.389812279,0.204609131,0.361283249,0.411149755,0.810470728,0.831271275,0.261079843,0.852097882,0.018841781,0.130666105,0.958065734,1.054537038,0.742157601,1.097204026,0.32254612,0.503527039,0.402014198,0.149765192,0.899759213,0.086969564,2.21758289,0.06498011,0.25533966,0.215010019,1.029064965,0.686515601,0.21080958,1.598218203,0.435616254,0.301194452,0.086722163,0.308115172,0.108697278,0.369474001,0.781994218,0.350726622,0.245199938,0.335295591,0.484181825,0.168395188,0.504088821,0.17116298,0.647631637,0.02604389,0.742828098,0.148599034,0.26997008,0.129699478,0.064714479,0.225951191,0.136437158,0.069306192,0.211031237,0.266324954,0.06412778,0.178059431,0.054933615,0.068329307,0.171856219,0.01053535,0.014003217,0.015267871,0.047520214,0.049755958,0.006393116,0.027381133,0.031503848,1.664064794,0.43444931,7.579276373,0.903995665,0.491706768,0.198562836,1.851255893,0.524505356,0.09337316,0.222888937,0.086027488,0.081004719,0.0785711,0.156078077,0.581463672,0.036994993,0.085456178,0.047312373,0.062300648,0.074847809,0.031940645,0.07079705,0.040288518,0.01299394,0.01152387,0.008519344,0.064376406,0.019580704,0.03201463,0.009317328
E07000087,2014,0.614555579,0.654892804,0.6605776,0.329068434,0.21146158,0.184749352,0.667374759,1.502508896,0.325227391,0.412127015,0.22336208,0.390884646,0.421979355,0.838808172,0.88142242,0.27710195,0.900915167,0.021136173,0.130835797,1.016411981,1.101696201,0.807610034,1.16980848,0.35798394,0.540082663,0.429065092,0.156576154,0.978002681,0.083722778,2.416355862,0.067258755,0.267120658,0.23907235,1.067575281,0.72510006,0.217853849,1.746623681,0.483888832,0.318702908,0.07428618,0.337195854,0.115975722,0.386659317,0.826850262,0.369027105,0.254085681,0.345963493,0.489799428,0.172553639,0.531051421,0.17697031,0.699371956,0.025479917,0.783667818,0.154627576,0.284716448,0.145776624,0.066510026,0.238212326,0.146038862,0.079903152,0.233241729,0.296513648,0.070263888,0.165755567,0.053937009,0.072753903,0.179019682,0.011677503,0.01442106,0.013149009,0.052606589,0.052869615,0.007191333,0.028698393,0.032516273,1.774471832,0.4175654,7.813369258,0.926428776,0.476752761,0.192898541,1.840093021,0.484038793,0.089838336,0.216023405,0.081760132,0.083471246,0.076145354,0.159815984,0.562911925,0.035522635,0.08195375,0.045932181,0.060655037,0.073385658,0.033298622,0.06959745,0.042387146,0.014600104,0.011078566,0.00805429,0.0777066,0.020186549,0.032722248,0.008978991
E07000088,2014,0.537465456,0.593698274,0.605015098,0.306379174,0.18743438,0.168546039,0.611871646,1.473787079,0.305474937,0.378838514,0.204026432,0.349203443,0.380266627,0.815217132,0.813432929,0.252160699,0.820095312,0.01790201,0.128281667,0.935701392,1.019668604,0.74249211,1.0974932,0.328049457,0.486437966,0.390623366,0.136982588,0.884810138,0.0822981,2.21728237,0.066298702,0.246022767,0.220623599,1.005046262,0.682694012,0.20596463,1.465495286,0.434280349,0.299954734,0.092332251,0.314595261,0.109150441,0.357223557,0.75815049,0.342118543,0.233065721,0.31078811,0.456485687,0.161821613,0.478998485,0.169737709,0.63911142,0.024892318,0.70726729,0.161326658,0.275760147,0.12723848,0.061180325,0.189522185,0.125849528,0.070630465,0.211624959,0.327174217,0.060743422,0.171911714,0.057874123,0.065095172,0.166709422,0.010072436,0.01340012,0.014800528,0.04755183,0.046805159,0.005988539,0.026596201,0.029237587,1.609697196,0.385820402,6.896323321,0.766117186,0.425281482,0.189707138,1.78270867,0.45561991,0.089556241,0.189703505,0.077712837,0.063257595,0.073334482,0.148191709,0.525942584,0.037405647,0.087282222,0.047967119,0.063201968,0.076297634,0.029284287,0.065914106,0.035255084,0.013121123,0.011654588,0.007263508,0.093050469,0.018296142,0.028913205,0.008457215
E07000089,2014,0.607283428,0.647100863,0.647315374,0.310855065,0.218664727,0.179491165,0.684111787,1.300319318,0.314598416,0.403495337,0.210753365,0.36914048,0.428618364,0.814355189,0.841568264,0.270064591,0.87582617,0.022343577,0.136986335,0.964021934,1.097601314,0.762590821,1.110641038,0.327076418,0.5141639,0.407096828,0.155849667,0.91056493,0.095325205,2.244639483,0.067819279,0.267601009,0.219293899,1.067829051,0.698386735,0.21370814,1.696326252,0.443941997,0.308344152,0.085736227,0.321281602,0.112572632,0.394081105,0.771306377,0.360292766,0.255050215,0.353841946,0.509524724,0.17376725,0.515931611,0.179654068,0.662529053,0.025489874,0.738872559,0.156151869,0.28249577,0.138329928,0.066115978,0.246015897,0.138745237,0.071727144,0.218103149,0.253996631,0.066635807,0.185010354,0.055848506,0.071389035,0.161054429,0.009660616,0.016383497,0.017380143,0.050434128,0.050514413,0.006419697,0.026355426,0.026546408,1.683173408,0.432330282,7.85271622,0.954806439,0.49416761,0.185739353,1.82555493,0.54022746,0.090176971,0.236142633,0.08517756,0.109383148,0.074088361,0.14550318,0.576968276,0.039851627,0.091847929,0.051401882,0.067316925,0.081069058,0.034760544,0.071027089,0.0442827,0.011076842,0.012356283,0.008206151,0.061671645,0.019620349,0.032499831,0.007781091
E07000090,2014,0.58175482,0.622265525,0.63185321,0.320741079,0.204691178,0.181567771,0.64069193,1.483339828,0.313438496,0.400074636,0.2166951,0.377155571,0.402890806,0.800120277,0.841255126,0.265929634,0.865013341,0.018862913,0.127354735,0.972438949,1.050371418,0.783252776,1.130738137,0.346634812,0.518998985,0.406872753,0.147976772,0.929615908,0.082042491,2.323649624,0.06478064,0.253961031,0.23383806,1.025585443,0.692340738,0.213881111,1.59027527,0.464663805,0.308456147,0.075007976,0.322987214,0.114238991,0.375526001,0.791308579,0.343888606,0.247400327,0.331456575,0.4632312,0.166950774,0.506988858,0.168737079,0.669761347,0.025263769,0.73340859,0.153458339,0.274700964,0.13999873,0.063591014,0.201121951,0.138367306,0.080218035,0.227798558,0.307086543,0.068353274,0.163185799,0.056080891,0.071114447,0.165543128,0.011269015,0.013110749,0.013372666,0.051618948,0.050298427,0.006615034,0.027668738,0.031963238,1.637005592,0.390456374,7.325069193,0.832092043,0.433485892,0.182318716,1.760414026,0.404421512,0.090023721,0.192858486,0.076522157,0.069905943,0.072168606,0.153700216,0.523833972,0.036129266,0.082735997,0.046254379,0.061507066,0.073639789,0.03011257,0.063281584,0.037564169,0.012960273,0.011143038,0.00805883,0.087867894,0.018779131,0.031755645,0.010088806
E07000091,2014,0.621155453,0.648300548,0.662118188,0.331673924,0.217404606,0.191084313,0.674572319,1.480779828,0.327312489,0.419738148,0.22922545,0.400222802,0.42339135,0.81518638,0.881954747,0.27655956,0.902769698,0.01912988,0.129370588,1.027734444,1.090659124,0.826353054,1.176779403,0.367045049,0.550616603,0.422661354,0.160273097,0.989142125,0.085299026,2.431235564,0.0644024,0.266008303,0.249105758,1.063568384,0.712112541,0.22483695,1.728306615,0.492389156,0.324049475,0.073029355,0.339248521,0.119463237,0.405932471,0.860073531,0.349224807,0.262184232,0.352466489,0.473271894,0.177187531,0.53917612,0.167157702,0.718299299,0.025327317,0.753577406,0.154430502,0.300279926,0.150253216,0.067823167,0.21392065,0.153519101,0.086916748,0.242552913,0.290451386,0.075725645,0.163776717,0.056721861,0.077415903,0.169064616,0.012623826,0.013869838,0.013899341,0.054675711,0.056106286,0.007429601,0.028056742,0.037776731,1.718800946,0.383733769,7.770373048,0.921215865,0.435093617,0.176162869,1.74224829,0.425827053,0.086775804,0.190794523,0.074944923,0.074975856,0.072013052,0.153879771,0.516574846,0.033130582,0.076481419,0.042785599,0.056653704,0.068090623,0.032291057,0.063124377,0.04098281,0.013731662,0.010228561,0.007761603,0.080567476,0.018962171,0.032465135,0.009906003
E07000092,2014,0.52848035,0.603319386,0.605129229,0.293425955,0.187024449,0.156483726,0.618617825,1.322041934,0.306203283,0.362698335,0.184672261,0.322413298,0.39544303,0.814950126,0.793204355,0.245823145,0.795183615,0.017710774,0.132695932,0.903798218,1.026983609,0.683669589,1.039280165,0.291219635,0.460093703,0.371631969,0.135859505,0.82052437,0.093041859,2.045533737,0.065112705,0.250472827,0.194115441,1.009049166,0.664817272,0.203065462,1.449749932,0.388970045,0.294709457,0.115035593,0.286363611,0.102937084,0.351270267,0.73282958,0.345967295,0.234631775,0.313498956,0.483885273,0.165413349,0.468647127,0.175243813,0.605096266,0.027198857,0.699550181,0.154962289,0.269000457,0.114660186,0.064350645,0.219255385,0.122532608,0.060890966,0.189918918,0.271258357,0.055606533,0.200853831,0.056816795,0.063028313,0.162144828,0.0089842,0.013338822,0.018477794,0.044845882,0.045242689,0.005638949,0.025959063,0.023631189,1.603149271,0.448060588,7.23381307,0.830077051,0.50556075,0.210733467,1.932945972,0.589154881,0.093211242,0.230513994,0.091798531,0.079590059,0.08263537,0.146536196,0.610371807,0.037076259,0.08494257,0.046450495,0.06155617,0.073427476,0.033420703,0.074413168,0.034531594,0.011331605,0.011854046,0.008820907,0.059743448,0.018852215,0.030867914,0.007910101
E07000093,2014,0.588648215,0.636534193,0.640608722,0.320160643,0.204273402,0.183429418,0.654381585,1.518675516,0.321335172,0.403387143,0.216829402,0.37844974,0.412477191,0.827761149,0.851072012,0.270629741,0.881805131,0.018595453,0.12925313,0.98820611,1.081344673,0.787799107,1.141699227,0.348341665,0.521188528,0.414155549,0.150415348,0.940965278,0.08560026,2.321132508,0.066214346,0.260877498,0.234389912,1.049070822,0.710194563,0.2180452,1.626243088,0.470695182,0.310597299,0.081173516,0.323585724,0.115311438,0.378082552,0.799993829,0.351218536,0.250391219,0.336417845,0.477542726,0.1689606,0.513312867,0.174103187,0.670141023,0.025563076,0.754714124,0.159254895,0.281116272,0.138422114,0.066336072,0.210940764,0.136007338,0.077911396,0.227773209,0.307181339,0.067798793,0.170471519,0.058415286,0.070618657,0.170782288,0.010722865,0.013468757,0.014416255,0.051843079,0.049526749,0.006449558,0.027591294,0.032889038,1.703377858,0.385637804,7.469071378,0.852689289,0.452568211,0.186623169,1.851193295,0.413283151,0.093103966,0.200664611,0.078480714,0.075093644,0.075590944,0.163047463,0.544681359,0.036700522,0.084565665,0.047004084,0.062202532,0.07454976,0.030604665,0.065225775,0.039254927,0.012774687,0.011465711,0.008460749,0.087030553,0.019425932,0.033923829,0.010605949
E07000094,2014,0.609782452,0.643886128,0.646481369,0.31981386,0.219898668,0.180706752,0.675496769,1.419702687,0.317574957,0.406245539,0.213438132,0.374772133,0.424801729,0.813609639,0.842183211,0.27128344,0.880927935,0.02069539,0.133790354,0.977279046,1.081607324,0.767601278,1.120010847,0.332707372,0.519358614,0.412945488,0.156145559,0.923091143,0.089982097,2.291887316,0.066756122,0.262374475,0.226053843,1.05032822,0.696005438,0.216055841,1.69102525,0.454955138,0.308869293,0.088821237,0.319723363,0.113136368,0.38517195,0.79375446,0.351336868,0.253977025,0.344496447,0.496686825,0.173814577,0.524961053,0.173557501,0.672062112,0.025710357,0.740977205,0.157293672,0.271560716,0.139328516,0.066132557,0.235435426,0.138118212,0.076798726,0.222544783,0.267185066,0.068115455,0.176638577,0.055591176,0.072359629,0.165011912,0.010571356,0.017520654,0.014552922,0.052144711,0.050075608,0.006293623,0.027497186,0.029261073,1.740399432,0.442565028,7.988425867,0.948781479,0.503915023,0.197746729,1.865533965,0.505544028,0.093662689,0.238492947,0.086463162,0.11312768,0.076148798,0.163079708,0.5741466,0.036826582,0.085411334,0.047858818,0.063103438,0.075948591,0.035641737,0.069851883,0.040241003,0.012402863,0.011408033,0.008740776,0.065344174,0.020753467,0.032892686,0.010086316
E07000095,2014,0.553528882,0.60607544,0.610735034,0.295682923,0.201021524,0.163362823,0.63309252,1.209057573,0.303506072,0.372827089,0.194670451,0.329966176,0.401153342,0.779926207,0.774026505,0.251131912,0.806892762,0.0178999,0.133713544,0.910761955,1.02284012,0.694166515,1.036036021,0.297419793,0.480780423,0.370918145,0.14512533,0.856686678,0.092697933,2.053234496,0.060381935,0.247032961,0.203010709,1.006100664,0.651205009,0.205379101,1.476199569,0.407833048,0.292304838,0.099469676,0.289983659,0.105423864,0.373565041,0.762403601,0.32860088,0.244750465,0.33422234,0.48780898,0.164379119,0.485125191,0.172085828,0.615691216,0.02722336,0.681046715,0.146214829,0.30578775,0.124419705,0.062537587,0.214347714,0.128902555,0.064853361,0.196194898,0.243933509,0.062103421,0.201972604,0.062073709,0.068109896,0.154423707,0.009564833,0.01352392,0.017191128,0.044679866,0.049857709,0.006060059,0.02433553,0.027026355,1.551307112,0.43767413,7.253978387,0.862146383,0.484074751,0.192249016,1.78843113,0.545115201,0.089769256,0.217868108,0.083120947,0.088500992,0.077921666,0.14259327,0.561646921,0.037984541,0.08787035,0.048371506,0.063544247,0.076292741,0.032113372,0.067352219,0.037354148,0.009825148,0.011884821,0.008294497,0.054687654,0.01792858,0.030470632,0.008553586
E07000096,2014,0.549354506,0.605223815,0.61211955,0.295839496,0.200842407,0.165257013,0.63659104,1.272377217,0.302057858,0.375885722,0.19481988,0.335933879,0.399879636,0.781084185,0.785052253,0.251429078,0.809786836,0.019167648,0.133545718,0.91307481,1.026144556,0.71003987,1.048826163,0.303390037,0.480119279,0.374562163,0.143430619,0.851082947,0.091948072,2.09473984,0.062792283,0.248297575,0.20730132,1.009362949,0.657227289,0.207497745,1.49891816,0.409430665,0.294950509,0.092722303,0.296895475,0.106061968,0.372802965,0.730092969,0.331534811,0.242192878,0.331225519,0.482646296,0.164875604,0.484366415,0.172786163,0.621098112,0.025858982,0.690171915,0.154072405,0.288945383,0.125402804,0.062506444,0.21423885,0.128197156,0.06692007,0.200592772,0.257530187,0.061405467,0.195618834,0.059685174,0.067505217,0.155504492,0.009296966,0.014656888,0.018224766,0.045241695,0.048422525,0.005789705,0.024676531,0.025389415,1.564773465,0.422808757,7.271598238,0.840258229,0.471554779,0.186216613,1.7887629,0.532130227,0.089250181,0.221004929,0.082049606,0.084147882,0.074776937,0.142254837,0.559347111,0.037282557,0.08646986,0.047443668,0.063109035,0.075201702,0.031336787,0.068057545,0.036022578,0.011078095,0.011717355,0.008027557,0.071177215,0.018815645,0.030312905,0.008770839
E07000098,2014,0.530793567,0.583603075,0.597788187,0.282807479,0.19483411,0.163695023,0.629752695,1.229058769,0.299761157,0.372090443,0.191272318,0.320172425,0.386854298,0.792955812,0.76964734,0.244099271,0.783217368,0.0178158,0.13555244,0.898631165,1.007540337,0.691317376,1.032350418,0.29726018,0.470917965,0.363900229,0.140212221,0.817638695,0.096630907,2.032565305,0.064108133,0.240423006,0.201127893,1.011232552,0.65228993,0.205361855,1.398968844,0.389715593,0.290444752,0.10850951,0.297685179,0.10751343,0.374427278,0.71874654,0.318748489,0.236698271,0.322107654,0.471696249,0.16393668,0.46926611,0.166416169,0.614249905,0.026282914,0.654185224,0.162570493,0.289461996,0.120539441,0.063642327,0.19192696,0.122331902,0.062635712,0.196663822,0.260864427,0.06133923,0.210321285,0.059634995,0.065472713,0.151007929,0.009135483,0.016090936,0.019409671,0.045255465,0.045762503,0.00561302,0.023474725,0.024065101,1.433144226,0.397081893,6.833938128,0.752357274,0.433564462,0.178824721,1.700395526,0.498576553,0.087441204,0.196576306,0.077302774,0.088245894,0.069878805,0.129483447,0.526999718,0.038862324,0.090043488,0.049469122,0.065607914,0.078389859,0.034208096,0.063720864,0.031234636,0.009174252,0.012193059,0.007442251,0.066368064,0.018190662,0.028078718,0.007427996
E07000099,2014,0.556651057,0.613328602,0.6201107,0.303636492,0.20398108,0.170181757,0.646904239,1.399510162,0.305382297,0.386481632,0.203016685,0.348374934,0.404083453,0.803675766,0.812210052,0.25797235,0.832186712,0.020041818,0.131716871,0.934575939,1.05111905,0.740494279,1.081400004,0.318187545,0.491245339,0.38595272,0.143466269,0.872529433,0.089200356,2.175414321,0.066296252,0.253881722,0.213037237,1.019214812,0.678681576,0.209990137,1.542017242,0.426641611,0.298701697,0.088294639,0.30522195,0.109042259,0.364625825,0.735721584,0.343906272,0.242989272,0.330241466,0.480202092,0.164795323,0.489642974,0.175107233,0.638082195,0.024966965,0.704449733,0.163114601,0.27655748,0.129007229,0.062289668,0.214247419,0.126937138,0.071255875,0.210669956,0.288518728,0.062573623,0.181630008,0.057600397,0.06789064,0.157342852,0.009454605,0.014282417,0.017181856,0.048184183,0.047164667,0.005533403,0.026131527,0.026603787,1.638450379,0.402043429,7.378348542,0.854794491,0.461440046,0.187422946,1.83091095,0.484157658,0.092085598,0.22607427,0.082828851,0.087043727,0.074210863,0.146064772,0.555043348,0.037477822,0.086407409,0.047618532,0.063264065,0.075723766,0.030318679,0.067348835,0.036043978,0.011600114,0.011647863,0.008298003,0.071190661,0.018984372,0.030808,0.008902655
E07000102,2014,0.571646816,0.623719742,0.618649354,0.307341151,0.203096123,0.174352987,0.640198855,1.37428499,0.308811568,0.396598658,0.205405236,0.35876536,0.406009174,0.783779734,0.827302991,0.261961057,0.858377542,0.019925385,0.128051895,0.946335037,1.055890034,0.75158797,1.096447766,0.325334863,0.499126241,0.401393811,0.143301331,0.885203986,0.081276394,2.234073858,0.06624021,0.254445539,0.212227496,1.018151353,0.683352748,0.208947291,1.559629357,0.44073842,0.296823585,0.075190255,0.307538581,0.10892542,0.351919173,0.728867146,0.350806222,0.241659934,0.326744314,0.479154329,0.160394075,0.493392776,0.176867081,0.640828704,0.023673174,0.727250399,0.150729404,0.244084125,0.131737046,0.060234389,0.215379741,0.131265162,0.069582291,0.213726186,0.275380464,0.063513884,0.165924353,0.052669946,0.066932475,0.163215615,0.009689786,0.013370988,0.013550522,0.048915422,0.046962318,0.005717875,0.026970793,0.028090142,1.616098998,0.422871245,7.374733796,0.845291684,0.465400924,0.18657572,1.80410914,0.450841604,0.093930679,0.218190222,0.082043338,0.077262451,0.073977374,0.151868034,0.556968136,0.038782256,0.089970396,0.049527068,0.065308524,0.078855603,0.029896228,0.068153632,0.037693318,0.011245746,0.012188514,0.008991825,0.070146881,0.018790675,0.033716745,0.009271879
E07000103,2014,0.506824532,0.575759654,0.580468381,0.279749964,0.194053221,0.149300113,0.619589533,1.175119065,0.285818596,0.346465608,0.171203201,0.291640392,0.396066383,0.76017166,0.714040205,0.232844559,0.74527956,0.017896111,0.138351937,0.832055008,0.98116538,0.622808759,0.959198989,0.263299086,0.433859223,0.333165536,0.138026148,0.775055968,0.097693107,1.825031624,0.05764581,0.236006466,0.18305345,0.972453223,0.60479913,0.199813396,1.319082057,0.353506294,0.2812024,0.120104172,0.257876916,0.096914772,0.361176989,0.676621474,0.310826405,0.236870453,0.32064176,0.486326221,0.16131413,0.450406479,0.170925314,0.557125358,0.028234955,0.630166178,0.153321699,0.294705251,0.112212756,0.063172151,0.199439879,0.117268367,0.057786983,0.176908445,0.235785539,0.054941312,0.220175571,0.063559503,0.06315807,0.144578504,0.007540424,0.0134537,0.021985782,0.040308327,0.046076685,0.005098426,0.021822711,0.021193291,1.518765868,0.473463012,7.136983313,0.833322302,0.511718129,0.20305927,1.88141002,0.618394352,0.090231457,0.248605459,0.090085768,0.097374861,0.079552025,0.141321945,0.622172279,0.039037709,0.088684272,0.048902569,0.064379828,0.076932307,0.032342202,0.070790621,0.031906542,0.011128138,0.012385904,0.008716744,0.053799087,0.017975843,0.030269074,0.009122539
E07000105,2014,0.553901431,0.604546159,0.612698212,0.300228174,0.196348136,0.170086594,0.631407163,1.356804998,0.309378165,0.381833631,0.200677534,0.343762736,0.394864551,0.805573184,0.809220675,0.253582273,0.821955849,0.017058458,0.128328643,0.937151981,1.032729601,0.727643481,1.074561693,0.319267054,0.490101705,0.385183589,0.145283856,0.868029164,0.090147343,2.146755577,0.06372217,0.250568959,0.214748565,1.011131108,0.672758246,0.210285486,1.49403078,0.421188094,0.298855611,0.095468209,0.303014811,0.109119218,0.370001757,0.753543399,0.334863009,0.242726875,0.326516154,0.46985424,0.167875339,0.489900699,0.167853485,0.635613396,0.026350909,0.701538399,0.156582288,0.284055819,0.127966421,0.064488822,0.203243922,0.129703129,0.068601591,0.206768773,0.274242451,0.063581055,0.184991863,0.05913564,0.067687321,0.161220218,0.010189883,0.01344911,0.017106221,0.046894454,0.048225352,0.006370174,0.026131026,0.029849398,1.53402608,0.379173035,7.060441305,0.802849919,0.444135306,0.184190557,1.786757243,0.461760845,0.09042572,0.192715069,0.07838238,0.072703256,0.074504972,0.144637207,0.537838159,0.041043842,0.094577957,0.052799597,0.069989051,0.084183111,0.029745744,0.064739492,0.035255349,0.01246555,0.012702097,0.008188834,0.064086864,0.018636196,0.030822716,0.008911591
E07000106,2014,0.559534091,0.601428623,0.614234279,0.30928112,0.200940427,0.17377528,0.631649772,1.476916308,0.305641787,0.385950211,0.208890308,0.36067446,0.392814837,0.804054636,0.816517176,0.257467346,0.831798337,0.019336042,0.126077493,0.937419862,1.028081531,0.752851333,1.097021204,0.334062558,0.490785041,0.389902328,0.142786282,0.904895574,0.082176406,2.232105359,0.064826595,0.249067738,0.227286697,1.004337638,0.671796131,0.208695454,1.500581859,0.445679626,0.302374972,0.075801826,0.312748977,0.110409351,0.37079834,0.756295492,0.335911004,0.240609846,0.320778494,0.461588005,0.163186929,0.488326821,0.166336908,0.648774094,0.026530829,0.6892702,0.156465756,0.269659002,0.135224518,0.061221266,0.188156519,0.132266059,0.07594961,0.21842416,0.311415557,0.06536372,0.165635826,0.057238985,0.067590537,0.157174626,0.010016978,0.013735591,0.014161964,0.050502402,0.046414791,0.006318732,0.025287566,0.026347112,1.694000013,0.430008261,7.348175471,0.819184728,0.461386182,0.207173772,1.783162802,0.443751927,0.094042712,0.215460042,0.084279387,0.077273916,0.076313453,0.167008296,0.5651626,0.033977459,0.078874614,0.044055757,0.05815476,0.070238948,0.032561935,0.066919641,0.037089377,0.012537957,0.010454354,0.008079658,0.084311343,0.019764304,0.030194943,0.008580584
E07000107,2014,0.555945725,0.617990029,0.609762213,0.316392999,0.191776186,0.16238968,0.612098946,1.4135851,0.306073138,0.376528216,0.193799036,0.347448407,0.39241455,0.796192714,0.814844189,0.252981121,0.833094446,0.018887181,0.126168792,0.929289252,1.039413884,0.714425022,1.06753099,0.307889756,0.474998186,0.394876052,0.135207294,0.860683432,0.080075978,2.177143566,0.067177636,0.2505799,0.206245826,0.992790471,0.679465921,0.203765001,1.537027955,0.426232801,0.292520512,0.091826331,0.288447779,0.103581037,0.333460435,0.734688903,0.355561456,0.233587951,0.307356093,0.474310665,0.159716321,0.480663822,0.177576966,0.622737421,0.024878415,0.730632472,0.14578123,0.231072279,0.123219254,0.062282539,0.228631929,0.124370633,0.068933794,0.202012471,0.287430272,0.058106358,0.168262212,0.051065078,0.06444156,0.167977167,0.009572613,0.011391867,0.012962507,0.048009036,0.044516306,0.005555507,0.027996924,0.025735729,1.700859839,0.458030257,7.502576813,0.866427642,0.509416161,0.209018139,1.953307383,0.513840181,0.093869519,0.236700439,0.08975096,0.071309241,0.080467697,0.169510285,0.590110202,0.039337949,0.090900952,0.049482112,0.065337592,0.078310955,0.031770337,0.07337614,0.036734132,0.013450108,0.012307577,0.009257365,0.072142729,0.019357301,0.033221098,0.011168994
E07000108,2014,0.571441514,0.616978308,0.629269196,0.322996318,0.199223655,0.182343596,0.637446246,1.565772049,0.311438603,0.399156421,0.218445889,0.381274616,0.396713242,0.808180252,0.840136243,0.264967202,0.862733656,0.019404705,0.126620554,0.966912408,1.052242854,0.792472113,1.143574504,0.357434466,0.515696399,0.409194266,0.146977901,0.95260426,0.081430244,2.363586925,0.067527832,0.253372784,0.241217683,1.031644027,0.696595487,0.212636465,1.561462231,0.473431562,0.314209328,0.072357592,0.332411288,0.116840047,0.382871017,0.766704078,0.343258348,0.243319302,0.326298701,0.457886364,0.166390189,0.497355869,0.171160708,0.666822379,0.025029811,0.73007547,0.162456948,0.274603091,0.140467488,0.063323999,0.187972884,0.137372445,0.079646532,0.231875207,0.340729113,0.066871126,0.165850672,0.058102803,0.069266457,0.167934828,0.010538993,0.013964802,0.013429036,0.051784692,0.0487691,0.006619686,0.025445205,0.031120183,1.656120322,0.374863622,7.140129212,0.805075424,0.407796484,0.175833062,1.742391146,0.375455468,0.089564781,0.1829639,0.073326586,0.065225275,0.069259804,0.149488941,0.509023758,0.03538301,0.082217943,0.045965147,0.060569725,0.072758327,0.028444006,0.061311192,0.036582175,0.013622882,0.011065639,0.007663496,0.094807621,0.018588214,0.032083496,0.009437133
E07000109,2014,0.503339893,0.565614766,0.581168666,0.287057267,0.184984856,0.1589861,0.604777368,1.308057822,0.29328399,0.362251505,0.192562777,0.307805089,0.369989881,0.803487062,0.757442738,0.24021068,0.764951693,0.016409496,0.132138994,0.886020967,0.989554501,0.692124171,1.026964785,0.296978447,0.460829744,0.356270741,0.132154891,0.814938114,0.092799028,2.011271623,0.063811094,0.239752958,0.202573662,0.988657167,0.648978349,0.203853565,1.346837593,0.387762418,0.289600514,0.105525456,0.29361705,0.107276234,0.357206168,0.728128225,0.317277152,0.233713843,0.31054331,0.455246233,0.161111141,0.455847894,0.16964925,0.606904022,0.027196343,0.653602011,0.166178653,0.305939598,0.119103335,0.05957396,0.176561239,0.116589572,0.066529881,0.193191554,0.301167873,0.059694795,0.200814964,0.065528656,0.06429134,0.150035353,0.009060425,0.014915079,0.018380257,0.043358439,0.048986472,0.005390622,0.02453095,0.025302466,1.479656287,0.37753395,6.554256271,0.71353289,0.420136789,0.188423647,1.735486882,0.478792421,0.087792434,0.182540186,0.077117609,0.069125705,0.074710545,0.134218392,0.520988833,0.039390118,0.091033769,0.050010129,0.066027304,0.079138193,0.032546517,0.061993886,0.02980105,0.009921826,0.012259233,0.007316817,0.071158618,0.017268058,0.026826658,0.007073325
E07000110,2014,0.565670073,0.619603758,0.617587476,0.314358849,0.199202391,0.173014514,0.63265698,1.454588171,0.310719489,0.388920036,0.206921506,0.356927112,0.398828752,0.807994064,0.814293023,0.260707547,0.846186796,0.018600599,0.129830466,0.945304148,1.046747422,0.744248432,1.09558557,0.328558064,0.497806191,0.399687286,0.144072622,0.909761359,0.083405556,2.222427065,0.065715582,0.251901322,0.219694083,1.019068814,0.687254258,0.210243206,1.545002844,0.446342858,0.301891539,0.090371123,0.312768836,0.11164988,0.365586567,0.766725877,0.344202699,0.241557476,0.326198373,0.474589957,0.163507775,0.494172887,0.175384131,0.639950854,0.025693549,0.727593415,0.154899667,0.273228227,0.132135559,0.062582154,0.208728876,0.129784926,0.074335837,0.213465816,0.299388917,0.062676143,0.174587112,0.058020306,0.067812939,0.168248078,0.010279735,0.013843382,0.013813168,0.048793156,0.048597734,0.005937331,0.026216507,0.028646696,1.676078132,0.418219623,7.297977344,0.838829209,0.468605541,0.193883722,1.856402875,0.467642974,0.091399477,0.213881112,0.081991967,0.079537357,0.074965652,0.157542538,0.563127776,0.038292158,0.087791156,0.048801422,0.064340133,0.077241224,0.030780928,0.06593555,0.037574949,0.012325107,0.011973756,0.008364899,0.080008865,0.019695727,0.031978282,0.01040909
E07000111,2014,0.59140539,0.632019737,0.634340107,0.318850164,0.207291176,0.180989612,0.656283433,1.434978223,0.316464306,0.405997322,0.218180343,0.379716438,0.410383588,0.808682947,0.856430794,0.270969856,0.88067614,0.02084878,0.128617589,0.980264589,1.08003825,0.790755425,1.14132209,0.348061609,0.519096336,0.417041149,0.150038765,0.945778992,0.082590093,2.346109801,0.068029179,0.26133268,0.230272041,1.043305973,0.704823865,0.21431625,1.624447585,0.467703887,0.310192833,0.074010465,0.330730685,0.114190136,0.377230057,0.758960231,0.358266326,0.246639277,0.334568216,0.481146534,0.165904521,0.508979678,0.176934275,0.670999801,0.02410293,0.737294818,0.158685633,0.269923509,0.138829764,0.062132189,0.210907111,0.138006717,0.075880698,0.227105378,0.295579869,0.066955273,0.163677222,0.055099157,0.069624524,0.168178983,0.010471776,0.014700954,0.013652345,0.051270654,0.049041356,0.006465871,0.026539938,0.028505196,1.664581494,0.399414309,7.439476986,0.862150329,0.441871642,0.179643671,1.76622692,0.43703695,0.090439952,0.205954045,0.078695078,0.075091812,0.070978527,0.14749884,0.536428607,0.038248347,0.088289794,0.049095602,0.064987277,0.077815928,0.029932089,0.065190019,0.041017283,0.012570068,0.011995186,0.00799276,0.087529671,0.019422983,0.033013548,0.008735402
E07000112,2014,0.56971372,0.60882465,0.624524261,0.314302389,0.207566445,0.181349172,0.646998908,1.504418737,0.31070218,0.393887433,0.210241021,0.365202387,0.40495767,0.79951898,0.817598185,0.262743654,0.847697944,0.01786333,0.128453766,0.955301274,1.035017551,0.761459234,1.107160486,0.340575823,0.510319847,0.388267198,0.154848294,0.912038113,0.086402556,2.244019709,0.062681926,0.25246263,0.229721378,1.024903551,0.670183718,0.216497446,1.561004724,0.446619107,0.30798131,0.089639516,0.313664524,0.112839571,0.387830564,0.79996662,0.330965022,0.249128039,0.332115289,0.462816507,0.170430433,0.502363177,0.163568633,0.657013492,0.026413361,0.720217234,0.15923159,0.287304756,0.137771392,0.065735918,0.193810067,0.136380547,0.076545596,0.224152804,0.300869134,0.067420927,0.174146514,0.05990004,0.071561548,0.165216698,0.010466491,0.013596781,0.015301541,0.050292133,0.049881776,0.006654978,0.026291682,0.036023457,1.672448471,0.382925939,7.358131286,0.842010716,0.441172402,0.186292874,1.817172345,0.409343093,0.091465132,0.197416466,0.077094148,0.075640226,0.073108075,0.157837024,0.539126038,0.034736461,0.079751175,0.044681759,0.058610239,0.070497328,0.030172598,0.065162848,0.035541704,0.012444896,0.010792431,0.008606342,0.076341543,0.018241248,0.032447522,0.011519827
E07000113,2014,0.562753064,0.611099421,0.616602009,0.313247718,0.191410034,0.171529438,0.618949906,1.479797777,0.310549025,0.387520335,0.206743329,0.360020217,0.390907751,0.81017368,0.826254708,0.257005609,0.844039639,0.01849764,0.125805248,0.946541463,1.039734107,0.746205521,1.100188787,0.332182286,0.497749677,0.399192097,0.143368364,0.902566696,0.080459539,2.244655419,0.065645162,0.249449029,0.220739565,1.008636719,0.688596565,0.205644655,1.550133197,0.445627172,0.300399528,0.086011904,0.309289602,0.109291379,0.355142458,0.762186159,0.347922413,0.234713352,0.318153998,0.46177558,0.162692938,0.488156377,0.171764683,0.640879047,0.024667144,0.73067024,0.152533018,0.259439457,0.13104936,0.062070408,0.208041204,0.131043771,0.071776249,0.214591094,0.306722275,0.06282575,0.163974085,0.053354894,0.066242252,0.169124371,0.010490352,0.012553697,0.012933401,0.04874924,0.048164723,0.006246269,0.027926098,0.028026559,1.642050005,0.395112382,7.165261352,0.824825869,0.450058377,0.191378274,1.807328998,0.445615433,0.089860103,0.199343994,0.07894398,0.068635667,0.075036608,0.153624086,0.535879467,0.039370821,0.090623574,0.050155512,0.066306334,0.079424801,0.029881049,0.066643265,0.037355464,0.013046868,0.012258376,0.008186763,0.079069676,0.019103607,0.031375659,0.00919461
E07000114,2014,0.53561794,0.587220524,0.606420733,0.310517269,0.189496259,0.174852966,0.612822392,1.522907737,0.30878955,0.387558125,0.215112527,0.355740335,0.375670271,0.80504502,0.823919195,0.254861229,0.82373993,0.017135416,0.126022911,0.944849682,1.019583081,0.769566211,1.117892785,0.345522676,0.496720403,0.390468834,0.138431377,0.907530776,0.080840793,2.27650864,0.067782172,0.244525504,0.23063882,1.006007658,0.684743941,0.210436043,1.418177925,0.448483425,0.304724046,0.082641057,0.324048316,0.115813481,0.368175305,0.757414108,0.328138901,0.235639925,0.315395357,0.442631379,0.161259566,0.480091933,0.16767769,0.656518791,0.024805013,0.684925231,0.168682977,0.284967917,0.133645309,0.05916653,0.155525001,0.128873132,0.076192782,0.22253264,0.350838427,0.065777284,0.16893621,0.059906122,0.067019829,0.161448908,0.010835878,0.012212497,0.013966801,0.049035082,0.048164243,0.006063405,0.025208634,0.029663728,1.48535083,0.340068934,6.526758067,0.688882477,0.35940416,0.16989346,1.638168866,0.346679693,0.086647978,0.15792832,0.067818138,0.051226162,0.065988955,0.135014702,0.464134778,0.037347326,0.085785996,0.047579344,0.062841968,0.07547471,0.026131332,0.056106472,0.029313903,0.011956532,0.011621447,0.006827791,0.099994432,0.017379829,0.028720472,0.00849912
E07000115,2014,0.587550449,0.637021184,0.629599223,0.315974604,0.20444344,0.177644943,0.646908256,1.439980358,0.318735611,0.399984857,0.210852021,0.371981003,0.411927455,0.803399202,0.841879811,0.270368608,0.880046759,0.019162387,0.127016748,0.971309187,1.075978623,0.765324387,1.115397705,0.335143759,0.512947004,0.412324841,0.147600467,0.921905456,0.079853498,2.285063177,0.06713163,0.259199078,0.22137421,1.028984959,0.702080103,0.212443451,1.613860747,0.457092422,0.303615196,0.0811806,0.312662147,0.11006617,0.361817042,0.768209866,0.359581624,0.245023076,0.329685797,0.482173501,0.163909023,0.506324271,0.175243938,0.652719747,0.025073303,0.748347855,0.151298721,0.252168151,0.135272395,0.064150068,0.225467113,0.132722422,0.071268822,0.219252768,0.284090557,0.063888107,0.162322406,0.0532599,0.068667383,0.172092314,0.010342207,0.013951197,0.013247917,0.050098862,0.04757683,0.006154463,0.027325134,0.032040534,1.697346201,0.41045336,7.55437339,0.885179615,0.47629457,0.194931948,1.87222109,0.445330818,0.094864335,0.216221894,0.083383364,0.079785776,0.075496671,0.158890068,0.566237274,0.041430862,0.09577957,0.053736861,0.070576552,0.085118516,0.031819607,0.068374852,0.041899194,0.011311044,0.012627937,0.009181275,0.065097963,0.020122867,0.035797635,0.010477136
E07000116,2014,0.568771157,0.620618224,0.620023764,0.302162287,0.208410961,0.174013928,0.652928312,1.390516277,0.307757991,0.393860632,0.204551232,0.355846048,0.410165743,0.799667629,0.818118354,0.258890032,0.844359925,0.021024897,0.131705679,0.940243328,1.054219929,0.744979795,1.089468304,0.321801151,0.495685848,0.39709931,0.148201412,0.885512431,0.088007968,2.208051808,0.066743851,0.25428128,0.216082223,1.02332079,0.678373084,0.211632526,1.562347979,0.434360806,0.299828102,0.083589731,0.313245629,0.109653288,0.371369444,0.733367637,0.347410643,0.243666366,0.328906814,0.483301079,0.16469572,0.49434816,0.174836897,0.637966968,0.024792565,0.712416337,0.159394874,0.263355728,0.131011333,0.062233602,0.209734366,0.130568489,0.072932246,0.213361655,0.282533773,0.06362015,0.176300533,0.055951705,0.067994769,0.161409966,0.009332304,0.015978481,0.015839516,0.049125606,0.047006346,0.006045271,0.026038889,0.02598255,1.677277888,0.421884372,7.475730323,0.869871804,0.475152982,0.189652635,1.820915962,0.494981286,0.092100189,0.231927815,0.085058724,0.092988603,0.074077577,0.153975598,0.573510456,0.040400622,0.09276319,0.052366438,0.069268295,0.08319547,0.031402902,0.068034583,0.04006468,0.011711071,0.012477859,0.008550028,0.074479373,0.019464021,0.032167781,0.008906925
E07000117,2014,0.498873691,0.560188399,0.573122143,0.298046456,0.170979822,0.158782308,0.570180148,1.54192629,0.293781115,0.359367656,0.195869815,0.33399418,0.352122688,0.80393678,0.774750535,0.242987399,0.776697657,0.016459284,0.122022143,0.887886929,0.973401998,0.715842936,1.056752834,0.320062515,0.455377169,0.37531348,0.127726129,0.853223174,0.077029187,2.141046383,0.066803561,0.232211152,0.215381308,0.951075244,0.664282471,0.195634171,1.334431741,0.41874853,0.288293694,0.091193946,0.30472497,0.107514865,0.337401301,0.705409352,0.32763857,0.21607133,0.287456688,0.429102999,0.151267152,0.445496235,0.165485958,0.60647088,0.024666615,0.664764173,0.163950345,0.26515698,0.12058912,0.056883658,0.159542338,0.113853407,0.069357485,0.204225808,0.360928522,0.05643151,0.16512603,0.057257448,0.059779292,0.161658008,0.009607362,0.012297196,0.013497575,0.044923278,0.042838109,0.005758772,0.024627741,0.026854976,1.517357765,0.347365578,6.27717504,0.679945749,0.378361943,0.179955819,1.704153041,0.390873023,0.085801042,0.168562947,0.070824167,0.053226467,0.068210806,0.137611093,0.475690428,0.036971815,0.084047714,0.046549308,0.061371546,0.073322986,0.025568,0.058928595,0.030377419,0.013368087,0.011543714,0.00625814,0.10931566,0.018082984,0.026578514,0.007447685
E07000118,2014,0.556090613,0.614997356,0.609768165,0.31166844,0.1885053,0.171970424,0.611311805,1.554437001,0.308681184,0.385300451,0.207236708,0.366939678,0.388787569,0.812704362,0.829681935,0.258565973,0.846316056,0.017859071,0.124686057,0.949012722,1.039265419,0.753605119,1.107679389,0.337928165,0.493893165,0.405148374,0.142487808,0.914920239,0.076621746,2.265615117,0.066278444,0.247352394,0.224584668,0.99996047,0.6934391,0.205456138,1.529037486,0.453810784,0.298200652,0.076854108,0.315465264,0.110626195,0.352219376,0.766731123,0.346751614,0.231822802,0.31183065,0.454960927,0.159738119,0.485924443,0.170210746,0.641946023,0.024009664,0.737497213,0.151723872,0.2511722,0.129965494,0.061454426,0.198885356,0.127856961,0.073996388,0.216174502,0.321159492,0.061592926,0.160827927,0.054292855,0.064334704,0.17332415,0.010484834,0.011577063,0.012191612,0.048812551,0.045353459,0.006108942,0.027169225,0.029488632,1.6615805,0.387028503,7.07594036,0.799355674,0.439945015,0.189730822,1.821136258,0.410255893,0.090437553,0.197414198,0.079062152,0.066337517,0.073407834,0.159951687,0.538153112,0.035430469,0.082661858,0.045295981,0.05993338,0.071883831,0.027701088,0.063716002,0.036288137,0.014033668,0.01095071,0.008214793,0.093907161,0.019316029,0.031594208,0.010571935
E07000119,2014,0.605967486,0.635723107,0.647371566,0.317473553,0.217275612,0.18663748,0.660888199,1.434019869,0.313681946,0.410389388,0.220978415,0.392651954,0.4191821,0.780837453,0.85597931,0.270190039,0.88556929,0.020041117,0.126873807,0.988587949,1.060904762,0.800721185,1.143270829,0.352411926,0.540414205,0.413617792,0.159123372,0.956749458,0.080824294,2.384497897,0.062152429,0.259233789,0.239302044,1.031818132,0.686425137,0.216824438,1.74077893,0.47534708,0.312588039,0.059240116,0.324098825,0.114702775,0.389771048,0.817722358,0.3438605,0.254279409,0.346828595,0.464179604,0.171169683,0.528523676,0.164381823,0.689416844,0.02412598,0.748797701,0.145708054,0.274980384,0.147815589,0.064926642,0.221534184,0.150233588,0.078478424,0.236091094,0.275475714,0.072645024,0.154261553,0.053119338,0.074120401,0.167505549,0.011555541,0.014745456,0.012732311,0.052436164,0.053977881,0.007035752,0.027539043,0.04045796,1.714148015,0.402427103,7.822201677,0.952675549,0.450496064,0.175280953,1.731676085,0.424479466,0.088799543,0.201397867,0.076148057,0.081263703,0.071435183,0.155678967,0.530559689,0.031381659,0.073964678,0.040744367,0.054182913,0.064874047,0.031181836,0.06698449,0.040474431,0.014871901,0.009642283,0.007990499,0.074254983,0.017961664,0.033467768,0.010362542
E07000120,2014,0.469771184,0.541119696,0.563909962,0.273972261,0.177209795,0.157700235,0.581241236,1.350715775,0.287028231,0.346491843,0.187603351,0.305017642,0.353600193,0.791159511,0.740920403,0.237011663,0.737255882,0.015083828,0.12926616,0.85699975,0.9469987,0.685020349,1.016168531,0.299252993,0.438889282,0.344719168,0.126554838,0.793325017,0.088956444,1.979195527,0.06457705,0.232612879,0.204368918,0.957946412,0.63532636,0.201746505,1.232754049,0.379074497,0.286812876,0.102787367,0.299871078,0.10484264,0.350747518,0.69767717,0.305612275,0.226759351,0.295563353,0.429474785,0.155517288,0.434617255,0.16276353,0.589755414,0.026653257,0.627205128,0.172048771,0.301717314,0.117506764,0.0589715,0.145371779,0.107489083,0.064236994,0.192453494,0.332697405,0.056407696,0.190943575,0.064221897,0.060867581,0.146976143,0.008646607,0.013964612,0.018954756,0.043033018,0.043718612,0.00540689,0.022188698,0.025993275,1.379085424,0.32233988,6.005747793,0.617223302,0.358716892,0.170563568,1.650628471,0.399536868,0.08565703,0.15488909,0.06805,0.052597556,0.065232955,0.121430441,0.474517555,0.038300395,0.087305066,0.048460606,0.063568188,0.076386327,0.027311851,0.055228331,0.026281606,0.00882519,0.011921132,0.006509053,0.087446492,0.016817169,0.025161509,0.00734137
E07000121,2014,0.53520232,0.58954412,0.598588178,0.305416108,0.188577095,0.169586266,0.603772616,1.526344577,0.300760113,0.378756235,0.207552176,0.356488582,0.376366797,0.802362199,0.811955041,0.25518941,0.821581776,0.017832851,0.123750601,0.930394724,1.011017074,0.751980448,1.095685833,0.333638355,0.483062337,0.394516613,0.135491787,0.896767168,0.076663708,2.247810879,0.066332878,0.243014433,0.223567968,0.981526798,0.680139433,0.203223668,1.455546637,0.447031939,0.296060001,0.074070112,0.314376586,0.109904932,0.348942108,0.74931557,0.336959882,0.229575027,0.307537033,0.442294403,0.155819707,0.475618346,0.166398943,0.639448759,0.024542333,0.696556798,0.155397772,0.258892903,0.128414959,0.058812188,0.176614475,0.125282327,0.07512441,0.216644522,0.33986387,0.062561353,0.157883924,0.055902357,0.064588311,0.165600864,0.010195423,0.012566718,0.012728836,0.048731753,0.04515792,0.005711574,0.025973513,0.02973603,1.644668344,0.382473467,6.962991139,0.762988979,0.418213112,0.193143868,1.762077312,0.399021891,0.089469807,0.193569921,0.078081834,0.064952287,0.072131139,0.158223013,0.526119386,0.034091712,0.079043505,0.043821703,0.05801216,0.069654881,0.028344203,0.063549164,0.035378545,0.012768272,0.010494536,0.007528264,0.100300023,0.019050392,0.02981155,0.010407826
E07000122,2014,0.47295142,0.535735543,0.562056918,0.281984395,0.181340982,0.159957978,0.588721901,1.354311358,0.288005778,0.346524104,0.187090211,0.30401141,0.353074782,0.773267629,0.72374555,0.236796609,0.731284455,0.015159896,0.127229788,0.844052977,0.946723395,0.682411082,1.00518603,0.298034926,0.436695364,0.333742938,0.128736996,0.777006299,0.090464883,1.951215456,0.062936343,0.231169779,0.206823062,0.949706886,0.622117811,0.204194753,1.218378117,0.376073281,0.284741613,0.110008669,0.28534248,0.105252241,0.347200717,0.67478393,0.294975169,0.228413511,0.295419513,0.426943943,0.156349703,0.433546673,0.161997959,0.583600271,0.027126235,0.615549346,0.178571901,0.299669815,0.11796916,0.060289905,0.142208319,0.10726745,0.065354564,0.194129638,0.336255813,0.05644976,0.185450664,0.066883908,0.06216892,0.139607336,0.00853936,0.01458894,0.019127878,0.043146839,0.043066284,0.005229572,0.020752885,0.024259391,1.392003331,0.317833866,6.040609637,0.612955438,0.358433625,0.168163361,1.663041238,0.364977429,0.086240047,0.159907713,0.0679109,0.055751904,0.065432558,0.125417969,0.479937622,0.038340166,0.088894373,0.048569563,0.064558312,0.077337411,0.027291704,0.054488317,0.027023332,0.00946408,0.012084443,0.007015166,0.081337896,0.016490384,0.026443124,0.008338249
E07000123,2014,0.449713102,0.526200894,0.543566062,0.269352155,0.169362669,0.14842647,0.559632645,1.399180062,0.282963927,0.333037599,0.180590358,0.288458488,0.340168826,0.784780757,0.717557539,0.229916633,0.713132236,0.014367623,0.126762786,0.832318201,0.929287053,0.658392877,0.989873031,0.283022972,0.418794521,0.333658114,0.118629272,0.748315589,0.084686556,1.900967605,0.063072171,0.223530244,0.192943157,0.922513831,0.623464139,0.195748887,1.166440388,0.363410953,0.274786399,0.105727067,0.277161645,0.100597562,0.32396514,0.666108203,0.302456949,0.21606698,0.280060592,0.417582335,0.148881053,0.415717116,0.160651713,0.564250276,0.02667136,0.619930747,0.169667156,0.269752934,0.108054186,0.055835166,0.141795206,0.099667107,0.061355332,0.182364664,0.349369713,0.052960295,0.185832738,0.062377394,0.05696501,0.144427358,0.008051141,0.013190824,0.018310334,0.040895693,0.040351294,0.00491545,0.023044933,0.022957046,1.479108887,0.354092779,6.088538604,0.607505924,0.384474733,0.193413145,1.730125941,0.415043909,0.091159724,0.175172519,0.077036132,0.054761114,0.071246708,0.139501399,0.51449847,0.0369261,0.085031216,0.04668608,0.061535254,0.073697574,0.029243884,0.060333033,0.027043023,0.009205705,0.011605435,0.007239567,0.082856019,0.017665069,0.024725953,0.007910099
E07000124,2014,0.589757097,0.629840183,0.637298342,0.316130965,0.204178108,0.182908668,0.64864752,1.459883173,0.317134826,0.40202567,0.220062346,0.386613761,0.406129498,0.806243595,0.850978769,0.270929112,0.877820838,0.020647377,0.12720207,0.983705714,1.070283454,0.800075587,1.150948348,0.355135242,0.523786227,0.417179568,0.151945105,0.959707794,0.082927186,2.369580466,0.064682014,0.257703409,0.239606913,1.051070094,0.706733389,0.21194642,1.639476989,0.479816591,0.310780121,0.065936366,0.337881345,0.11509802,0.382775461,0.770230152,0.353443326,0.245940995,0.332195246,0.473213021,0.167237293,0.508510738,0.17201206,0.678532978,0.024512659,0.74123241,0.155818588,0.278141098,0.140962893,0.064024187,0.210090979,0.137841443,0.076293098,0.23241844,0.303580896,0.06720928,0.164565311,0.055348439,0.069031637,0.167428875,0.011157867,0.013839824,0.013369609,0.052693884,0.04888206,0.006759788,0.025859888,0.02937411,1.673605191,0.378279148,7.296340342,0.841656834,0.424262463,0.17143743,1.713462268,0.410877873,0.087019016,0.194116841,0.074349503,0.074703754,0.068792335,0.14253325,0.521421123,0.03714258,0.086872975,0.048793964,0.064226404,0.078256732,0.030421831,0.063633516,0.040696307,0.012303312,0.011376524,0.007517036,0.092469116,0.019113685,0.032272782,0.008459315
E07000125,2014,0.534570437,0.596651239,0.593921679,0.307210251,0.177970565,0.167124805,0.587902264,1.602419017,0.304681193,0.380152057,0.206558712,0.360531277,0.369619744,0.821817597,0.823710994,0.25262672,0.825914708,0.017814236,0.125248013,0.938100066,1.023874244,0.749265416,1.114773278,0.340931188,0.478224677,0.411558899,0.134928074,0.925393224,0.074697432,2.284271897,0.068856953,0.241222925,0.223353924,0.990800154,0.701479084,0.19816274,1.442256194,0.453257522,0.294665003,0.080847312,0.324327852,0.110672234,0.346895547,0.725318465,0.353633691,0.219709553,0.296850188,0.452492855,0.156042763,0.470052416,0.171177815,0.626218479,0.023210887,0.728702292,0.154684122,0.249080579,0.123439503,0.057845845,0.179582838,0.122020791,0.070354625,0.2128649,0.350718798,0.058025,0.157589242,0.052843193,0.060593631,0.173056383,0.009733847,0.011987862,0.01134891,0.04683294,0.044100092,0.006700779,0.027027367,0.028926011,1.58136348,0.353027261,6.62527612,0.753351516,0.400313841,0.186431933,1.759474507,0.407844988,0.091148996,0.186801566,0.07555655,0.056374729,0.070025199,0.148439016,0.519180448,0.037010094,0.084799679,0.047211589,0.062033283,0.074732182,0.025433191,0.061699237,0.032546643,0.014083005,0.011633136,0.006979893,0.094613421,0.018430994,0.029829391,0.008623551
E07000126,2014,0.557453912,0.607611586,0.610998368,0.307927535,0.190593992,0.17295374,0.617447765,1.477132253,0.307479564,0.385130331,0.20718218,0.360229852,0.388861165,0.81282607,0.820627736,0.256565455,0.84123276,0.0179217,0.126786413,0.944358886,1.031869661,0.748701655,1.10334192,0.333122638,0.495896968,0.402385163,0.141853668,0.907715335,0.079504466,2.251692722,0.066634489,0.246616319,0.222207887,1.006756944,0.690392562,0.205277002,1.542239776,0.449092814,0.298319927,0.083357522,0.318890117,0.110949783,0.35760833,0.774679002,0.34574275,0.232516084,0.312241767,0.458340659,0.161088838,0.485565343,0.170113367,0.642063667,0.024202485,0.722010207,0.152436172,0.259204687,0.128832269,0.061531586,0.197032698,0.128250291,0.074359802,0.217184202,0.31532756,0.06272047,0.163009093,0.054173374,0.065319704,0.171039526,0.010391598,0.013876332,0.012376133,0.049521963,0.04692984,0.006049217,0.026852311,0.029237965,1.645406213,0.397426001,7.10147426,0.808599256,0.439059507,0.188171968,1.781447775,0.432366337,0.087884048,0.195790538,0.077793587,0.074661048,0.07308973,0.153299935,0.528112843,0.035131908,0.0810877,0.045029682,0.059875688,0.071589766,0.031627303,0.0637239,0.04068521,0.012890792,0.010943569,0.007676201,0.097946451,0.0193504,0.02974764,0.009374458
E07000127,2014,0.556987603,0.606524623,0.616167724,0.309002401,0.190553215,0.173870305,0.617537356,1.493690426,0.30825952,0.385003201,0.211501798,0.365393153,0.385654698,0.808525266,0.829377456,0.260291686,0.840778241,0.018533268,0.12536908,0.950197673,1.034698141,0.765529171,1.11649781,0.341562057,0.499237817,0.400795789,0.141840596,0.922560606,0.080088139,2.281451587,0.065391795,0.246747403,0.228919503,1.016617319,0.695056309,0.204550502,1.543684857,0.457759347,0.301980427,0.073299419,0.323020748,0.111529949,0.362347308,0.763637657,0.342128094,0.234133034,0.31966948,0.4546524,0.160693463,0.485555217,0.167899799,0.652541964,0.024840681,0.727155376,0.152859188,0.27045347,0.13317709,0.061800646,0.199718898,0.130959264,0.075364651,0.2205546,0.325628507,0.063788383,0.161320671,0.055200096,0.065389912,0.16877015,0.010737039,0.012977853,0.012943879,0.049219179,0.047000872,0.006042588,0.026447505,0.027972786,1.636419353,0.388230112,6.983530546,0.788001083,0.417705135,0.184383715,1.722210333,0.411273887,0.088153762,0.18518259,0.073941899,0.066340459,0.070547059,0.150660547,0.513757454,0.035350462,0.082182314,0.045914223,0.060293546,0.072874421,0.029535964,0.063633365,0.036441644,0.012861471,0.010823349,0.007212439,0.095329744,0.01866176,0.029409339,0.00856021
E07000128,2014,0.584859967,0.617327561,0.632296635,0.321873548,0.202874343,0.182820983,0.632716266,1.491669888,0.315307926,0.400952679,0.222878865,0.383760138,0.396520696,0.796312369,0.853377664,0.268407678,0.865860393,0.017816871,0.123606234,0.994258194,1.045628814,0.803877336,1.145997881,0.35733622,0.529800608,0.415376184,0.149552965,0.950111759,0.079177334,2.378978001,0.0639078,0.253912105,0.240508436,1.019276985,0.700729683,0.214576715,1.640706706,0.477989185,0.311275276,0.067009691,0.333622469,0.116287159,0.37886714,0.825326808,0.337402158,0.248067004,0.333941085,0.448547967,0.165866947,0.515234738,0.161253622,0.687519601,0.024663247,0.743316493,0.151532021,0.281471208,0.144231687,0.062826037,0.191473462,0.143241424,0.086188153,0.234153292,0.309957647,0.071741623,0.154706513,0.054497516,0.072772615,0.170870969,0.012259875,0.012524718,0.012789384,0.052415801,0.051663444,0.006816166,0.026849222,0.037643695,1.647144549,0.36769346,7.324296748,0.824972369,0.408549454,0.174276397,1.68938644,0.385549746,0.085787977,0.175494993,0.071221633,0.066222521,0.069697229,0.1514317,0.488030847,0.031517122,0.072983838,0.040672437,0.053912284,0.064784486,0.02901395,0.0602623,0.034382341,0.013800797,0.009788137,0.007283618,0.103436782,0.018892201,0.032271066,0.01015497
E07000129,2014,0.574252408,0.61975147,0.62683193,0.310559126,0.200742671,0.17442694,0.642875082,1.361981136,0.312261904,0.389043824,0.208171525,0.35994981,0.403153912,0.807389166,0.822825719,0.260478843,0.846570057,0.018945937,0.129690606,0.95702876,1.048939995,0.751209083,1.099541907,0.327358554,0.504304776,0.397078877,0.147202813,0.896186706,0.087371249,2.231576946,0.06456446,0.255388175,0.221480411,1.032038741,0.686877108,0.210355452,1.586956074,0.442844204,0.303786246,0.090777754,0.313962509,0.110340122,0.375860787,0.778483346,0.346615932,0.243533713,0.330047663,0.477117511,0.168662066,0.500761078,0.170258468,0.651605121,0.025614012,0.731538888,0.154107497,0.279842198,0.133699322,0.064053332,0.223252817,0.132127912,0.072234422,0.214571164,0.283127757,0.064629128,0.175352706,0.055895483,0.069246023,0.165247565,0.010432122,0.014869815,0.015333041,0.04940161,0.049152011,0.006397149,0.026029559,0.028335931,1.662313496,0.401922483,7.369005628,0.857084692,0.459860055,0.186206863,1.789884612,0.476776378,0.089088905,0.203888354,0.078850764,0.081129964,0.073569734,0.146449368,0.53699036,0.036353389,0.083177472,0.046569226,0.061153003,0.073564528,0.033282258,0.067461534,0.037384034,0.011909002,0.011276689,0.007820022,0.077562118,0.018963032,0.031264429,0.008619029
E07000130,2014,0.521683177,0.583014086,0.599161663,0.288883148,0.191570825,0.164053724,0.619785591,1.371778259,0.299222786,0.361208053,0.194772929,0.324989265,0.384086765,0.79937972,0.773090335,0.246419563,0.781481914,0.017082913,0.13236443,0.900252255,0.997054102,0.705093058,1.046926239,0.304124406,0.466943308,0.363983765,0.139843085,0.825844935,0.094303092,2.056404601,0.06094369,0.243194337,0.210974178,1.003343277,0.652117924,0.206712301,1.419529746,0.399497005,0.293467228,0.099258263,0.296316894,0.106750323,0.372204121,0.756442502,0.319791764,0.239147844,0.31921376,0.458635492,0.166239502,0.467829218,0.163478333,0.623611139,0.02814706,0.681068448,0.158754392,0.292963946,0.124580191,0.063732997,0.193448789,0.121350415,0.069918516,0.199563402,0.292100754,0.061067536,0.193752143,0.062521173,0.065891201,0.153784931,0.009836411,0.014406934,0.019225813,0.046040464,0.046401748,0.006135688,0.02440888,0.025291971,1.613296726,0.407417904,7.001154482,0.774005159,0.449812229,0.195245922,1.766000152,0.498491269,0.089721246,0.20194809,0.081247308,0.075684098,0.074661498,0.149769598,0.55026352,0.033770402,0.077435864,0.043045244,0.056900604,0.068497608,0.032938618,0.066867957,0.032913744,0.011780923,0.01041504,0.007549579,0.073659949,0.019038449,0.026899316,0.008094441
E07000131,2014,0.588375644,0.628841483,0.631954078,0.308895834,0.200903109,0.179210796,0.646510312,1.415594117,0.318705231,0.401198155,0.215489761,0.367355922,0.403540872,0.821403137,0.844831448,0.262974267,0.865279041,0.019549731,0.131594702,0.973513336,1.06693206,0.771649974,1.127040379,0.337012068,0.518841231,0.415067727,0.149711539,0.923202407,0.084109751,2.305282511,0.066505377,0.254842556,0.225133512,1.047364043,0.708218267,0.209370137,1.641698996,0.459290582,0.302922417,0.085313003,0.326514014,0.115864218,0.374580309,0.794227776,0.349631542,0.242862174,0.332755548,0.480235471,0.16618643,0.508906621,0.171482682,0.668409895,0.024154543,0.75815286,0.157738074,0.271115892,0.136315949,0.062336183,0.221171076,0.134337952,0.071744908,0.222047917,0.29027947,0.067516512,0.172129451,0.052605087,0.069334084,0.168318365,0.011114866,0.015684859,0.012856255,0.050402772,0.050146504,0.006287187,0.027065555,0.028810075,1.675723718,0.40121553,7.390712577,0.863738146,0.45042833,0.182275123,1.72656193,0.458604637,0.087336342,0.19776829,0.076840188,0.089821555,0.072975872,0.147102217,0.521756779,0.038137107,0.088636475,0.049828004,0.065779696,0.079355355,0.03516775,0.065002159,0.038899013,0.012550653,0.011598965,0.007580337,0.076152876,0.019891238,0.03076612,0.007883886
E07000132,2014,0.572931917,0.625790177,0.626866916,0.32388932,0.194155724,0.178748238,0.628318824,1.602292279,0.314978219,0.398502425,0.217424464,0.380981542,0.394026254,0.831897157,0.84953272,0.266909561,0.869587196,0.018995728,0.127045916,0.979564292,1.064717148,0.790193684,1.1532477,0.35816783,0.510642079,0.417990487,0.144665417,0.964966115,0.077254281,2.370708158,0.068417219,0.251892965,0.237038347,1.02914584,0.715867352,0.210182969,1.580366782,0.478643083,0.308833495,0.077674961,0.332853942,0.114942228,0.365452822,0.789556617,0.356426263,0.236708212,0.318705009,0.462291312,0.162391141,0.498881502,0.173642393,0.66613133,0.024219763,0.743361219,0.157491811,0.268378596,0.136388212,0.063050041,0.195814423,0.132582914,0.077996287,0.229100224,0.348024068,0.064256541,0.159605841,0.055747677,0.06658314,0.176697289,0.010747143,0.012231876,0.012001925,0.051547664,0.046540287,0.006461374,0.027115918,0.029580312,1.715525868,0.379908208,7.193672575,0.822010239,0.425037475,0.185020752,1.822427955,0.3956619,0.090394993,0.193607205,0.076390967,0.06471222,0.071385221,0.160861036,0.52959005,0.034820969,0.080403833,0.045026394,0.059307452,0.071383878,0.028490084,0.063059833,0.038017238,0.015046433,0.01092719,0.007645516,0.10687699,0.019471375,0.031262262,0.010283056
E07000133,2014,0.555172414,0.62189057,0.618384563,0.315266874,0.191231175,0.178489073,0.620182194,1.558345465,0.31676804,0.394495637,0.215848127,0.369339041,0.391211582,0.818182445,0.847004674,0.261508052,0.857291915,0.017039601,0.125309678,0.973982196,1.049639126,0.782380185,1.14031921,0.349431648,0.5100814,0.409966849,0.142677051,0.933206278,0.077434056,2.325148683,0.065640711,0.249581832,0.230052987,1.013768706,0.708206649,0.210707628,1.531972604,0.46405002,0.303128996,0.073298991,0.324382414,0.115631343,0.358328682,0.784066893,0.34669982,0.237330522,0.32575686,0.455871779,0.160701052,0.493405614,0.171691584,0.65668319,0.023377077,0.749203928,0.15722988,0.261764207,0.136615163,0.061431114,0.185393403,0.130070994,0.075702904,0.224325251,0.342004955,0.06464075,0.15884463,0.055859825,0.066996657,0.175385829,0.010700494,0.011751996,0.012749885,0.04974278,0.047722003,0.006266501,0.026515465,0.033716321,1.641309626,0.381023477,7.03984748,0.778776437,0.412010849,0.181656857,1.749780244,0.376191356,0.091796443,0.179322653,0.075466735,0.064180441,0.073260091,0.160062018,0.515409909,0.034906974,0.080735898,0.044782608,0.059390984,0.071463993,0.028004241,0.060406054,0.034136734,0.013389552,0.01087018,0.007797339,0.098817788,0.019057339,0.031611276,0.009605575
E07000134,2014,0.552507093,0.613969057,0.618494485,0.299864811,0.190833311,0.172831851,0.623648986,1.417161987,0.308501165,0.384982623,0.207583166,0.360696045,0.392658426,0.803961357,0.828988513,0.255061862,0.838057857,0.01773282,0.127337044,0.949160578,1.037963394,0.756047954,1.103866881,0.332015752,0.498001503,0.398258108,0.144513578,0.903402755,0.083870454,2.234055892,0.064772961,0.249678543,0.222605969,1.019177568,0.686052472,0.2079424,1.538296388,0.441627276,0.301852832,0.074292107,0.317203962,0.1115354,0.366467032,0.766814026,0.341668325,0.238309883,0.326612107,0.462424813,0.164256796,0.489574601,0.169903452,0.646913043,0.024655568,0.736859244,0.150731146,0.271742742,0.130159245,0.062409666,0.203188404,0.132978354,0.072116731,0.213526863,0.302551099,0.064276225,0.171759118,0.055916917,0.066032448,0.168765438,0.010552743,0.013404988,0.014679272,0.047022286,0.049092593,0.006123818,0.026387655,0.031130139,1.602831741,0.390783252,7.008124366,0.806982981,0.427678741,0.17981233,1.723647399,0.455973073,0.089652624,0.183653362,0.075559227,0.06417482,0.072723911,0.145862766,0.522607746,0.0367492,0.085092891,0.047586025,0.062611999,0.075432862,0.029673493,0.063455256,0.035900067,0.013350046,0.01135639,0.007397861,0.080858606,0.018223002,0.030375152,0.00858905
E07000135,2014,0.517641815,0.577782167,0.603224492,0.27839421,0.195849653,0.166373546,0.632347181,1.283026322,0.302551588,0.364206089,0.196492048,0.32295487,0.386898461,0.808515718,0.778960418,0.247519522,0.777078865,0.014966273,0.13320815,0.914922278,0.996784234,0.716270429,1.054555106,0.309632076,0.477597722,0.359057525,0.143420399,0.826845221,0.10208703,2.041425248,0.060665999,0.24377548,0.21184874,1.018882458,0.650335688,0.214375933,1.353820678,0.39739073,0.300559021,0.09777945,0.307079563,0.110027884,0.388074447,0.792980402,0.31189956,0.248522679,0.330681905,0.452316168,0.169625005,0.472458177,0.160406984,0.637411845,0.028715112,0.648100962,0.163383811,0.344710443,0.12552893,0.065718114,0.176101015,0.125122059,0.068667596,0.200046574,0.278812045,0.062875566,0.214475729,0.069918979,0.068721726,0.151505867,0.010433477,0.015265925,0.022572404,0.044910397,0.049459926,0.006329069,0.022477862,0.029018108,1.370000965,0.347831403,6.509685072,0.688054394,0.395522884,0.170368743,1.655908319,0.462719973,0.085491555,0.166455973,0.07195419,0.062498389,0.070968828,0.122916649,0.489056935,0.036140228,0.08404258,0.046596373,0.061654381,0.073938959,0.029830106,0.057954231,0.031425682,0.00957595,0.011273675,0.006659928,0.059596233,0.017812924,0.02706058,0.006828931
E07000136,2014,0.53474768,0.592963402,0.599918318,0.316386034,0.180192858,0.170011638,0.590304368,1.564541007,0.309531761,0.382598024,0.212841488,0.358932355,0.365668005,0.828168158,0.835781274,0.260089528,0.833054059,0.016263311,0.124049449,0.955253456,1.019974804,0.770179578,1.13078947,0.346806649,0.491362405,0.406916069,0.131032748,0.919604404,0.075449589,2.311373659,0.068679422,0.242351333,0.226870228,0.991654292,0.705964435,0.203213924,1.454154227,0.459931971,0.300097112,0.088479141,0.331889792,0.112590708,0.344572273,0.784931948,0.346671435,0.224866563,0.302659227,0.441663777,0.156563053,0.476669565,0.169386289,0.656940872,0.023872117,0.715590341,0.158682237,0.26892074,0.127884318,0.058421815,0.165107973,0.126763251,0.076722898,0.220921166,0.368345885,0.062107035,0.153885128,0.055014991,0.063578457,0.173819403,0.011251598,0.011543725,0.011983254,0.049113418,0.045517785,0.005834131,0.027479611,0.031868663,1.570851298,0.347896378,6.633660949,0.709597132,0.375800202,0.183975525,1.732857187,0.384502021,0.08781941,0.170973566,0.072638269,0.051203351,0.067883176,0.14457961,0.490339677,0.03379671,0.077898723,0.042547232,0.056522734,0.067499146,0.025885975,0.059521541,0.033897444,0.012520836,0.010498704,0.006706292,0.117454473,0.019307611,0.027831915,0.009238331
E07000137,2014,0.60109135,0.631140836,0.65092542,0.332422515,0.20442862,0.19182846,0.647865577,1.590156424,0.323292958,0.409599181,0.232707899,0.400464047,0.403258763,0.811965133,0.875734241,0.274460888,0.888816199,0.018755399,0.126066717,1.009074892,1.063454916,0.83373229,1.184773154,0.37901712,0.546168392,0.420402744,0.156593685,0.999204917,0.079981108,2.45597471,0.064051004,0.256716581,0.255628837,1.05625051,0.715785486,0.216853428,1.70164394,0.501846567,0.321938344,0.06623294,0.349364892,0.121819283,0.398005878,0.869918304,0.339410799,0.251406597,0.343885912,0.448584456,0.170164429,0.523530179,0.162043841,0.712074548,0.024694808,0.767593056,0.153952581,0.297768717,0.15194914,0.065651953,0.19359937,0.149247002,0.088805678,0.248001131,0.340644324,0.07391605,0.155990254,0.055952358,0.073925736,0.171736897,0.012939047,0.012374396,0.012353068,0.05451563,0.053512153,0.007276612,0.027454433,0.036311296,1.684115105,0.351509187,7.32254773,0.838873118,0.379201908,0.163634956,1.64199047,0.341604572,0.084473381,0.165064585,0.066564868,0.064903789,0.065450819,0.148028892,0.467185971,0.030758121,0.070286073,0.039879181,0.052913061,0.063265341,0.02911768,0.056279487,0.035038014,0.014734405,0.009519676,0.006823232,0.104547691,0.0184701,0.031292994,0.009536805
E07000138,2014,0.486329544,0.562512376,0.571861601,0.284627294,0.17299722,0.151772201,0.5728778,1.47224318,0.287532442,0.343622439,0.184214566,0.314867471,0.359102745,0.798583696,0.749902478,0.236924802,0.758351753,0.015271663,0.126496372,0.863692471,0.956249528,0.670111755,1.019633584,0.292540317,0.439373487,0.356647297,0.124206361,0.800276471,0.082316773,2.0081566,0.062945182,0.229376139,0.200252423,0.945491224,0.641684258,0.195201149,1.307828419,0.390747331,0.283063125,0.096558429,0.280656975,0.100589379,0.326111478,0.73226679,0.320257619,0.219973343,0.290471245,0.434018398,0.15315885,0.443003379,0.16287805,0.587022594,0.02593488,0.66839493,0.153201427,0.257200334,0.112376788,0.058475509,0.174224589,0.109941106,0.066419519,0.188987647,0.334336185,0.055364808,0.178427716,0.058027083,0.059248113,0.160736373,0.009187583,0.010988378,0.014832697,0.042924503,0.042430742,0.005183804,0.025761289,0.025826942,1.625080019,0.429572737,6.80483272,0.728758324,0.462445551,0.220085526,1.839488598,0.499918574,0.093110203,0.211033115,0.08669927,0.064361901,0.080088672,0.16143586,0.572948479,0.031616122,0.072581358,0.039828097,0.053020433,0.062940957,0.031670094,0.069266347,0.030905127,0.012324811,0.010052439,0.008044972,0.091944577,0.019723982,0.026738068,0.009918187
E07000139,2014,0.579439482,0.630674424,0.634030415,0.322167551,0.199308408,0.18322789,0.637810435,1.535930428,0.318156524,0.404004104,0.222199785,0.382452258,0.400331385,0.823275599,0.864872716,0.270474908,0.880356922,0.018619771,0.127238379,0.993062401,1.071873775,0.802813661,1.15990445,0.358989097,0.523843597,0.421875626,0.148679847,0.962209669,0.078692929,2.388977339,0.06748144,0.257177735,0.235135329,1.040994347,0.719524263,0.212869563,1.619880254,0.48163303,0.309936955,0.070367153,0.33620294,0.116275055,0.370597324,0.805177479,0.355606608,0.243438811,0.329699496,0.464523843,0.164487008,0.510568125,0.173133974,0.681553666,0.024235837,0.760681988,0.155045212,0.272542383,0.140357352,0.062865732,0.196314189,0.137669085,0.08020754,0.232023494,0.324184946,0.067792605,0.157251873,0.055151809,0.068837846,0.175574054,0.011702867,0.012500698,0.012364625,0.051797213,0.049605949,0.006365994,0.027883716,0.034616383,1.665692119,0.372026728,7.256424398,0.823548506,0.415233022,0.178966391,1.75797952,0.389244315,0.089912509,0.183294039,0.074736772,0.067736724,0.070076768,0.153896572,0.514034947,0.035623098,0.082889807,0.046003927,0.061248462,0.073651301,0.028708837,0.061356054,0.03719329,0.013079043,0.011015668,0.007812127,0.091992133,0.019242248,0.032272931,0.009853821
E07000140,2014,0.576808562,0.623226999,0.629240024,0.325267016,0.19644795,0.181061075,0.627720908,1.521381124,0.315830388,0.395189013,0.219070491,0.377421597,0.391732949,0.805769215,0.846963203,0.266517321,0.86441248,0.017773915,0.123793858,0.976604934,1.044092083,0.791506746,1.143493477,0.354654805,0.520549981,0.408297958,0.145499574,0.942318773,0.078070783,2.348045847,0.063618391,0.251525693,0.238046841,1.020366036,0.703231881,0.211441982,1.614026083,0.474970352,0.311891557,0.073889618,0.329526708,0.114964567,0.371094286,0.821743397,0.343314545,0.242444797,0.327685505,0.451448077,0.164520198,0.501519521,0.167238565,0.678457127,0.024918066,0.745550073,0.153283344,0.281988686,0.142044965,0.063502516,0.19817434,0.137003651,0.082308249,0.231874173,0.326644704,0.067353476,0.155709098,0.055761819,0.069763286,0.170292766,0.012012334,0.01206398,0.012500149,0.051616257,0.049575726,0.00638384,0.026312409,0.035085972,1.64989679,0.376305701,7.178673076,0.809609326,0.411579262,0.17616623,1.72853867,0.391233032,0.087507624,0.179935314,0.071931783,0.063231971,0.069147998,0.151531898,0.501351148,0.033534513,0.077250018,0.04331143,0.057058034,0.068597661,0.029061595,0.058949499,0.037345509,0.013772799,0.010463466,0.007163111,0.089069383,0.019670667,0.030457565,0.009360607
E07000141,2014,0.576163479,0.626787959,0.631115924,0.314424919,0.19818763,0.178709899,0.635888324,1.491280119,0.314447296,0.396600507,0.215210347,0.377458655,0.403362184,0.814519435,0.847470765,0.266212357,0.869492421,0.01850033,0.127766986,0.979794693,1.056014459,0.777496048,1.132854646,0.348050415,0.517832978,0.413586524,0.150739792,0.94506353,0.080470515,2.323240398,0.065949466,0.254783573,0.230385381,1.034267823,0.701489055,0.211883575,1.607345874,0.464985656,0.307854105,0.0760101,0.326591606,0.113055482,0.373693824,0.791139137,0.351672409,0.242828813,0.33018155,0.466522609,0.167075315,0.506525988,0.170892575,0.664011822,0.024817273,0.749627161,0.151571631,0.27238228,0.137298131,0.063882631,0.205471083,0.137195071,0.075764828,0.224076527,0.302466681,0.065814175,0.163349042,0.054873163,0.068836165,0.176286194,0.011111386,0.013533923,0.013189295,0.050074971,0.049485922,0.006551577,0.027327911,0.033111735,1.65056082,0.38657313,7.260823504,0.844739712,0.436828492,0.180765379,1.7813059,0.428255623,0.090007475,0.191646363,0.076682571,0.070922554,0.071656934,0.151666065,0.529034846,0.036075367,0.083757477,0.046602837,0.061777949,0.07419659,0.029265913,0.063484361,0.037780961,0.013591649,0.011169148,0.007909205,0.08322963,0.019169235,0.031786967,0.009894554
E07000142,2014,0.578767419,0.626966872,0.634768116,0.321603284,0.19713841,0.183407641,0.632706994,1.582845742,0.320406114,0.401305472,0.222461614,0.383434953,0.39664113,0.827377195,0.861450078,0.26940288,0.871106065,0.018366236,0.128270785,0.996035494,1.064904467,0.801579906,1.161390648,0.361349893,0.524416228,0.418135862,0.147850704,0.963819747,0.079491232,2.394307973,0.067088115,0.254704361,0.241053932,1.044859534,0.720462064,0.211847177,1.607036486,0.481684058,0.310151689,0.074242189,0.33758907,0.117670027,0.377358197,0.806105461,0.349621171,0.242015046,0.330350256,0.459444272,0.166342776,0.507373126,0.168892003,0.681516508,0.024193776,0.751237459,0.156143038,0.279829661,0.138996543,0.063412285,0.194694281,0.137304311,0.081532413,0.23366439,0.337513318,0.067871042,0.162602679,0.05564096,0.068984836,0.175743767,0.011686801,0.01281683,0.012703248,0.051716375,0.050134428,0.006911807,0.027414379,0.03277006,1.664566477,0.356947535,7.138481835,0.814833271,0.404486974,0.175721015,1.741524176,0.377778481,0.088467722,0.177863306,0.073016584,0.066199092,0.068919541,0.153520191,0.504406197,0.034953563,0.081808258,0.045343064,0.059631413,0.07244129,0.028796291,0.060683674,0.036149432,0.013844827,0.010720412,0.0075809,0.097614677,0.018593125,0.031150059,0.009580897
E07000143,2014,0.56125131,0.608645645,0.617761083,0.318258293,0.188824238,0.176860471,0.613175524,1.558892399,0.31492461,0.39200442,0.218985326,0.367000898,0.382911937,0.817802126,0.848303184,0.261570061,0.851742171,0.016900535,0.124146298,0.971211302,1.036222215,0.78237598,1.13266097,0.350732724,0.511574175,0.410841005,0.142487024,0.933288481,0.077344004,2.319348892,0.065509158,0.248777417,0.230362979,1.013726822,0.703187095,0.208923667,1.567736056,0.466003841,0.303930596,0.081036719,0.327774558,0.115408201,0.360466936,0.824537862,0.341223083,0.237061103,0.322857689,0.445758716,0.16089969,0.49581265,0.163687297,0.669244047,0.024135816,0.751743266,0.153629348,0.273008332,0.135001899,0.060678544,0.18698784,0.135143447,0.079272071,0.225840038,0.332766429,0.06726825,0.155481887,0.053652993,0.067926471,0.174182577,0.012051774,0.011294364,0.01212105,0.050144222,0.049765792,0.006377351,0.02844371,0.034271758,1.642477836,0.363812459,7.001643381,0.782364199,0.400381083,0.183022511,1.711011532,0.395695366,0.088176563,0.175091255,0.073688944,0.059805759,0.07114286,0.14916714,0.494580855,0.033681289,0.077527217,0.04278642,0.056925985,0.067916219,0.028603753,0.059886097,0.034010268,0.012755665,0.010449003,0.007328827,0.086097424,0.018461455,0.030821625,0.00911569
E07000144,2014,0.592162173,0.639373117,0.648821704,0.319007736,0.205290107,0.187192362,0.651045434,1.50930613,0.323648177,0.409101622,0.22759541,0.38599363,0.411761137,0.815647138,0.873086221,0.271107019,0.888028586,0.018248994,0.127439304,1.002044195,1.079024858,0.812514031,1.161950767,0.35933266,0.537313936,0.420408803,0.152829501,0.964055996,0.0813987,2.386766933,0.065247846,0.26055076,0.237400329,1.04896699,0.713616209,0.217485425,1.663198052,0.482074172,0.311968173,0.065424384,0.335810504,0.119805179,0.379106057,0.842167725,0.346086712,0.25234265,0.344927142,0.465128292,0.167710703,0.520278533,0.167947761,0.68898592,0.024678724,0.772249751,0.150372472,0.279991218,0.142642415,0.064693244,0.202623986,0.145316108,0.080837814,0.235389584,0.307167088,0.072317536,0.157952002,0.054786833,0.071837318,0.173596094,0.012215901,0.012876623,0.012745382,0.051529545,0.052345656,0.006658696,0.028128177,0.037718773,1.667986928,0.376044043,7.39680933,0.861125357,0.424009832,0.178452188,1.718789954,0.393828815,0.090561986,0.18234442,0.07488256,0.070308505,0.07242266,0.153385606,0.518433027,0.033483182,0.07773472,0.043500236,0.057701929,0.069889738,0.029069569,0.062038572,0.035848958,0.012440495,0.0102463,0.007927133,0.077829823,0.018625993,0.033337239,0.009364676
E07000145,2014,0.536930158,0.591944075,0.602342157,0.30442579,0.18440009,0.172283686,0.601473399,1.568745716,0.309036425,0.382866055,0.213533244,0.361074924,0.37542286,0.80549739,0.829863645,0.254136016,0.824693848,0.016353119,0.12152886,0.943145667,1.011416287,0.76298706,1.106281928,0.341678911,0.497033465,0.394813549,0.139242469,0.90576657,0.077703954,2.261198129,0.065826687,0.241382222,0.227575352,0.993219532,0.6853372,0.204911745,1.477344345,0.450845225,0.300609993,0.077561726,0.317501249,0.113906254,0.358666826,0.805121745,0.331601745,0.230762315,0.31456565,0.431476801,0.158040978,0.479699207,0.159837558,0.651786825,0.024295736,0.720859313,0.153913892,0.269891376,0.130886466,0.059180424,0.171570786,0.130608826,0.076212414,0.219817352,0.350331389,0.065300633,0.158055279,0.054791644,0.066018262,0.171171581,0.01157671,0.01135745,0.012798145,0.04848391,0.048000884,0.006151247,0.027125523,0.033368723,1.598126982,0.356831873,6.734156131,0.749519739,0.387114089,0.184474462,1.666813304,0.381873191,0.088107961,0.167642865,0.073296012,0.054723464,0.070659895,0.142752059,0.489025183,0.034878608,0.080554719,0.044596172,0.058758018,0.070991798,0.027442372,0.058627873,0.032193967,0.012614292,0.01091194,0.007155842,0.08878184,0.017649146,0.029192302,0.008930209
E07000146,2014,0.57249369,0.611906968,0.622414116,0.327034803,0.196262443,0.183360837,0.626012708,1.57903595,0.314227004,0.400292188,0.222763335,0.377572301,0.387567772,0.807686039,0.846920735,0.266934292,0.862381812,0.017859706,0.123216656,0.975886787,1.043225077,0.802525962,1.149244117,0.362350725,0.518253067,0.41171435,0.144021617,0.950701286,0.07674453,2.372151622,0.065747032,0.249916784,0.239088644,1.018641107,0.702228689,0.21195995,1.566709569,0.478715275,0.310086196,0.073936303,0.334757108,0.117845967,0.370810455,0.814134351,0.338847124,0.241713366,0.324860721,0.444626804,0.162322136,0.499380899,0.165461298,0.680191523,0.024351945,0.737276897,0.157401923,0.276402503,0.142566119,0.061937173,0.176831515,0.136709385,0.084745955,0.235290228,0.345326034,0.068502448,0.153069216,0.056467531,0.06965914,0.168894803,0.011788184,0.011991009,0.012071064,0.052331387,0.049273317,0.006443712,0.026588424,0.034943892,1.620601845,0.354881672,7.023404293,0.774276858,0.381330489,0.172311431,1.696886549,0.336630802,0.088004323,0.17018432,0.070371338,0.060266188,0.066800308,0.151655259,0.484941249,0.032555472,0.07547738,0.041622171,0.054845848,0.065756873,0.027102908,0.056815337,0.03326873,0.012818281,0.010129557,0.007444626,0.102061899,0.018640993,0.030971924,0.010056564
E07000147,2014,0.600184479,0.625559324,0.648868903,0.33624239,0.211756909,0.196141045,0.658812141,1.567245277,0.320743433,0.415161227,0.238309154,0.404469258,0.403923679,0.79748199,0.880470376,0.274332014,0.888917279,0.018309212,0.125856943,1.016304935,1.059653832,0.852492526,1.199213445,0.387491335,0.552033858,0.419006283,0.156946051,1.00558648,0.080636816,2.484106166,0.06397127,0.257958487,0.261561377,1.054948679,0.705070199,0.224050873,1.664408749,0.50387368,0.32733464,0.064155979,0.356094846,0.125386261,0.412889619,0.867248454,0.333968231,0.258456204,0.347212994,0.442899013,0.17252622,0.526575667,0.159516571,0.724541362,0.024779087,0.742895024,0.160175049,0.312753001,0.155055989,0.064453006,0.168951404,0.151960523,0.093944917,0.254826729,0.343740703,0.077101374,0.156544282,0.059243021,0.076947939,0.166025061,0.01301315,0.012945657,0.013432621,0.056017532,0.054854139,0.007475875,0.026171813,0.037548922,1.65166578,0.336335445,7.255993705,0.813560739,0.350413041,0.153529097,1.586577535,0.313378956,0.083854352,0.153539975,0.063702289,0.058822018,0.062319155,0.144643593,0.447070088,0.028004706,0.065036345,0.036023675,0.047636959,0.057592711,0.027925645,0.051627904,0.034107369,0.014385496,0.008630528,0.006536643,0.112052275,0.017715479,0.030999358,0.009636755
E07000148,2014,0.47668311,0.555657002,0.557472694,0.285764745,0.173771098,0.149978641,0.558799854,1.461102513,0.284251884,0.344444741,0.182563551,0.311851098,0.352312278,0.774799806,0.746249771,0.233695465,0.753410031,0.015870689,0.125307505,0.849528817,0.941546054,0.66455622,1.013028001,0.292464336,0.433892841,0.356069028,0.116759468,0.81013767,0.0735995,2.015925585,0.064609978,0.224218074,0.194251753,0.9196146,0.632984369,0.193588314,1.278130683,0.390807218,0.280178251,0.0871231,0.276627589,0.099616929,0.315268796,0.705319631,0.320252447,0.212641053,0.281567756,0.433062769,0.143383594,0.433201872,0.163919173,0.574159175,0.02362279,0.651527504,0.147349389,0.236160899,0.111023715,0.054558149,0.166369098,0.110234907,0.066884614,0.188790427,0.339852231,0.054377949,0.16401657,0.054869576,0.0575648,0.16183185,0.008574806,0.010730262,0.012784712,0.042304324,0.041274336,0.004726605,0.024914923,0.026305111,1.643067867,0.458527922,6.831250386,0.728721576,0.466912213,0.224094271,1.86028281,0.489095465,0.095321842,0.222197556,0.089692536,0.057994062,0.078787226,0.172427589,0.595432189,0.030592232,0.070060675,0.037888432,0.050117549,0.05949574,0.030132057,0.069294472,0.031075965,0.011503468,0.009785986,0.008017071,0.09754732,0.019492274,0.02757825,0.011581015
E07000149,2014,0.57724985,0.618290964,0.631637114,0.313715322,0.203247493,0.183956239,0.649343976,1.414644553,0.313595076,0.397577648,0.218267342,0.374492716,0.402745712,0.796547882,0.842252859,0.264380434,0.861109873,0.018393333,0.127275689,0.970634498,1.051994814,0.790254122,1.132238607,0.350223074,0.517716808,0.402668492,0.151156802,0.934257311,0.085374969,2.302382688,0.064663085,0.256654122,0.234528151,1.042649062,0.690805056,0.215912054,1.588887852,0.464487267,0.311386277,0.074902557,0.331583558,0.116114783,0.388378598,0.796688042,0.338413107,0.249538441,0.338097406,0.46175811,0.168091247,0.504525476,0.16879787,0.672299291,0.024859741,0.725762928,0.156997326,0.290347197,0.140681258,0.064298275,0.192483673,0.139053021,0.080110529,0.229286544,0.305130174,0.068881544,0.167527242,0.058681387,0.071593261,0.163920748,0.011201661,0.014828918,0.014588085,0.051494756,0.050701368,0.006465289,0.025555043,0.033210453,1.605994258,0.372740822,7.169847505,0.816868179,0.40198685,0.165424209,1.672786026,0.389204594,0.08618109,0.174682406,0.070622047,0.069361467,0.067957875,0.14337951,0.492222833,0.035434464,0.081931893,0.045828447,0.060647019,0.072978108,0.029959621,0.058311908,0.037384429,0.012396973,0.010928072,0.007347693,0.096133714,0.018266619,0.030890572,0.008375006
E07000150,2014,0.500416637,0.580119788,0.578419007,0.299100736,0.166383474,0.154690446,0.560143289,1.516739057,0.299009032,0.362703134,0.193764273,0.331507119,0.354231625,0.807019908,0.79747807,0.246556025,0.801926335,0.015596325,0.121401416,0.901355646,0.987864311,0.704901956,1.05632832,0.309591069,0.459643049,0.395356415,0.122534414,0.8456084,0.072272182,2.153786476,0.068087603,0.232828166,0.199858303,0.949807838,0.686723601,0.19062455,1.392150538,0.421890747,0.280051697,0.08842141,0.296618061,0.101912271,0.302817941,0.726290969,0.344942609,0.210731134,0.285377255,0.437058258,0.145975067,0.451544524,0.171551118,0.602517175,0.023061074,0.731956125,0.146523006,0.228066297,0.112908851,0.055823238,0.189671177,0.112939122,0.067701722,0.196058135,0.334953622,0.055076338,0.151184161,0.048722574,0.058371156,0.174881923,0.010167257,0.011136355,0.010729762,0.043888347,0.042634017,0.004387271,0.028999707,0.028756807,1.551615768,0.389071716,6.598107852,0.712517835,0.424528761,0.202760947,1.801815414,0.449354991,0.091184757,0.193859365,0.079889003,0.055460055,0.075207615,0.151020504,0.525912051,0.039176644,0.091030127,0.049717968,0.066224763,0.078461319,0.026768128,0.065162558,0.031407111,0.010649456,0.012388818,0.00769568,0.112115135,0.018773357,0.029961984,0.009785256
E07000151,2014,0.584675385,0.637377409,0.636903837,0.312262481,0.202695995,0.178890853,0.648557423,1.428774,0.31536437,0.396039523,0.21463593,0.377044111,0.411011291,0.808527803,0.849574573,0.267945492,0.874862965,0.02002775,0.128850283,0.978549306,1.075432902,0.778105041,1.131899597,0.343229805,0.516452078,0.413765081,0.15328135,0.951310628,0.082667162,2.33259671,0.066225616,0.259738096,0.231721418,1.045967132,0.705811828,0.210151083,1.664797928,0.464187737,0.305467389,0.07340313,0.325163298,0.111647502,0.381892724,0.763051325,0.359449061,0.243044474,0.3314642,0.484133617,0.167172269,0.507762571,0.174256099,0.660247648,0.024209436,0.758021746,0.149130254,0.267754735,0.135723524,0.064923959,0.237429906,0.137583223,0.073381744,0.222089666,0.288715981,0.064162566,0.169570356,0.053806184,0.068446601,0.170849997,0.010396521,0.016461297,0.014084096,0.050232774,0.049208354,0.007018605,0.026359388,0.027705383,1.692984212,0.395318031,7.406126529,0.892603293,0.455581409,0.182323161,1.789457828,0.458908083,0.087192937,0.200556646,0.079610903,0.076972108,0.072513489,0.149663331,0.542374767,0.03727691,0.086100518,0.048284656,0.063832537,0.076795404,0.033086267,0.067023403,0.045736611,0.014454838,0.011562787,0.008197502,0.08360134,0.019429725,0.032585377,0.009094035
E07000152,2014,0.584307806,0.62853796,0.627735869,0.316014127,0.195936259,0.172481137,0.628294951,1.4437716,0.314847246,0.389981299,0.205080019,0.364800577,0.402572148,0.817475042,0.832337985,0.259890171,0.853875705,0.01857242,0.127817634,0.962839343,1.052463265,0.74842311,1.107092642,0.331976259,0.505557416,0.406400017,0.147278416,0.911941014,0.083702755,2.25270973,0.064196239,0.254099887,0.220820701,1.025957053,0.692367879,0.207909093,1.63225421,0.446919867,0.301390318,0.086728765,0.311267944,0.109391238,0.363495375,0.793361813,0.350287363,0.239903494,0.328338543,0.473379628,0.167485109,0.501359526,0.169897563,0.654290339,0.024850571,0.760268521,0.148824225,0.264302956,0.132858787,0.064695873,0.235703755,0.135997782,0.073125039,0.214172609,0.282786763,0.063811401,0.169522121,0.052868558,0.068747524,0.174431687,0.010894206,0.012479879,0.013200488,0.049307289,0.05000728,0.006826235,0.028066409,0.030353201,1.693281134,0.40874324,7.454843419,0.878456828,0.475894312,0.191334232,1.852059783,0.485299377,0.0887368,0.209451741,0.080278679,0.077194827,0.075786571,0.159076035,0.551069717,0.038144318,0.088569333,0.049213127,0.064976713,0.078260901,0.031226643,0.069195164,0.038473174,0.013175559,0.01177126,0.008360008,0.069727086,0.019477219,0.031711493,0.009432484
E07000153,2014,0.531389323,0.589877508,0.595302363,0.29899886,0.183530768,0.165426766,0.604770067,1.442132702,0.302589198,0.374483269,0.200236227,0.34132714,0.375793058,0.806381664,0.800373957,0.248873307,0.809105887,0.01765453,0.125766955,0.915127917,1.014721547,0.726580924,1.072833576,0.319352203,0.474018813,0.38539142,0.134852524,0.866557045,0.081850301,2.161383694,0.066127205,0.24261151,0.21352704,0.98959083,0.675880415,0.20113166,1.444982533,0.425362914,0.292296808,0.092529932,0.304278946,0.108499888,0.348042914,0.7354483,0.335715571,0.227463392,0.306145109,0.453583472,0.157570525,0.469031917,0.170261604,0.622998057,0.024434336,0.703032993,0.160239886,0.263647248,0.124329507,0.059936651,0.189919428,0.121239646,0.069065541,0.206911157,0.319784841,0.06009291,0.173063627,0.055426512,0.06362341,0.160734395,0.009706766,0.013489048,0.013969623,0.047043006,0.045460116,0.005539971,0.026172536,0.026568161,1.589712075,0.378096312,6.804103872,0.763014247,0.422045906,0.18550394,1.74602884,0.436272495,0.087802384,0.18964014,0.076742428,0.066977035,0.072457215,0.144618033,0.517186366,0.038602026,0.088367045,0.048922505,0.064732904,0.077575919,0.030165037,0.062909179,0.034229269,0.012158009,0.012038121,0.007523262,0.087661297,0.0184174,0.028779791,0.008434969
E07000154,2014,0.49540613,0.567315613,0.565438748,0.28684388,0.175507782,0.151433905,0.573938797,1.322845056,0.286378061,0.349047187,0.182483271,0.313489039,0.363950574,0.768275583,0.744445511,0.234829415,0.762666748,0.015972731,0.128079381,0.858997641,0.961670169,0.66043001,1.001633472,0.288357801,0.444362776,0.3591193,0.126277393,0.822941643,0.08024466,1.981504672,0.06233127,0.230677281,0.193412695,0.944343014,0.630694042,0.193768632,1.336505179,0.388426977,0.279179979,0.095119891,0.27921101,0.10031685,0.332650369,0.700489772,0.319675157,0.220704714,0.297080239,0.454739409,0.149042664,0.444482447,0.168995594,0.572516605,0.024823099,0.664517498,0.144589795,0.265424838,0.112655883,0.056838541,0.185676183,0.115827396,0.062508582,0.184765304,0.289506093,0.054368664,0.179736513,0.058091733,0.059518456,0.160473472,0.008618601,0.0119001,0.014197785,0.040974873,0.045483979,0.005017741,0.024786983,0.026418493,1.538317014,0.4279241,6.677345968,0.748834181,0.459445134,0.19939664,1.799905491,0.520255381,0.089327207,0.205443999,0.083179451,0.064893508,0.077299688,0.151835065,0.557915828,0.037668217,0.086446931,0.047027651,0.062086786,0.073966596,0.028161648,0.065361475,0.032852059,0.012110341,0.011967385,0.0079681,0.077217402,0.017927036,0.028882334,0.009351156
E07000155,2014,0.59745689,0.647388668,0.643268908,0.312959224,0.203895908,0.179640973,0.652649704,1.433896213,0.320035864,0.402101045,0.212336195,0.37850216,0.416289679,0.820405673,0.850840851,0.267605505,0.884869679,0.02046993,0.12996838,0.981134061,1.078890808,0.770566204,1.13226601,0.34194271,0.524662453,0.41776899,0.15449028,0.950591701,0.083568614,2.313175753,0.064504042,0.259432407,0.224204712,1.051527257,0.706331232,0.211424927,1.703796722,0.461771942,0.307102225,0.07720675,0.325804042,0.111276028,0.373078731,0.796012999,0.360925405,0.245050109,0.340457983,0.488991687,0.168848162,0.515520459,0.174142109,0.66620241,0.024596323,0.781916162,0.151436688,0.271385455,0.137620384,0.065470478,0.238880932,0.139420263,0.070972369,0.221624049,0.27348265,0.065216631,0.167377318,0.052730481,0.068756476,0.176766193,0.010893897,0.013286238,0.013496504,0.049503794,0.050939399,0.006895839,0.028346337,0.031587773,1.707476641,0.406184951,7.649713708,0.92434296,0.478182564,0.186030623,1.83149047,0.483073783,0.09067422,0.213923746,0.079977288,0.086691948,0.073597155,0.155651799,0.561810826,0.038236821,0.089011897,0.049366016,0.064805937,0.078599863,0.031835314,0.068371764,0.040897017,0.013544603,0.011782142,0.00829376,0.061604017,0.020183663,0.0333223,0.008881182
E07000156,2014,0.514915423,0.580982548,0.590033155,0.293943364,0.185563419,0.166112738,0.600917375,1.405720459,0.29992865,0.367300264,0.196487841,0.331246822,0.374382728,0.791642965,0.774056069,0.247329338,0.788531241,0.015774883,0.12676929,0.901423859,0.991880594,0.709469908,1.056396178,0.316911241,0.469212455,0.370248367,0.137743675,0.855991099,0.085857176,2.095623202,0.062319474,0.240338067,0.211211941,0.990964623,0.656904077,0.204901762,1.38351548,0.413045705,0.290647621,0.095635342,0.301443787,0.108683039,0.356740777,0.733714647,0.318403881,0.231620556,0.310422258,0.449745062,0.15991078,0.464876203,0.16626105,0.612633002,0.025656969,0.681594287,0.158889903,0.280774605,0.123570481,0.062351649,0.173580912,0.118498373,0.068551172,0.202368308,0.306481593,0.05945065,0.182520508,0.06129643,0.06456116,0.159123037,0.009640836,0.012357203,0.015392785,0.04515941,0.045526726,0.00560855,0.024357562,0.029123433,1.477795331,0.357110008,6.519770089,0.708311432,0.4020065,0.178930958,1.733812366,0.40989294,0.08719486,0.178034113,0.073364892,0.060642717,0.070285803,0.139490616,0.512329249,0.038655112,0.089822618,0.049232007,0.064251276,0.077448434,0.027261064,0.060132586,0.029959933,0.010447213,0.011931756,0.007777252,0.085067788,0.01736572,0.029639644,0.009141238
E07000163,2014,0.591157664,0.628852909,0.633287726,0.321429595,0.207508695,0.19013652,0.646174638,1.560159271,0.317344769,0.410875976,0.224048816,0.391155961,0.408230937,0.789575722,0.844403864,0.273707154,0.886333567,0.017784654,0.124037828,0.992049296,1.058175776,0.806355581,1.153958743,0.366821871,0.534688408,0.413149406,0.154617389,0.966138144,0.076383634,2.389872502,0.063935532,0.252814197,0.243154631,1.033719397,0.695877097,0.21784004,1.608144494,0.484582489,0.309988715,0.066659757,0.32730732,0.118219918,0.381683172,0.809137757,0.333176613,0.250933666,0.333825137,0.453197888,0.166821183,0.515436042,0.163792816,0.675008829,0.024431763,0.742901518,0.153075169,0.266457604,0.14543305,0.064983801,0.186868334,0.140000335,0.080444425,0.240682362,0.312388439,0.070386365,0.155501151,0.057495248,0.071318848,0.174144448,0.011628269,0.011340481,0.012091121,0.05316116,0.049585562,0.006540534,0.025825544,0.03707751,1.646017237,0.350278521,7.274168776,0.824589797,0.403667052,0.16745829,1.743495522,0.304914579,0.091433203,0.174956181,0.070502964,0.071406385,0.066113677,0.161542744,0.513465659,0.033645541,0.077732896,0.044683454,0.058823428,0.070756235,0.027214225,0.057574346,0.033632386,0.012162516,0.010321898,0.008548559,0.083294489,0.018579115,0.034364478,0.012749482
E07000164,2014,0.56668066,0.617677578,0.625053818,0.312675552,0.196953933,0.184273364,0.631894743,1.477776869,0.313889005,0.398369222,0.222017876,0.381032827,0.396515403,0.796727398,0.852452862,0.266271434,0.868995059,0.01777366,0.125340038,0.980527887,1.045071813,0.797321768,1.14314415,0.358076462,0.521341433,0.412184039,0.15081289,0.950455861,0.077682758,2.344153148,0.064290065,0.252711317,0.23321805,1.027755295,0.697392511,0.211667906,1.579537109,0.47142853,0.305326731,0.064697803,0.334406921,0.115619131,0.372529858,0.804465052,0.339530686,0.242911,0.330636215,0.449565538,0.162950684,0.502467793,0.166499835,0.671024917,0.023533917,0.737419262,0.151375011,0.271681125,0.139376339,0.061337841,0.181668078,0.137177421,0.078459367,0.232428021,0.314223681,0.068579047,0.153040649,0.055453824,0.068997509,0.172907273,0.011346447,0.011856546,0.012459102,0.051046996,0.049266459,0.00626723,0.027140536,0.03543065,1.607641546,0.357390353,7.045256513,0.796020264,0.390701946,0.168615151,1.666809808,0.355761477,0.089219663,0.167622484,0.071001661,0.06558515,0.066791838,0.146838762,0.490260005,0.033253304,0.075847864,0.042772903,0.056618342,0.068245797,0.027196772,0.058019132,0.03513918,0.011937591,0.01028737,0.007779451,0.093072283,0.017828428,0.031513242,0.009731992
E07000165,2014,0.554102279,0.606447555,0.614793995,0.303220292,0.197873415,0.17545582,0.631737998,1.423775862,0.308127414,0.386670588,0.210195784,0.357355659,0.393735877,0.798194506,0.819987498,0.259679265,0.836564237,0.01785057,0.127228364,0.953341372,1.036820774,0.762122638,1.103495373,0.33405289,0.501778273,0.39555398,0.145802653,0.89707893,0.084486832,2.237720747,0.063852942,0.250569257,0.224360661,1.01685556,0.683501643,0.211649054,1.528363977,0.445057707,0.300073114,0.080949984,0.316640846,0.112326058,0.370897658,0.766228284,0.33698379,0.242436066,0.324803233,0.460767531,0.163112199,0.494326113,0.167800076,0.651800576,0.024875867,0.715241755,0.157960997,0.281374115,0.132439545,0.062726116,0.193078702,0.129878461,0.074401726,0.217995023,0.298414846,0.065482823,0.173915627,0.058154933,0.068486897,0.16386382,0.010557051,0.014392808,0.015230419,0.049005295,0.047995859,0.006036744,0.026048517,0.03066361,1.602357097,0.368401718,7.055155072,0.787796415,0.4179097,0.175378327,1.728382344,0.415455447,0.087940218,0.187978493,0.074951623,0.073792603,0.069888109,0.147135612,0.515592448,0.034907262,0.080894633,0.045023422,0.059851253,0.071686268,0.03012076,0.061210739,0.035148651,0.012027632,0.010814313,0.007599894,0.083930601,0.01842257,0.030849165,0.0096915
E07000166,2014,0.537195339,0.587815669,0.598284097,0.305348194,0.185568981,0.17132821,0.605275011,1.469053285,0.306740848,0.37744197,0.206510761,0.351986344,0.374524663,0.800321925,0.808405349,0.253181342,0.815036157,0.017121362,0.124790847,0.934158547,1.013003587,0.75386664,1.097209725,0.333434131,0.488576643,0.390988172,0.137725457,0.886643129,0.080762924,2.229258672,0.06365968,0.244550919,0.221582253,0.992068087,0.68132693,0.203722254,1.491125418,0.440658677,0.293700543,0.082651573,0.314460567,0.110568739,0.349480336,0.781109762,0.333134852,0.231952045,0.310576997,0.444037348,0.157864714,0.473774964,0.164085595,0.641370805,0.024159954,0.714006966,0.154772329,0.274180532,0.128247441,0.060192666,0.184875016,0.125968269,0.07539861,0.216256065,0.329722582,0.062202838,0.163686019,0.056112938,0.064938602,0.162917237,0.010648903,0.011060287,0.013893377,0.04791032,0.04723337,0.006277907,0.02635953,0.030653971,1.602542189,0.348596311,6.781411735,0.750990654,0.389606036,0.174041458,1.704796624,0.391764304,0.087635632,0.176564269,0.072786637,0.062479633,0.068345564,0.147411543,0.498988673,0.036248032,0.083964737,0.046386716,0.061564069,0.074178021,0.028373445,0.060854171,0.035558793,0.010958956,0.011112604,0.007125614,0.101782682,0.018023862,0.030031993,0.008520422
E07000167,2014,0.594518631,0.628429801,0.636815126,0.320257497,0.21125517,0.190732358,0.64863082,1.498437432,0.31416707,0.405673275,0.221881508,0.393217408,0.412145886,0.77590808,0.835851806,0.275895889,0.892432875,0.017219338,0.123417283,0.991571478,1.048968005,0.803046111,1.14572831,0.361840884,0.53800765,0.412155195,0.158119459,0.952116877,0.077580595,2.362985666,0.062032394,0.253696903,0.240887026,1.030575806,0.685593877,0.218625472,1.622883293,0.480353063,0.308307286,0.06367647,0.327843881,0.116661032,0.382524825,0.822071565,0.331770728,0.252361367,0.337914225,0.451437158,0.169486058,0.51901928,0.160547249,0.679007604,0.02481724,0.753109764,0.146160643,0.268947099,0.144187385,0.06652211,0.191230501,0.144575733,0.080460373,0.238120375,0.29536194,0.071767995,0.15184003,0.05695254,0.073032413,0.174716832,0.011371745,0.011839013,0.012276563,0.053569176,0.050683423,0.00670549,0.024865389,0.042419778,1.663636146,0.371622814,7.4693565,0.8743719,0.417002339,0.170633405,1.739106762,0.3274147,0.090875373,0.174047916,0.070901925,0.071825121,0.067814364,0.163007122,0.51504536,0.031187781,0.072296471,0.040414361,0.053256098,0.064173477,0.028326671,0.060300608,0.035912968,0.01098834,0.009483865,0.00862669,0.079440852,0.018173525,0.035061104,0.012673871
E07000168,2014,0.555870771,0.597289399,0.616661177,0.318873071,0.190008032,0.179180146,0.613470643,1.595184958,0.307674379,0.392061464,0.221865946,0.376867399,0.377742778,0.801909612,0.842708999,0.2612792,0.846417437,0.018021982,0.121696682,0.960950578,1.022269361,0.798554577,1.148699397,0.364224881,0.510018621,0.404662796,0.140854619,0.94905233,0.075695851,2.369066749,0.06485357,0.244451648,0.243586472,1.009952877,0.695304596,0.207043292,1.515123789,0.47920531,0.308814911,0.066882089,0.337078868,0.117537416,0.368928698,0.793380546,0.333290034,0.234481047,0.318140764,0.432007335,0.159843648,0.490018459,0.162833268,0.674544376,0.023379019,0.718993566,0.161486107,0.282088604,0.13877271,0.059992299,0.161557232,0.133200222,0.083954569,0.23607565,0.364021895,0.068251089,0.154062774,0.056146396,0.067576344,0.162754805,0.011769607,0.012415202,0.011823285,0.051223082,0.04880618,0.006380292,0.026801898,0.029962474,1.591949029,0.34106481,6.748275073,0.729590292,0.352933229,0.165424804,1.609289617,0.325050286,0.085447316,0.157896954,0.065562603,0.053146806,0.063848182,0.14087361,0.452489065,0.031124755,0.071660628,0.039715217,0.052484235,0.062995309,0.026156156,0.054796285,0.031669788,0.013086164,0.009733586,0.006313734,0.111647474,0.017904527,0.029008726,0.008757076
E07000169,2014,0.558183424,0.618182814,0.618485342,0.301859256,0.194023281,0.17337751,0.627213153,1.44126428,0.307302839,0.382200475,0.20640526,0.362541611,0.396624382,0.799248733,0.817182439,0.25603613,0.844989709,0.018585256,0.126358672,0.941972173,1.033629467,0.747886068,1.096779441,0.330366599,0.499877154,0.397263852,0.145367201,0.911175479,0.081075078,2.227112437,0.063621729,0.248751489,0.219091032,1.016470203,0.683925536,0.204758041,1.578056713,0.442401856,0.297821101,0.079303254,0.315089962,0.108984484,0.361928178,0.775769355,0.345309228,0.235698804,0.323511034,0.46485316,0.162976043,0.489629916,0.168966564,0.637982863,0.024431868,0.743499141,0.149120117,0.269783651,0.129905239,0.062812423,0.214990852,0.13105965,0.071388732,0.214994889,0.301655367,0.062576921,0.166011894,0.053961984,0.066076731,0.170634726,0.010340777,0.013472525,0.013738731,0.047851898,0.04789371,0.006276726,0.02675426,0.030836609,1.659163576,0.386155252,7.158367238,0.847433112,0.446794403,0.185767102,1.766782111,0.453697064,0.088601069,0.1995383,0.077455813,0.07337433,0.07318112,0.150387384,0.537333738,0.034485294,0.080481266,0.044252608,0.058420111,0.070523391,0.030843736,0.065667646,0.040422529,0.012076016,0.010746078,0.008065201,0.079297635,0.019171825,0.029922533,0.009046997
E07000170,2014,0.538028341,0.606879107,0.604444721,0.308356407,0.179389322,0.167190298,0.592536487,1.560430186,0.310778721,0.378440242,0.207477347,0.361009189,0.374975505,0.821469516,0.832035502,0.257810841,0.838000424,0.01738807,0.124091264,0.947962134,1.028653745,0.754923945,1.113667673,0.33616313,0.491733379,0.409489793,0.135578102,0.914995294,0.074407762,2.285784054,0.068244244,0.242794114,0.222647169,0.995616856,0.709555824,0.199503236,1.515051751,0.455876009,0.298422629,0.076757207,0.317900814,0.110016151,0.34160179,0.763650127,0.352237853,0.223258762,0.306826635,0.44961632,0.156325743,0.478831719,0.171764167,0.638555199,0.024448381,0.743305544,0.148999991,0.253021187,0.125594478,0.058901894,0.192837948,0.125940794,0.072451965,0.213969764,0.34844885,0.059955815,0.155496548,0.05252231,0.061886396,0.180737198,0.01096304,0.012458165,0.011470942,0.046781948,0.045418966,0.005690057,0.027794196,0.032172636,1.633230436,0.38446436,6.8522651,0.770295622,0.421804106,0.1893986,1.774039245,0.432486418,0.08928478,0.185929114,0.076673039,0.058797112,0.072665796,0.151528428,0.51842671,0.03637967,0.083892064,0.046528684,0.06137852,0.073743924,0.027401942,0.063551776,0.035311178,0.013915867,0.011309583,0.007102441,0.103878725,0.019680238,0.029574235,0.009011807
E07000171,2014,0.552623147,0.610330394,0.618761403,0.314955967,0.190302712,0.17704966,0.622014723,1.566068585,0.310809148,0.391586115,0.216653706,0.371405342,0.386689874,0.827889417,0.836845297,0.263253034,0.851044678,0.018118784,0.127432642,0.964259823,1.046792382,0.785013321,1.143746168,0.351905509,0.504867568,0.407978487,0.142188582,0.938927164,0.080098623,2.335372702,0.067943767,0.249547025,0.234338158,1.025014058,0.709985059,0.208734291,1.516229001,0.466871483,0.306488007,0.07815107,0.332239192,0.11509108,0.365433382,0.774934867,0.348590114,0.235441033,0.31802615,0.455643626,0.161641378,0.488285776,0.172676149,0.66010214,0.024816093,0.729336374,0.161586452,0.27729455,0.133364843,0.061617585,0.180125911,0.128560055,0.077260866,0.226370657,0.357438809,0.063670037,0.16351549,0.058424965,0.065957777,0.17226097,0.010728811,0.012567725,0.013195775,0.050259684,0.047249439,0.006224136,0.026729568,0.030156492,1.64012471,0.355666333,6.88765242,0.767442158,0.393443449,0.178696279,1.746757929,0.376180659,0.089091308,0.175684043,0.072528575,0.060646618,0.068915204,0.149343641,0.499821154,0.034855342,0.080789796,0.045069109,0.059665741,0.071519179,0.027807258,0.059831739,0.036741987,0.012950869,0.010804087,0.007145605,0.108226921,0.018839202,0.029406329,0.009038844
E07000172,2014,0.545720221,0.604293892,0.620349636,0.309771169,0.195385086,0.171476656,0.631152262,1.47821291,0.305896624,0.377515001,0.2075602,0.353342087,0.391711298,0.822439468,0.816416556,0.257995748,0.822231522,0.019157241,0.131245349,0.940285695,1.038628415,0.760801211,1.107941119,0.332222065,0.488020832,0.388605396,0.140775504,0.890032141,0.087432778,2.230063051,0.065869109,0.252207215,0.228262207,1.018237977,0.688960991,0.210888741,1.49928655,0.442664729,0.306586615,0.085631147,0.318592634,0.112483363,0.374212536,0.754457441,0.34103645,0.242146769,0.322036993,0.461215535,0.166495178,0.482860352,0.173085186,0.652657409,0.02635828,0.709072197,0.164237477,0.293149019,0.131777149,0.06263562,0.193421109,0.128059075,0.076230398,0.217023942,0.338405759,0.06250709,0.177818469,0.061642408,0.067343667,0.159233555,0.010235987,0.014462777,0.016688424,0.048964285,0.047874095,0.006103794,0.02526049,0.025408445,1.656621458,0.388016874,7.054280235,0.796880847,0.425100154,0.183860203,1.765607987,0.454731218,0.086194735,0.196911285,0.077143544,0.069119935,0.071456109,0.147111096,0.522981371,0.032226399,0.074797612,0.041048421,0.054237572,0.06500601,0.030591689,0.064613901,0.036186595,0.013669495,0.010107051,0.006919309,0.096404699,0.018935833,0.027487683,0.007572803
E07000173,2014,0.546139123,0.60808628,0.611669918,0.312832881,0.19510093,0.173519021,0.623742627,1.479903961,0.30738588,0.38631435,0.210372722,0.355797791,0.390718734,0.806403248,0.813029837,0.260027538,0.833608795,0.017617595,0.129780921,0.945900325,1.0385105,0.758057592,1.105680261,0.335026758,0.496568386,0.393920808,0.142184568,0.915709901,0.082843938,2.24002052,0.065624146,0.249358888,0.225662998,1.014741202,0.688508531,0.211165795,1.498542768,0.45000919,0.302333349,0.081635239,0.316114708,0.113836489,0.36864122,0.762536607,0.336731165,0.240202993,0.324016647,0.463433426,0.161143514,0.488018068,0.174093699,0.6472723,0.02583204,0.712707345,0.157570773,0.285149722,0.132307484,0.061487435,0.186766498,0.128709729,0.076387429,0.216156557,0.322482342,0.063529055,0.175127966,0.061500548,0.066963181,0.166219496,0.010435636,0.013185243,0.014339524,0.048095551,0.049374018,0.005729817,0.025999164,0.030643102,1.609671144,0.379481716,6.982117931,0.77245028,0.422595233,0.183940881,1.781261032,0.415250685,0.089668829,0.189634995,0.076097181,0.066981794,0.071822359,0.153120548,0.529466358,0.034625557,0.079409349,0.044242533,0.058248578,0.069890696,0.027307875,0.06062715,0.033868843,0.012507373,0.010776299,0.007528059,0.089264345,0.018941801,0.030678602,0.010662325
E07000174,2014,0.521797274,0.596286655,0.598766277,0.304690037,0.178855447,0.165821042,0.591156154,1.560500489,0.305429603,0.375867413,0.205798495,0.346445023,0.372541869,0.82458569,0.823343934,0.252486961,0.822366467,0.016205256,0.125463596,0.937632754,1.013884468,0.742786736,1.099729041,0.328403295,0.4839755,0.395016198,0.131908977,0.889092073,0.077436693,2.235451972,0.067384937,0.242438742,0.21270141,0.990478002,0.697799927,0.202468805,1.465479074,0.435731787,0.294683275,0.087088652,0.315361262,0.108978456,0.336559607,0.778759916,0.346254663,0.224402566,0.305073441,0.444123433,0.156337057,0.473260135,0.170464745,0.634648303,0.024085788,0.730052275,0.153263675,0.262924375,0.122998393,0.057646975,0.180845718,0.123018886,0.071283001,0.210470792,0.348103301,0.060024843,0.162267399,0.054046413,0.062824417,0.17820378,0.010887824,0.012324162,0.012791894,0.045881296,0.046144839,0.005554125,0.02924832,0.031329704,1.604993227,0.380220044,6.746900943,0.736846976,0.414758927,0.195121087,1.783048668,0.438518618,0.090590736,0.182825212,0.077852369,0.057013326,0.073374632,0.15126813,0.516376198,0.033833018,0.076756109,0.04274434,0.05607975,0.066958531,0.027430615,0.063361638,0.032070075,0.01175988,0.010638249,0.007458516,0.115499403,0.019151973,0.028778222,0.009347516
E07000175,2014,0.558165954,0.608740325,0.617545842,0.31249597,0.192359098,0.177880523,0.6211947,1.540979799,0.31243768,0.390520115,0.215505487,0.369434784,0.387578933,0.814357665,0.83310718,0.263160467,0.849964829,0.017672627,0.125382805,0.963085319,1.041709988,0.78034612,1.129537065,0.348471534,0.503756357,0.406494262,0.140795422,0.927619752,0.079613723,2.311067395,0.066609401,0.249671493,0.232367606,1.015747324,0.700557052,0.209154737,1.516264102,0.467048932,0.30323651,0.073972743,0.328977995,0.114587483,0.362886208,0.779974527,0.341945188,0.236892424,0.319101318,0.451276219,0.160612407,0.489987279,0.168997863,0.655431713,0.024382706,0.728410572,0.158795888,0.272379164,0.133294873,0.061491541,0.179918693,0.129616968,0.077865259,0.225384206,0.339104434,0.06512543,0.160469999,0.057005526,0.06723849,0.168379722,0.010625524,0.012163622,0.013088033,0.050773413,0.047048912,0.00629886,0.026697999,0.030230643,1.617296604,0.353327978,6.933296642,0.760846216,0.40022917,0.178055695,1.741268415,0.362595453,0.090520045,0.178661003,0.073416439,0.062179936,0.070071305,0.152091671,0.50461575,0.03585527,0.08305316,0.046465762,0.061212247,0.073357446,0.027779484,0.060235747,0.036223337,0.011678531,0.011182953,0.007637554,0.104953527,0.018695068,0.031541908,0.010002551
E07000176,2014,0.585802629,0.627548922,0.631239898,0.307403373,0.208333707,0.174732093,0.653679874,1.355716029,0.312279701,0.394112296,0.207819026,0.367416775,0.411224548,0.796112065,0.830605523,0.26378469,0.857016577,0.019990509,0.129915143,0.959051866,1.061485279,0.75885975,1.102839215,0.329010744,0.507735588,0.399394417,0.148883303,0.90667759,0.087966467,2.238913898,0.064960964,0.256878015,0.222603619,1.030391636,0.68259948,0.211781162,1.615858866,0.445549549,0.303494072,0.077209823,0.317231801,0.110278662,0.376951815,0.766910059,0.345527148,0.247301104,0.338060088,0.482927429,0.166796897,0.506130348,0.17213659,0.656158035,0.024723489,0.719889507,0.154580329,0.274925293,0.135810025,0.063740268,0.223248083,0.135216222,0.075379147,0.218390981,0.269302144,0.065779427,0.173534194,0.055176601,0.070225146,0.162992082,0.010202695,0.013933881,0.015534753,0.05006129,0.04906803,0.006372766,0.026365942,0.027517624,1.676172711,0.421867099,7.600211991,0.89374384,0.472277318,0.187511986,1.791436533,0.485641243,0.089201809,0.222850422,0.082259853,0.088163798,0.074052071,0.153791517,0.55747096,0.03645082,0.083920184,0.047005685,0.062273763,0.074563441,0.031953637,0.068982255,0.040296317,0.012370021,0.011330984,0.008169562,0.076906779,0.019511922,0.032087692,0.008802157
E07000177,2014,0.561014569,0.622160518,0.619342297,0.314320451,0.190496622,0.170098224,0.626863489,1.415056743,0.312052866,0.386434923,0.204101413,0.354695254,0.395495346,0.812315706,0.829387186,0.258121398,0.853043747,0.01835412,0.128576181,0.947913631,1.050698388,0.744468073,1.106072912,0.327411018,0.495185844,0.401975471,0.139295659,0.896887027,0.081942167,2.228776272,0.066044168,0.25147383,0.216235753,1.020806245,0.695264213,0.208047559,1.539009834,0.442941709,0.300333004,0.090793684,0.31117656,0.109256099,0.351589238,0.755661146,0.353899418,0.235987618,0.321656194,0.475522953,0.160854967,0.48868468,0.178579188,0.63913417,0.024206981,0.743042541,0.153997131,0.262650174,0.128253898,0.061717897,0.216262612,0.127805949,0.070330069,0.211173954,0.303301272,0.061455185,0.170803556,0.055503741,0.065926968,0.171730826,0.010258808,0.012438309,0.013491632,0.047329384,0.047572062,0.005648678,0.02732199,0.027210633,1.660810974,0.429735429,7.269436581,0.827899456,0.465896549,0.195960504,1.853112416,0.492376189,0.092423322,0.211292689,0.082876738,0.068737357,0.076790988,0.157730859,0.556713096,0.038146142,0.087616145,0.048496787,0.063831045,0.076822054,0.0305851,0.067944139,0.038362831,0.012851314,0.011965373,0.00817474,0.08074256,0.019343929,0.031844935,0.009265063
E07000178,2014,0.475388734,0.555936735,0.569384464,0.277674659,0.185215148,0.144477193,0.601128631,1.303628672,0.28231309,0.327696313,0.170672217,0.280123937,0.380669669,0.765869734,0.700689845,0.229609707,0.721743655,0.016929289,0.135263595,0.81530214,0.964543547,0.622330532,0.95908134,0.264198458,0.416375358,0.321389337,0.128235984,0.750014989,0.09432063,1.794581699,0.058081553,0.230676063,0.188470906,0.945030707,0.595079449,0.203895887,1.227372491,0.345662959,0.279838356,0.11194811,0.249553486,0.097982381,0.352154524,0.659374476,0.301944579,0.23002738,0.30439081,0.466100677,0.158722361,0.43234522,0.167901297,0.549813657,0.029256728,0.615419066,0.159104225,0.267086503,0.112989584,0.0607721,0.175623921,0.110934863,0.061645508,0.176269609,0.284335626,0.053442371,0.199970722,0.069198706,0.06062093,0.145894489,0.007161321,0.012291758,0.02245887,0.040579964,0.045949851,0.005080519,0.021429188,0.018487502,1.653945519,0.49534661,7.127262539,0.785711639,0.519497613,0.231045963,1.930068704,0.595808379,0.094197649,0.257154411,0.096712226,0.091123162,0.083695381,0.172929889,0.647795984,0.035279361,0.081412188,0.044210466,0.058578704,0.070074586,0.033046304,0.075586605,0.027604468,0.015351453,0.011046223,0.00859216,0.062078433,0.017736735,0.027442483,0.009979832
E07000179,2014,0.605966374,0.645929874,0.64920291,0.31360775,0.215817928,0.182064476,0.674036763,1.391718032,0.319814257,0.405398363,0.214565098,0.372012448,0.425503095,0.806714136,0.847770304,0.271422509,0.888398338,0.020555789,0.133777205,0.982472538,1.088536167,0.774642989,1.124635942,0.333744425,0.524089326,0.414657369,0.154833098,0.922723929,0.089472585,2.286177817,0.065887558,0.26426401,0.224979394,1.056688527,0.701826784,0.21735245,1.674087448,0.457712345,0.308102897,0.083482727,0.318364372,0.113638357,0.381816769,0.801575359,0.35293671,0.255327869,0.347243624,0.497295945,0.170540833,0.522455972,0.174324271,0.667333375,0.02565594,0.758658238,0.154718761,0.27222973,0.137128122,0.065675527,0.233486624,0.139559356,0.074180013,0.223371082,0.265120892,0.068709729,0.179190558,0.055514928,0.07257666,0.166611634,0.010399379,0.015598878,0.015445183,0.051003426,0.050713572,0.006576484,0.027559438,0.031116627,1.707606438,0.428032829,7.844103111,0.9310989,0.487927342,0.189277388,1.844677841,0.492327601,0.093716152,0.229628384,0.084660287,0.093181588,0.075798578,0.15668227,0.572900961,0.03738067,0.086945499,0.047950948,0.063302811,0.076076466,0.034298734,0.07027473,0.041089759,0.011475136,0.011720565,0.008775745,0.068804922,0.019815143,0.035176198,0.009759935
E07000180,2014,0.588972492,0.632579586,0.635255635,0.309836074,0.209183054,0.17893853,0.660683571,1.306400941,0.312937643,0.398242072,0.209028992,0.363553711,0.416454075,0.793713614,0.831092951,0.264486601,0.865009458,0.020109441,0.133872528,0.956721123,1.060714551,0.757176497,1.104760058,0.325600344,0.511114798,0.402941502,0.154703872,0.903581906,0.090577585,2.24027446,0.065585897,0.25908396,0.21861006,1.050318941,0.681354222,0.214132474,1.627868595,0.441591505,0.305300568,0.082951962,0.316268088,0.112265183,0.387061662,0.779463352,0.348413296,0.251323875,0.342157324,0.488913946,0.170630841,0.509253168,0.175337229,0.655396649,0.024789313,0.740653096,0.150223443,0.273547763,0.133674292,0.064242004,0.22724573,0.138319844,0.07256585,0.216484051,0.261809419,0.067319821,0.182024398,0.055914179,0.07085565,0.164622029,0.010220594,0.016895308,0.015089553,0.049115881,0.051141505,0.00624101,0.025518701,0.030022672,1.648050927,0.439668792,7.629284934,0.900783905,0.475411297,0.182583898,1.773964998,0.510103059,0.09067396,0.214452281,0.081096558,0.091175138,0.073722456,0.144793428,0.55519324,0.037387239,0.085436853,0.047678938,0.063039564,0.075866533,0.034327842,0.06721974,0.040134469,0.011695649,0.011621556,0.00844891,0.070073551,0.018844146,0.032668264,0.008853676
E07000181,2014,0.590511707,0.640989506,0.643905292,0.319884084,0.204269492,0.178692442,0.654036494,1.465645619,0.320243327,0.400637132,0.214542821,0.370314025,0.412561432,0.821685753,0.853068505,0.268730768,0.877106819,0.020231298,0.130549874,0.981228835,1.079266597,0.777463079,1.13535272,0.341614085,0.518832449,0.413584131,0.149103832,0.933077836,0.083165266,2.312525133,0.065361997,0.259745394,0.226101421,1.045141703,0.709598729,0.214296117,1.652455377,0.460143081,0.308445039,0.083698731,0.323288228,0.113120969,0.36912861,0.800386772,0.358862374,0.247065824,0.338205288,0.483722529,0.167268068,0.513101468,0.175211981,0.672602595,0.025058028,0.767762453,0.155775317,0.2747931,0.137238223,0.064049039,0.226136427,0.136985698,0.074475701,0.22281178,0.295235641,0.066509354,0.168873531,0.053621407,0.070050281,0.173195656,0.011148163,0.013147099,0.013742762,0.050121552,0.050397154,0.006349933,0.028206024,0.030197126,1.716627083,0.427150984,7.63250439,0.88667055,0.472543529,0.191784183,1.839905813,0.484657056,0.092026092,0.219663046,0.082384617,0.079309706,0.075644812,0.157486831,0.562695724,0.036609294,0.084130068,0.046915754,0.061292321,0.073990064,0.031508616,0.069699121,0.037994551,0.013906258,0.011440324,0.008430168,0.07294688,0.020037658,0.032778994,0.009495009
E07000187,2014,0.590564981,0.639192518,0.646015797,0.326412944,0.204892738,0.186908814,0.655672953,1.564020969,0.324742101,0.412356902,0.224522195,0.389041976,0.411155194,0.836782742,0.874053356,0.27270597,0.890716754,0.019600122,0.131632014,1.004773348,1.089002735,0.811347873,1.177698284,0.36445732,0.53259043,0.421871498,0.151587125,0.978550222,0.081623075,2.411582614,0.068630317,0.259738368,0.24168207,1.064059969,0.724825544,0.217878318,1.623872644,0.482735472,0.316430634,0.078244101,0.339792458,0.118444914,0.38500627,0.801442362,0.357833464,0.248433346,0.33735516,0.477104312,0.169073546,0.516993911,0.175276563,0.688598182,0.024493199,0.753270441,0.162366836,0.281084514,0.141899142,0.064617498,0.201957921,0.138953879,0.078710818,0.235461555,0.327208445,0.068213981,0.168344675,0.057535598,0.070433485,0.175885072,0.011091848,0.013489574,0.013567407,0.052213464,0.050562128,0.006824022,0.027526986,0.031439114,1.691958047,0.387377916,7.382889353,0.835696978,0.430994506,0.184102935,1.798845399,0.407100612,0.093488262,0.19528272,0.077675758,0.069367515,0.071635342,0.157196194,0.535118511,0.036671983,0.085049179,0.047588727,0.062859256,0.075770187,0.029619059,0.063766204,0.038089769,0.013638435,0.011296616,0.007966063,0.094499574,0.019613625,0.032643699,0.010120904
E07000188,2014,0.576647079,0.623296014,0.634240805,0.316645248,0.202108042,0.182014418,0.642561123,1.494915576,0.316927504,0.399009497,0.21938128,0.377299726,0.402731754,0.813711957,0.846275482,0.267170332,0.866768333,0.017980154,0.128087381,0.980361438,1.057520107,0.791218817,1.139144427,0.349768984,0.523373322,0.408648005,0.150061185,0.934777194,0.083513252,2.328567416,0.06514667,0.255294428,0.235899103,1.03655852,0.701799007,0.215873432,1.589643777,0.46783245,0.311281517,0.073820545,0.32599317,0.115835795,0.379958166,0.801201001,0.341286817,0.247923695,0.335153518,0.461833706,0.167248731,0.508234217,0.168141843,0.672381904,0.025428945,0.744926191,0.156512689,0.282361164,0.139733154,0.064158104,0.198427103,0.139593521,0.078070893,0.228374783,0.315410282,0.06922902,0.16717178,0.05772796,0.070534331,0.170735321,0.011265811,0.013273155,0.014055257,0.050814327,0.050444564,0.006439452,0.026917635,0.034388687,1.652814123,0.379913394,7.298543422,0.827554127,0.428615983,0.181738123,1.756269375,0.402030283,0.091503573,0.184138928,0.07549771,0.068755901,0.073770964,0.153193341,0.52071948,0.036379365,0.08397252,0.046851265,0.061865917,0.074622304,0.029312416,0.062449995,0.035860655,0.013285036,0.011239571,0.007899,0.084007535,0.018896367,0.032595189,0.01017315
E07000189,2014,0.583826831,0.624536418,0.638497034,0.324746015,0.200507289,0.184723556,0.643015058,1.544252267,0.321546138,0.403351193,0.223802466,0.382997363,0.399266369,0.82388033,0.862777203,0.267889963,0.875906637,0.01772541,0.12726919,0.995540259,1.062778731,0.806036219,1.161717115,0.360127104,0.528941659,0.415468409,0.148664741,0.956031832,0.082384194,2.373952865,0.065515163,0.256320818,0.242047202,1.042876833,0.711454085,0.217526469,1.611534308,0.480493672,0.314716182,0.076948197,0.338148303,0.11900181,0.383951007,0.833989632,0.344750897,0.248199525,0.336446199,0.460164693,0.167797355,0.512844342,0.168148438,0.687371694,0.024669892,0.751999793,0.159965972,0.292067767,0.142501719,0.063761052,0.189174032,0.139404268,0.08183149,0.235685405,0.327701167,0.070293207,0.163648872,0.057818896,0.071832189,0.171298854,0.011957757,0.012517001,0.013737599,0.052030505,0.051267499,0.006749982,0.027708177,0.034733893,1.670492354,0.369508033,7.279117242,0.811726851,0.411732429,0.178429416,1.743793421,0.393292617,0.090127245,0.179438547,0.073789756,0.064051292,0.071810587,0.152096948,0.504949732,0.035341049,0.081956301,0.045640616,0.060200478,0.07205322,0.029636504,0.060716415,0.036949586,0.013605273,0.010964137,0.007372557,0.096768536,0.018956433,0.032247002,0.009370802
E07000190,2014,0.590717922,0.633423433,0.641271062,0.320561158,0.204217771,0.179114053,0.647230622,1.489288138,0.31927245,0.401458923,0.216288536,0.377108117,0.40910784,0.826923145,0.861090279,0.265654829,0.87176232,0.018484434,0.130706367,0.993883509,1.071246114,0.779338002,1.142866097,0.34462101,0.5234413,0.414775402,0.151864195,0.942468558,0.083545932,2.342566188,0.066277757,0.258455976,0.233057133,1.036403665,0.707027237,0.217256229,1.639560085,0.464800627,0.311593408,0.085490931,0.324103678,0.113910973,0.383572814,0.811596299,0.352675796,0.249431437,0.335856928,0.475450173,0.171712382,0.518617393,0.170394936,0.681272598,0.025417778,0.744958367,0.15470624,0.285111118,0.137903489,0.065162821,0.213557442,0.141512041,0.076845382,0.225375916,0.291936352,0.068649094,0.171748194,0.055652086,0.071661506,0.175725669,0.01149075,0.013156079,0.014191905,0.050637514,0.052095344,0.006914821,0.028955804,0.033093376,1.671663643,0.407327631,7.569612909,0.869279095,0.459513245,0.192121629,1.832730482,0.474425956,0.089353126,0.204817174,0.080533042,0.07375806,0.07573264,0.157609851,0.547523609,0.036268626,0.082967305,0.046041037,0.061162787,0.073468835,0.030941556,0.067661718,0.039515456,0.015697686,0.01111686,0.008037793,0.093242019,0.019492215,0.031492289,0.009745043
E07000191,2014,0.639922987,0.653077641,0.670951107,0.348768142,0.229993817,0.211673904,0.694167145,1.568346529,0.331064165,0.43559899,0.244345985,0.423796295,0.432907011,0.782399632,0.889162272,0.289228252,0.941489412,0.018292471,0.125353509,1.039949655,1.095818779,0.87771257,1.219286453,0.400125484,0.582370458,0.423353704,0.168595388,1.020771555,0.079871061,2.537964405,0.061767972,0.265234043,0.269200233,1.073635905,0.696383413,0.234332265,1.693669159,0.515081118,0.332271836,0.060589574,0.350752281,0.131081214,0.423673737,0.879445222,0.327262425,0.27439441,0.362523214,0.454584137,0.179995682,0.551129727,0.162338125,0.73002901,0.025782311,0.762949479,0.158709047,0.295393102,0.163858952,0.068043935,0.172659379,0.157913331,0.092175043,0.268870267,0.323572422,0.080976873,0.155687686,0.062003244,0.080884024,0.167229097,0.012754624,0.012368433,0.013106171,0.059498627,0.055541911,0.007548107,0.02624346,0.044611688,1.687152096,0.347163298,7.75821848,0.885372488,0.380046723,0.15404339,1.688773863,0.240942295,0.094663437,0.159512231,0.066071519,0.071364363,0.063928912,0.157989633,0.481699128,0.029061708,0.067140314,0.036660558,0.048903215,0.058442074,0.028098138,0.053224271,0.032536638,0.011774591,0.00880295,0.008487611,0.096222402,0.017525213,0.036518366,0.012469525
E07000192,2014,0.526564219,0.598796426,0.596428226,0.309155645,0.175377891,0.164766311,0.584208895,1.588824666,0.309892236,0.378996451,0.207307668,0.351619986,0.367317307,0.84335143,0.832673279,0.255827244,0.828327754,0.017017696,0.125323555,0.947116654,1.029830221,0.753129634,1.120960288,0.336239222,0.479446212,0.408990306,0.131674416,0.905257641,0.074832458,2.285184162,0.069899803,0.242246296,0.217844369,0.993836957,0.715067832,0.198267168,1.455880478,0.44958206,0.29219749,0.083280885,0.320839927,0.110225376,0.330603163,0.762710532,0.356193004,0.219917534,0.29915903,0.450147188,0.153788239,0.470601267,0.173658037,0.634956358,0.023341517,0.738959195,0.15438102,0.253292988,0.12320704,0.057586585,0.183732227,0.12033427,0.072449545,0.21253179,0.3673357,0.058685375,0.158107864,0.052564602,0.060724102,0.176487266,0.010592093,0.010518191,0.01123575,0.046901874,0.044176466,0.00572883,0.028280777,0.02795903,1.635253422,0.375655052,6.690991311,0.734377199,0.411828876,0.196446592,1.798125914,0.427654464,0.09145071,0.186599274,0.078482648,0.057268002,0.073819255,0.155353244,0.518602662,0.034758541,0.080655953,0.04444003,0.05854605,0.070381929,0.027202571,0.063981812,0.033470779,0.012680354,0.010747624,0.007083358,0.104369445,0.018995442,0.028332158,0.008449405
E07000193,2014,0.513232322,0.574150801,0.586227508,0.291309772,0.182256034,0.16288276,0.596409986,1.379659823,0.297370384,0.363860724,0.197601606,0.331903801,0.368911127,0.795623792,0.783722155,0.246484802,0.787950153,0.016811964,0.126549686,0.906204536,0.991759238,0.718270575,1.059829573,0.313435037,0.467464705,0.374393153,0.132678509,0.842092905,0.083835784,2.119110985,0.063647606,0.239619894,0.21048421,0.979672339,0.665674134,0.201666109,1.40003998,0.412919865,0.289446207,0.089954643,0.304633955,0.106695436,0.347970445,0.740764457,0.328534946,0.228720016,0.304625115,0.443818994,0.156852862,0.459871627,0.16561481,0.617812662,0.025137588,0.681241582,0.157251572,0.279928665,0.121003335,0.058646098,0.178835524,0.119451557,0.068778602,0.202077333,0.316435691,0.059234874,0.17585476,0.058020553,0.062835717,0.15956279,0.009980196,0.013013325,0.016116278,0.045247772,0.045900586,0.005831067,0.025195206,0.02715403,1.531441867,0.368800882,6.591722531,0.720915128,0.403380479,0.181758615,1.698801398,0.446303055,0.087186798,0.180389883,0.075036963,0.05887451,0.070454473,0.141355268,0.50387183,0.03671766,0.08395664,0.047314421,0.062267288,0.074689159,0.028781058,0.061920077,0.033798583,0.011418256,0.011491263,0.006910602,0.089836342,0.018118064,0.027324486,0.007879203
E07000194,2014,0.580277798,0.627590947,0.635705173,0.311904752,0.203141942,0.180042936,0.649712221,1.450087622,0.314236851,0.39255903,0.217892231,0.374225904,0.406191625,0.807553267,0.848260943,0.268489625,0.86596596,0.01962389,0.127850331,0.969641988,1.061570644,0.785821724,1.129106014,0.344615836,0.514734316,0.406884752,0.149432842,0.938197847,0.082907109,2.303346416,0.065360222,0.258709467,0.231102221,1.040492685,0.701854053,0.21178299,1.626868445,0.465957445,0.309812446,0.072559027,0.325500322,0.113626728,0.380474119,0.800444792,0.350896806,0.246701264,0.339815949,0.467042412,0.165701968,0.503055955,0.16970826,0.665349111,0.025275201,0.743465184,0.152332602,0.284992641,0.138928166,0.064002285,0.212669588,0.137431897,0.076678962,0.226102875,0.309830978,0.066029904,0.164735526,0.05572784,0.069879471,0.166862505,0.011196898,0.014724783,0.014370637,0.050476822,0.049962011,0.006534535,0.026351576,0.030788881,1.72130398,0.390126268,7.366302953,0.876158697,0.434244489,0.18149119,1.737413243,0.435168816,0.087693818,0.196656135,0.077435453,0.072357383,0.071412175,0.147131567,0.521198137,0.033924321,0.079012399,0.044139969,0.058153176,0.070042283,0.032627444,0.064328024,0.041009171,0.012482547,0.010516012,0.007690416,0.081573082,0.019504341,0.032015939,0.008273855
E07000195,2014,0.538115552,0.597329291,0.605017538,0.305310656,0.186629685,0.169468719,0.605793446,1.513068269,0.304854336,0.378246719,0.207174256,0.358212157,0.376874687,0.808640834,0.818823311,0.254971958,0.825423621,0.017409524,0.124256833,0.938237338,1.016869425,0.753619092,1.106214022,0.334736964,0.490443852,0.392911622,0.137824091,0.89520593,0.07882919,2.242331016,0.064620863,0.24306166,0.225525896,1.000435523,0.687128956,0.203688248,1.498959282,0.44573553,0.29906427,0.077505633,0.314867729,0.109757911,0.35458094,0.772288704,0.34076033,0.230137653,0.313089704,0.445380405,0.158080911,0.478965319,0.166622569,0.643616589,0.024515334,0.72072306,0.155128804,0.272972169,0.129733522,0.060372259,0.188883804,0.125573555,0.073550204,0.215966593,0.340307469,0.062174969,0.163327331,0.056241976,0.064746989,0.172995395,0.010537279,0.012499299,0.013608449,0.047783574,0.04637607,0.006009155,0.025874924,0.031003132,1.667682515,0.388993175,6.934960053,0.77228576,0.417621928,0.18959894,1.747244546,0.428604168,0.089673656,0.185719647,0.076241166,0.061411091,0.072083629,0.152589691,0.516128494,0.033366122,0.076852676,0.042812158,0.056604342,0.068222436,0.028796898,0.064438418,0.033770391,0.013253118,0.010306117,0.007093163,0.102128583,0.018498894,0.028972536,0.009060672
E07000196,2014,0.567112197,0.612859236,0.633420649,0.30549371,0.201895658,0.181547045,0.643879833,1.43465641,0.313705313,0.389899306,0.217982526,0.371137485,0.400742672,0.807642211,0.832729309,0.26672271,0.847165277,0.018858574,0.129207989,0.968277717,1.049507229,0.787442942,1.126815618,0.344685774,0.514715024,0.400463379,0.148049283,0.922426258,0.088230485,2.290691664,0.063632836,0.255291137,0.234954776,1.047040737,0.697601784,0.213032194,1.579943744,0.463600723,0.308551357,0.06855482,0.328908955,0.115673873,0.383985327,0.799043971,0.333970425,0.248979621,0.33675543,0.460325435,0.166983489,0.499098823,0.16586665,0.665361107,0.025948684,0.739966511,0.153911331,0.295080227,0.136894235,0.065014604,0.199946427,0.137972137,0.079442983,0.225415748,0.316426814,0.068458624,0.172932771,0.059126157,0.0699537,0.164198967,0.010902612,0.01407323,0.015610146,0.050974437,0.050309787,0.006511116,0.025791245,0.029651692,1.63866619,0.371151367,7.140337519,0.811063079,0.411090077,0.174384714,1.699060058,0.408929164,0.08725533,0.181988556,0.072430013,0.071753161,0.070738951,0.144983281,0.509345637,0.032297001,0.074560253,0.041886751,0.055678211,0.066815628,0.030444232,0.062738806,0.036850581,0.011906837,0.009969894,0.007050863,0.089748613,0.017993934,0.029950524,0.008387581
E07000197,2014,0.548448646,0.602292551,0.619029329,0.302853142,0.191026638,0.172564562,0.624789495,1.425443249,0.304615103,0.380292743,0.210347864,0.359943536,0.389453182,0.798030068,0.826227908,0.255339208,0.834435267,0.018088894,0.1262978,0.946485498,1.024050321,0.76721297,1.102648178,0.332210155,0.497473433,0.39935033,0.143711131,0.899191555,0.085111442,2.231548671,0.063831148,0.251049652,0.224210408,1.01648194,0.679408012,0.208751698,1.521092932,0.443082679,0.302084429,0.069072265,0.321216586,0.111221898,0.365291411,0.771194947,0.336634826,0.240792792,0.327042588,0.451758401,0.161644691,0.487996233,0.167631265,0.646393359,0.02518873,0.725926093,0.152122588,0.282457293,0.131918302,0.060618069,0.196755542,0.131979152,0.077021373,0.216742266,0.309636839,0.065626648,0.1718554,0.05627372,0.06738629,0.162734169,0.010952913,0.013426343,0.014797011,0.048125647,0.04944171,0.006207318,0.026838459,0.031432055,1.630069575,0.398455489,7.020357602,0.793565006,0.417984347,0.179231476,1.674378492,0.459741313,0.08640978,0.183140137,0.074262329,0.06270157,0.071820615,0.144084113,0.501351027,0.033048066,0.076436526,0.042583882,0.05639998,0.067805059,0.029809465,0.062114322,0.035526794,0.012146425,0.010206542,0.006862342,0.089792667,0.018599909,0.029478589,0.008046251
E07000198,2014,0.572369835,0.621904071,0.633173308,0.310234474,0.201533229,0.181694688,0.641966354,1.465906916,0.314687825,0.393215378,0.217941535,0.375246016,0.402775103,0.804660782,0.841553157,0.265170153,0.857142878,0.018182165,0.127873869,0.971511264,1.048198879,0.786371459,1.129091632,0.346854191,0.517573957,0.404388832,0.151310336,0.933688532,0.08472205,2.301960193,0.063149319,0.254401961,0.233457783,1.03845135,0.693971366,0.212950542,1.618248001,0.463792247,0.306925469,0.069140773,0.323856497,0.114917735,0.380502669,0.812766083,0.337745461,0.248324207,0.337322262,0.459116457,0.167185076,0.506402018,0.16551723,0.667508378,0.025132186,0.753255766,0.151219235,0.288758234,0.138857712,0.064556082,0.204443044,0.140109916,0.077910836,0.226751144,0.302572456,0.068798753,0.167121218,0.056946932,0.07038729,0.166840493,0.011302094,0.013462257,0.014627091,0.050433817,0.050657426,0.006551133,0.026201613,0.034322438,1.661960374,0.375025391,7.282871834,0.844098253,0.425064981,0.176019055,1.719158707,0.412552248,0.089318148,0.185791169,0.074598945,0.071459605,0.07121703,0.149520584,0.516537895,0.033461509,0.07680113,0.043053632,0.057119618,0.06904045,0.030254199,0.060690676,0.036141024,0.01279196,0.010322743,0.007573279,0.074725825,0.018832571,0.031846558,0.009399777
E07000199,2014,0.529634854,0.599629714,0.592733575,0.297180654,0.176242468,0.163890005,0.588311747,1.512791834,0.302919646,0.371786501,0.200543444,0.354430151,0.372778114,0.805566769,0.813148262,0.250451726,0.821701716,0.017447975,0.122266964,0.920784752,1.014187328,0.728869884,1.079052655,0.325797394,0.474871699,0.396990914,0.135022907,0.890526869,0.075497508,2.197507288,0.066061159,0.23923346,0.213987241,0.981865164,0.682414376,0.19640067,1.447503764,0.433958765,0.289498468,0.075926914,0.306021304,0.106640027,0.337297166,0.739050884,0.344212224,0.22071475,0.303083902,0.444883838,0.154485525,0.469132396,0.169847311,0.618736591,0.023643324,0.723267403,0.145554151,0.243972699,0.122211539,0.059292994,0.191317676,0.122972957,0.065279475,0.205612092,0.322620369,0.057759418,0.156894677,0.052573324,0.059762104,0.173100077,0.010043037,0.011841928,0.011776763,0.045946002,0.043514087,0.005591694,0.02624237,0.028976438,1.584573199,0.3981223,6.759575712,0.764711031,0.430325188,0.194013971,1.773574682,0.432574313,0.092454389,0.193880499,0.079772911,0.058945307,0.074591938,0.1489946,0.537105714,0.03749673,0.086663003,0.048147397,0.062989404,0.076096238,0.027300015,0.063366278,0.034650344,0.013891537,0.011585619,0.007863315,0.088976011,0.019203292,0.029999866,0.009266322
E07000200,2014,0.582431483,0.625685313,0.636054961,0.320850324,0.201827379,0.183800012,0.644696785,1.512658656,0.320451363,0.401954302,0.222469225,0.380262678,0.401262971,0.816075896,0.860919993,0.266172691,0.864494447,0.018868027,0.127726782,0.988807388,1.069083227,0.804477916,1.152375057,0.359005795,0.520886782,0.4119432,0.151354549,0.957338743,0.082798121,2.362902646,0.065885141,0.256881068,0.241741636,1.04282621,0.709135493,0.215226313,1.598632737,0.476156827,0.31231923,0.072617306,0.336530546,0.118342954,0.386785342,0.800819918,0.342564539,0.247870751,0.334393068,0.463556462,0.168249024,0.509539657,0.169594453,0.685853559,0.024490015,0.738346295,0.160574373,0.289258655,0.142010155,0.062954885,0.193262363,0.138776484,0.08106272,0.232556138,0.320668339,0.069001271,0.167270299,0.057921503,0.070625468,0.166520647,0.011654191,0.01334194,0.01413173,0.05239415,0.050388591,0.007158897,0.026608358,0.029612187,1.639998124,0.358272146,7.170614891,0.813704374,0.400705789,0.170041453,1.68896734,0.38567044,0.086175656,0.179618854,0.072022635,0.06466044,0.068447023,0.147255507,0.496362165,0.035707135,0.082659463,0.046876637,0.062114519,0.074358236,0.028688709,0.059721961,0.037244278,0.013828315,0.011044661,0.007100818,0.098055809,0.018782019,0.030982861,0.008648797
E07000201,2014,0.514270053,0.579217524,0.583106467,0.291123841,0.175824924,0.160134418,0.587356419,1.43248497,0.295967554,0.361453254,0.195572567,0.330172332,0.367076547,0.788199187,0.784077888,0.244060536,0.800543985,0.015046325,0.121196478,0.897174939,0.977223095,0.700036799,1.043271423,0.308411893,0.467835855,0.377857969,0.131746949,0.840197225,0.080207158,2.072200747,0.061292327,0.235378627,0.201726581,0.964483866,0.647708943,0.199227246,1.398055363,0.4078768,0.285069059,0.094722601,0.29226289,0.105061864,0.330476267,0.779164682,0.328523407,0.222891194,0.305622414,0.436190951,0.152690193,0.463830392,0.159783796,0.599398081,0.023758829,0.709734571,0.147892959,0.249786863,0.117374859,0.057672687,0.180536969,0.119371912,0.064203216,0.198342905,0.297491818,0.061016366,0.163874883,0.053016861,0.062171756,0.16834815,0.010245759,0.010798836,0.013368954,0.043557867,0.045574872,0.005489078,0.02804352,0.033222101,1.571405917,0.405683937,6.810774414,0.755798385,0.434391871,0.19960369,1.780680219,0.473676631,0.094221671,0.191909835,0.081841116,0.058071219,0.076365782,0.148775614,0.541431395,0.03399586,0.078312031,0.042055798,0.055496032,0.066254654,0.029051104,0.065431939,0.031031069,0.011385527,0.010940989,0.008144207,0.073594962,0.017400331,0.030096256,0.009940067
E07000202,2014,0.48594587,0.557537764,0.562713761,0.288564846,0.173352881,0.151454185,0.569630747,1.368031899,0.288139175,0.354140493,0.188840153,0.304941792,0.353638173,0.793545921,0.74947277,0.234374619,0.752999588,0.015260695,0.127194815,0.869302444,0.967568701,0.675855542,1.014866976,0.292220842,0.449173795,0.362549951,0.121277216,0.817133902,0.08162101,2.015482308,0.065199024,0.231345889,0.195590429,0.943767003,0.644216128,0.194624156,1.318194547,0.387806611,0.27947994,0.101294485,0.284941359,0.105250187,0.337487926,0.705443514,0.319145499,0.220196126,0.293787218,0.444635365,0.149767944,0.446950291,0.167813745,0.582816876,0.024772669,0.661423149,0.154681567,0.27237942,0.114480089,0.055668919,0.170064319,0.112559465,0.063711003,0.187388314,0.312494706,0.056865718,0.190786483,0.059664796,0.060537231,0.159632267,0.008987964,0.013043274,0.014411682,0.041173024,0.045604981,0.004982959,0.024885922,0.027158228,1.526176672,0.404067631,6.528009283,0.707264702,0.430594592,0.201371391,1.770154683,0.492206599,0.089706568,0.191061254,0.081174725,0.067411999,0.078351737,0.14510048,0.532872037,0.036259591,0.082948217,0.045590806,0.060045848,0.071646155,0.030980183,0.064736604,0.028843175,0.012768645,0.011356165,0.007437019,0.07821039,0.017649945,0.027759211,0.008123595
E07000203,2014,0.577645882,0.625541956,0.630144602,0.322689518,0.200750386,0.184923048,0.642081565,1.548004331,0.316863213,0.402597587,0.221628796,0.381569047,0.400637095,0.807220047,0.842438693,0.269162714,0.873121205,0.018270093,0.125621614,0.979426475,1.06393781,0.800950022,1.144541974,0.358263929,0.520873416,0.412390171,0.151108893,0.950172822,0.08094798,2.346145373,0.065398812,0.255185219,0.238517933,1.03747343,0.704256572,0.214664912,1.594138867,0.475322042,0.308870889,0.073323921,0.329906805,0.117469864,0.377506822,0.795448122,0.341840145,0.246706044,0.33097448,0.459552479,0.165258619,0.505105814,0.168957444,0.671098746,0.02446001,0.749800352,0.159875464,0.276496511,0.14134541,0.064644859,0.190452164,0.135748108,0.079943332,0.232096624,0.320737929,0.068054489,0.161330485,0.05754975,0.069871596,0.168860476,0.01097961,0.012387005,0.013218606,0.052525773,0.04834426,0.006474002,0.026278472,0.032834944,1.65449106,0.353024727,7.217785417,0.81255171,0.40855125,0.171892073,1.75086645,0.343620583,0.091237865,0.178517382,0.072557052,0.068876767,0.069068539,0.156705476,0.510555611,0.03631419,0.083906393,0.047063697,0.062343707,0.075045444,0.027988418,0.058681045,0.03594031,0.012424418,0.01115218,0.008054198,0.094273341,0.01871914,0.033413361,0.010080616
E07000204,2014,0.55437124,0.608909619,0.615854432,0.310299065,0.188105794,0.171336765,0.610641879,1.47413333,0.313039197,0.383859488,0.210119176,0.35866509,0.383094313,0.812278099,0.835708025,0.258056946,0.837951286,0.016925564,0.124762603,0.957999667,1.031917167,0.756972093,1.107890734,0.33593686,0.500409517,0.402573096,0.140720146,0.911390739,0.078928105,2.258855757,0.064549498,0.247550971,0.223326806,1.003455061,0.696309373,0.20608341,1.550473698,0.447990815,0.300329063,0.082878368,0.31880104,0.111323055,0.357017732,0.800756512,0.34134,0.235420853,0.320420443,0.451231065,0.160873712,0.490328738,0.165037863,0.653992232,0.024060286,0.740220969,0.149853013,0.271915366,0.131375865,0.061511357,0.200534612,0.133394105,0.074551414,0.21641655,0.308360831,0.06514257,0.161124361,0.052913842,0.066556266,0.172760767,0.011451995,0.011970793,0.01277861,0.04858795,0.04881088,0.006288374,0.027837192,0.031766237,1.623374611,0.391646394,7.074140811,0.794116984,0.431278193,0.190774625,1.75135917,0.452378434,0.08838053,0.190842969,0.078416438,0.063940273,0.074170901,0.147940258,0.525856776,0.035241934,0.081566261,0.045250478,0.059919566,0.071767439,0.029218519,0.063832417,0.035395491,0.013817328,0.01089199,0.007410506,0.087138923,0.019048935,0.03069958,0.009213082
E07000205,2014,0.601935638,0.629703008,0.645554303,0.328612783,0.211702437,0.189835605,0.661875055,1.50887638,0.31914187,0.4114977,0.226995515,0.388758983,0.411349791,0.805631257,0.856234364,0.27279582,0.883093114,0.019646028,0.127177867,0.998998674,1.073325841,0.816137305,1.158608185,0.363629068,0.536529953,0.416026631,0.155257302,0.965957983,0.083207647,2.391060094,0.064411542,0.261263292,0.245406604,1.047149611,0.701139376,0.219890236,1.654870819,0.48520045,0.315817377,0.071676643,0.336682305,0.119027803,0.396006847,0.806516432,0.341617613,0.256274593,0.342698,0.466991193,0.170883411,0.521783277,0.166959652,0.693446643,0.02501294,0.738998201,0.1619288,0.291559713,0.148376726,0.065421775,0.200366923,0.143307757,0.08366664,0.240752983,0.303187055,0.072562949,0.162904515,0.057507523,0.074654044,0.163362753,0.011486001,0.013764687,0.014179032,0.054235105,0.052217474,0.007056238,0.026620962,0.033977927,1.677480283,0.357535348,7.430481141,0.85124439,0.412476672,0.168095416,1.721024271,0.367300778,0.087912496,0.184410544,0.071728966,0.074447098,0.068508338,0.150191831,0.501426615,0.034698544,0.079663765,0.045120923,0.059903291,0.071856883,0.030147332,0.060810933,0.037660106,0.012793615,0.010721401,0.007625502,0.0882254,0.018897719,0.03376411,0.009914633
E07000206,2014,0.575034481,0.605291149,0.621910851,0.323542819,0.196063269,0.182277606,0.620908821,1.558323457,0.31560357,0.398850969,0.222243194,0.379657765,0.384009002,0.801406654,0.845754761,0.264544053,0.854348075,0.017869873,0.123014208,0.974996543,1.038670322,0.799981169,1.145043529,0.361874938,0.518754646,0.407573132,0.143720711,0.951390199,0.076948024,2.371024273,0.065147539,0.248175877,0.242641718,1.014352178,0.697506358,0.21086035,1.551125629,0.479166378,0.310272139,0.072461235,0.33406221,0.11800275,0.375913508,0.801933846,0.331406575,0.240980823,0.323362997,0.440665891,0.162994404,0.497641325,0.162290431,0.679770828,0.024362313,0.717942014,0.157895424,0.277511231,0.141879325,0.061581825,0.17763302,0.138297141,0.083626487,0.236286947,0.336902592,0.06998268,0.153613176,0.055242647,0.070235349,0.163405613,0.011826564,0.011807739,0.012278129,0.052956877,0.049376555,0.006683157,0.025823717,0.032791754,1.585421365,0.344306828,6.944461785,0.761641904,0.374685961,0.169135974,1.656534775,0.330580984,0.08507575,0.166172741,0.068164042,0.058139001,0.066665534,0.145091012,0.472601607,0.03361162,0.077661667,0.043285036,0.057160262,0.068614276,0.027443651,0.057139709,0.034035852,0.013106442,0.010408123,0.006896288,0.097617938,0.018046214,0.030923718,0.00940981
E07000207,2014,0.586528726,0.629649512,0.628634271,0.307696677,0.216625217,0.17622531,0.671685963,1.32839415,0.316331022,0.406103489,0.206154798,0.355829378,0.417677971,0.801633401,0.826236198,0.266469537,0.860099369,0.022115648,0.134569107,0.955531191,1.089154211,0.750066258,1.092548942,0.321930818,0.502470141,0.402278808,0.146604692,0.886000138,0.092934722,2.216965231,0.069319705,0.261015488,0.213464607,1.043349354,0.688757742,0.21589364,1.570680081,0.437313596,0.300967192,0.089765232,0.3124321,0.11142771,0.373416867,0.713029181,0.347776148,0.250426599,0.339130583,0.503213163,0.167112694,0.505043922,0.180966336,0.647882363,0.025134511,0.700057783,0.168328076,0.266404428,0.132883728,0.063236789,0.213883931,0.128433018,0.070063107,0.216671283,0.260799354,0.064332828,0.185442522,0.057513405,0.071313833,0.155910508,0.00898082,0.016641943,0.017314926,0.051057166,0.046002322,0.005388639,0.025060584,0.024275156,1.586613983,0.402364874,7.542290239,0.852424245,0.470006066,0.182468795,1.823452743,0.476469554,0.091620388,0.238414713,0.083701293,0.101468065,0.071816176,0.143173432,0.566797645,0.041479741,0.095813432,0.05260933,0.069665965,0.083167087,0.032195432,0.068571926,0.03815914,0.009426233,0.01300947,0.008658784,0.071218808,0.020249486,0.033906732,0.009370162
E07000208,2014,0.59023787,0.632096436,0.633192471,0.310955172,0.21424185,0.170978418,0.662790877,1.309605481,0.311224648,0.395228449,0.202436271,0.355442402,0.419244356,0.795471244,0.81243639,0.261490819,0.853134914,0.0198001,0.133040153,0.944898372,1.06934133,0.736006385,1.080388597,0.316181974,0.500810496,0.389631964,0.14896285,0.900572428,0.091566462,2.17163556,0.064367653,0.257153472,0.213329149,1.031735248,0.676315319,0.213906584,1.612591775,0.435143171,0.302157017,0.091079187,0.30291912,0.10952195,0.375826189,0.755226076,0.344639042,0.251014519,0.344707583,0.498632447,0.168623801,0.50659871,0.178510672,0.641279542,0.025459167,0.702319302,0.1548451,0.29350869,0.134322686,0.064738081,0.23036206,0.134785394,0.073721303,0.210156756,0.250484325,0.06510102,0.190330912,0.059978328,0.070471153,0.160008684,0.009890049,0.013798588,0.016267929,0.049175206,0.051553587,0.005764357,0.025962721,0.026671537,1.675734286,0.452034662,7.753935871,0.930751739,0.511455481,0.198466778,1.882497549,0.540113377,0.090387681,0.239201532,0.086035484,0.099711019,0.077626212,0.156717206,0.583041098,0.039013995,0.08996506,0.049587878,0.065377553,0.078560859,0.032523537,0.070381221,0.039479224,0.01151286,0.012196077,0.008592869,0.064086024,0.019214908,0.032060948,0.009609029
E07000209,2014,0.569348768,0.620624715,0.623226864,0.309705293,0.20876052,0.170833055,0.653837965,1.398583997,0.305823125,0.384917312,0.201364433,0.351842143,0.410580428,0.805138154,0.803547627,0.258814771,0.836128548,0.02120214,0.13201657,0.927977977,1.057474445,0.735374918,1.082274669,0.317605773,0.49013932,0.387998613,0.144017127,0.88044559,0.088263746,2.176858518,0.065157796,0.255106698,0.216913988,1.011915631,0.673896478,0.212167055,1.570726949,0.431801353,0.300244675,0.085404145,0.302974655,0.108477738,0.367044945,0.738749187,0.347080931,0.244558281,0.332447769,0.486906987,0.164473601,0.490783694,0.177475421,0.635575893,0.026223297,0.710996504,0.160028061,0.275366877,0.133348825,0.062611251,0.219640561,0.129087559,0.072772165,0.210161533,0.290268346,0.061922672,0.178699634,0.058563725,0.068399322,0.162382622,0.009051491,0.01468296,0.016499031,0.048370205,0.047360222,0.005676523,0.02448969,0.02574512,1.754414882,0.460853654,7.761349293,0.899331103,0.506733771,0.206403861,1.906995065,0.521236545,0.094299493,0.253669616,0.088301777,0.099578073,0.078887745,0.172537052,0.602128837,0.036352593,0.083743874,0.04626577,0.061392401,0.073550842,0.032476347,0.072528131,0.038718427,0.016399313,0.011365979,0.008691585,0.067969315,0.020088504,0.031951107,0.009355695
E07000210,2014,0.601667557,0.637555008,0.648430077,0.321549214,0.218813331,0.185402823,0.681546521,1.415896913,0.31914455,0.411117023,0.22109164,0.380655739,0.421297648,0.812507568,0.859847609,0.275306207,0.88704108,0.021031327,0.134263852,0.990670517,1.090795865,0.804789991,1.153160555,0.348952609,0.530489966,0.411983202,0.156449312,0.94091459,0.090780396,2.346644608,0.066422583,0.266060037,0.233337726,1.069895526,0.705393755,0.221947478,1.666708338,0.468062777,0.315382881,0.075833875,0.335757138,0.116413882,0.392786132,0.787359954,0.354654675,0.258114949,0.353628048,0.491625711,0.172981994,0.522062561,0.178135543,0.686340459,0.024931537,0.731016783,0.163124074,0.296219574,0.143507182,0.064979911,0.217829637,0.140147438,0.079052128,0.233524493,0.289743072,0.069890982,0.174766145,0.058261268,0.073759895,0.16395174,0.01074712,0.014013506,0.016225698,0.052531743,0.051477514,0.006075287,0.026234937,0.031469014,1.674951786,0.401585138,7.676234951,0.887973077,0.445067279,0.174746098,1.767976318,0.455746991,0.090797592,0.214624767,0.07876702,0.090284441,0.069618061,0.145381247,0.537620205,0.037783943,0.087556174,0.049339145,0.065097242,0.078754871,0.031025285,0.065200736,0.040124229,0.010990859,0.011653141,0.007852912,0.073357454,0.018973255,0.032672634,0.009309169
E07000211,2014,0.575442088,0.629667348,0.632096411,0.309524213,0.212086771,0.171970367,0.660490382,1.322075267,0.311870104,0.387607606,0.200253474,0.355418168,0.415638877,0.797348542,0.815208959,0.260788522,0.839937757,0.020797144,0.134871379,0.936624171,1.066876684,0.734857629,1.084159162,0.315832513,0.492209105,0.383789774,0.145909753,0.873385997,0.094886256,2.177272317,0.065557725,0.258944239,0.21193187,1.036541316,0.678132399,0.211984174,1.588280251,0.422781764,0.302960236,0.093275459,0.303107777,0.10888748,0.380279431,0.751579305,0.345611716,0.249280847,0.340487432,0.49607695,0.169825214,0.494519753,0.17649989,0.64260756,0.025893402,0.709002198,0.156290542,0.27892204,0.129861154,0.066368409,0.231381364,0.13210404,0.071387097,0.210469382,0.266209237,0.062813511,0.191309316,0.056703267,0.069280057,0.157130765,0.009291144,0.014423911,0.018268423,0.048909857,0.046648332,0.00577214,0.024399124,0.024872143,1.627955259,0.434453628,7.680412034,0.905242787,0.48936362,0.188909636,1.856540067,0.527036677,0.091198923,0.241999799,0.085664188,0.095969107,0.074383383,0.141091747,0.582984415,0.038515152,0.089131636,0.049004712,0.065015576,0.07770282,0.03277098,0.070586212,0.038404384,0.010873327,0.012055339,0.008339804,0.067485983,0.01900005,0.032193871,0.008711009
E07000212,2014,0.557152012,0.612325466,0.618927639,0.306471672,0.203507025,0.171240897,0.647047498,1.394552712,0.304434279,0.38344958,0.202442528,0.345681339,0.403106848,0.806967827,0.798878727,0.255184605,0.82861186,0.019606006,0.134838443,0.929197808,1.042512755,0.734984091,1.088081162,0.316747977,0.486939809,0.389012746,0.144908262,0.864072771,0.091153174,2.17743779,0.06470035,0.252087541,0.219103855,1.024387259,0.674732736,0.213735367,1.524902105,0.425567149,0.302734406,0.094909776,0.305980949,0.110347737,0.376056298,0.738879835,0.339489648,0.244139809,0.327608552,0.481994417,0.168113548,0.487586205,0.175012565,0.636734267,0.026659188,0.705878361,0.16321437,0.276653618,0.130108053,0.064256752,0.207189632,0.125881381,0.072924634,0.209773815,0.298479433,0.063703595,0.185307762,0.060036723,0.068533799,0.157458925,0.009691948,0.016779778,0.017080479,0.048934955,0.047425596,0.005724573,0.025378733,0.025390376,1.700690793,0.446905479,7.4620978,0.841923792,0.48129217,0.197750908,1.828074302,0.516815818,0.090664515,0.22377886,0.08390105,0.091775204,0.074464049,0.162528699,0.566081162,0.033848839,0.078078037,0.042794407,0.056449266,0.067922822,0.034910254,0.069071847,0.036789483,0.012408953,0.010718085,0.007816249,0.081561182,0.019918618,0.02956683,0.008849566
E07000213,2014,0.54505044,0.609156502,0.63104456,0.297122202,0.21224441,0.171789659,0.668049457,1.257559452,0.30472601,0.375670627,0.196868711,0.325202014,0.41580493,0.796699636,0.782486305,0.253410303,0.797174065,0.019521967,0.140661944,0.916482889,1.043649218,0.723405891,1.060369196,0.303985086,0.485506443,0.357644495,0.148034165,0.825808927,0.104907545,2.057904665,0.06171042,0.258167479,0.214555948,1.032847173,0.652736151,0.219604984,1.468034799,0.397979242,0.306866367,0.104514283,0.29523478,0.108912255,0.402580366,0.734166186,0.325694641,0.25710434,0.345961816,0.488031496,0.177799233,0.485715142,0.173314784,0.633361048,0.029576483,0.673958703,0.167811537,0.317069721,0.130308294,0.067652462,0.2033073,0.131714042,0.069490929,0.204842408,0.274382872,0.063676226,0.215043717,0.06800164,0.072167739,0.144504989,0.009035351,0.01538446,0.024964159,0.046577981,0.050354861,0.006332179,0.023533421,0.024573613,1.57116519,0.407464812,7.336799645,0.837285345,0.457998329,0.180634271,1.802858313,0.531168213,0.089894508,0.21836238,0.080961323,0.083765801,0.074043735,0.139487111,0.568955735,0.034730779,0.081110327,0.044126516,0.058607496,0.069888438,0.032612753,0.067298596,0.034150907,0.011118267,0.010938185,0.007845838,0.066115049,0.018540286,0.029699989,0.007733336
E07000214,2014,0.597652951,0.646899348,0.644907357,0.310155583,0.213646168,0.176414068,0.670158349,1.323813089,0.317756511,0.398335579,0.207009965,0.366332012,0.426053895,0.805108894,0.831130736,0.267716247,0.871991608,0.020775621,0.132932486,0.964918639,1.083574727,0.756098573,1.102547419,0.323083124,0.512501495,0.404160985,0.152749034,0.905151973,0.091854979,2.228317814,0.065586709,0.263029212,0.218256065,1.049136042,0.694331979,0.215027302,1.640920674,0.444350352,0.307042704,0.082205442,0.309742349,0.11015198,0.379165647,0.7765381,0.353397772,0.253830103,0.34595372,0.504393923,0.170332493,0.512821547,0.178493196,0.655182122,0.02650337,0.746008814,0.151073977,0.277504417,0.134391017,0.066375693,0.243912893,0.138353934,0.070965036,0.215149308,0.25752347,0.065818987,0.185795619,0.057422607,0.070832988,0.164493658,0.01001622,0.014187094,0.016321298,0.049553653,0.050745914,0.006220608,0.026935212,0.028408625,1.694013747,0.441717294,7.819433144,0.945394474,0.503944124,0.192158619,1.863819444,0.528631677,0.091043285,0.23413419,0.085956685,0.094289353,0.077519838,0.156315846,0.587515276,0.038981305,0.090622126,0.050600276,0.067299485,0.08096971,0.033430932,0.071780213,0.043259092,0.011397469,0.012182689,0.009011296,0.064768777,0.020114525,0.033389374,0.008983927
E07000215,2014,0.591931916,0.638908153,0.634668166,0.315354799,0.214509432,0.183992552,0.673575462,1.414203651,0.313747189,0.407266498,0.212436209,0.374088634,0.424095365,0.792103959,0.825331376,0.272083116,0.880847506,0.019247406,0.129990232,0.970895804,1.083004819,0.771861431,1.121836595,0.338390774,0.520027573,0.39830372,0.153495186,0.910816917,0.087331022,2.255627142,0.063335608,0.264109705,0.227828253,1.045402614,0.686971314,0.221159167,1.595865553,0.458584229,0.308194053,0.080396338,0.308411079,0.112298487,0.383122516,0.75584219,0.341895103,0.255309115,0.342185294,0.488537688,0.172054945,0.512206521,0.176477592,0.652933033,0.02549433,0.729569739,0.158354468,0.272519726,0.139200797,0.069113792,0.220313092,0.136751514,0.074672931,0.22459602,0.275487776,0.069380294,0.177600441,0.06024102,0.072572103,0.163145193,0.010017485,0.0137782,0.015630447,0.051771422,0.048938138,0.006103391,0.026195758,0.030423411,1.643129909,0.401460383,7.576085175,0.872482416,0.461622967,0.179720381,1.853262202,0.411247493,0.094779272,0.208375757,0.079260423,0.08280399,0.073134975,0.161242272,0.56800713,0.037268295,0.086672676,0.048019623,0.063688705,0.076513981,0.029918835,0.067744308,0.040846223,0.010424138,0.01153292,0.009467956,0.066658978,0.019133504,0.035563135,0.010463937
E07000216,2014,0.608191614,0.643065416,0.646463367,0.316224174,0.223568554,0.184524862,0.685104552,1.334799245,0.319932808,0.408958205,0.213428086,0.376452704,0.428614137,0.790484744,0.84057087,0.274347314,0.881409914,0.021920256,0.133935815,0.975849126,1.090048305,0.779360625,1.121097881,0.338441608,0.523064313,0.405395108,0.155706512,0.922511299,0.093455513,2.288012286,0.065612963,0.265999642,0.227347908,1.054083254,0.690429015,0.220904912,1.655558695,0.454579072,0.312335926,0.0825352,0.323592447,0.113560651,0.396803622,0.768359561,0.347803726,0.259742975,0.351496032,0.500363638,0.173335072,0.521656961,0.175746652,0.672097982,0.025854458,0.722605243,0.160733901,0.288044486,0.141465078,0.066973185,0.22587757,0.140802145,0.075603776,0.226443076,0.259533591,0.068105263,0.18158852,0.058187807,0.073987253,0.16001863,0.009859792,0.01490395,0.017047011,0.052304973,0.049505283,0.006394192,0.02467556,0.029298437,1.648473646,0.401993333,7.761679601,0.909883258,0.467483484,0.176731765,1.792995496,0.466976618,0.090225985,0.226854885,0.080718317,0.09274287,0.069548614,0.1459243,0.560029355,0.039807675,0.092346938,0.051565093,0.067587707,0.081834854,0.031422039,0.066567739,0.041314667,0.010249296,0.012300879,0.00840569,0.078456644,0.020025285,0.034491913,0.009856159
E07000217,2014,0.544907139,0.604277631,0.611835148,0.300725395,0.203342188,0.165117673,0.648000545,1.326433448,0.302590079,0.376209578,0.19399068,0.329964335,0.40345323,0.797813346,0.77906019,0.251035653,0.805579531,0.0201016,0.135909658,0.902872867,1.042292616,0.710303025,1.052192753,0.302657118,0.474555849,0.368531251,0.1408594,0.839447611,0.095069061,2.067600726,0.064734391,0.251328033,0.20430596,1.01715288,0.661601469,0.21134332,1.472056287,0.399385739,0.297598413,0.109515805,0.296236052,0.107288168,0.367866308,0.713357448,0.336369005,0.243408093,0.330962733,0.487398561,0.164699912,0.475314589,0.178609072,0.617241891,0.026511516,0.686386379,0.167714313,0.287985609,0.125140519,0.063124759,0.210043992,0.124425708,0.067097216,0.201402879,0.282151698,0.059979559,0.198025913,0.062032917,0.067587026,0.150526872,0.008711252,0.013574806,0.02029138,0.046286597,0.04690241,0.005361941,0.023551916,0.022212679,1.619268334,0.428252556,7.301137481,0.833041648,0.475045825,0.191510888,1.855866133,0.53691095,0.090971753,0.238506671,0.085207361,0.086070319,0.074831361,0.145586695,0.584707317,0.038091292,0.086589872,0.04750342,0.062429029,0.074661228,0.031256573,0.069083087,0.036355683,0.010948021,0.011909983,0.008282894,0.0665554,0.019171414,0.029926597,0.008577672
E07000218,2014,0.565613185,0.607774235,0.616909413,0.301847747,0.194621598,0.177861064,0.626911408,1.456434591,0.305554455,0.390475391,0.209022165,0.363681431,0.393975921,0.812601025,0.811416395,0.260141868,0.841595519,0.018096936,0.12971148,0.952651394,1.035622059,0.748430266,1.104263003,0.331869225,0.502365017,0.401696014,0.148729748,0.906626133,0.082234147,2.254322207,0.066120449,0.245804039,0.226488927,1.036180465,0.688053616,0.204787723,1.603729979,0.452315363,0.299219942,0.08655459,0.316610526,0.113097366,0.374994626,0.78780255,0.33708147,0.234820045,0.316017089,0.462601947,0.164718072,0.495267209,0.16610701,0.646463325,0.024556784,0.745897252,0.147424263,0.261452985,0.127928066,0.063853165,0.213294518,0.131965051,0.075785827,0.216790128,0.30565746,0.065187235,0.166426054,0.054992742,0.066204191,0.174567425,0.010325335,0.018665492,0.012246005,0.049483317,0.048112012,0.006022912,0.02715243,0.03309772,1.676828581,0.398170367,7.225237996,0.843675241,0.438632081,0.186531212,1.77002758,0.428513722,0.089140143,0.191683741,0.07639932,0.091822254,0.072167307,0.158005535,0.538434532,0.033861946,0.079001623,0.043978092,0.057443348,0.069698617,0.032725117,0.065857855,0.03802262,0.013466209,0.010569414,0.007946715,0.075962539,0.018486051,0.029247863,0.009357912
E07000219,2014,0.511154323,0.573467245,0.59034628,0.28872894,0.185684678,0.163568959,0.604411952,1.388361323,0.296834944,0.362715081,0.196407614,0.328687446,0.374578707,0.79758219,0.778695401,0.245917992,0.783297424,0.016796053,0.127694085,0.897653765,0.991813494,0.71333981,1.04976447,0.310925437,0.4672925,0.366449135,0.134738948,0.83459172,0.087769908,2.080777803,0.06402021,0.241570837,0.210627088,0.984598883,0.656463855,0.202870023,1.383235304,0.40839079,0.292761759,0.091379967,0.299937002,0.106651456,0.353684735,0.733717444,0.323123969,0.232360039,0.31072203,0.444011179,0.159548526,0.459614931,0.16549633,0.616084045,0.026338734,0.676014682,0.158637854,0.283200367,0.123335686,0.060932418,0.180256542,0.120196248,0.068094041,0.201960664,0.315409441,0.059417603,0.180326125,0.061033431,0.063783187,0.157948375,0.009444275,0.013703159,0.016916129,0.044925041,0.046485046,0.005673171,0.024384665,0.028722623,1.522735123,0.368357045,6.621587399,0.735440623,0.405328145,0.179940861,1.717827519,0.43705063,0.087067337,0.180002199,0.075004022,0.063403512,0.071253706,0.138827421,0.513104647,0.035421504,0.081892763,0.045177339,0.060086527,0.071664712,0.028776932,0.062315577,0.032606266,0.010922691,0.011147822,0.007196554,0.084517747,0.017367404,0.027605242,0.007754739
E07000220,2014,0.538902877,0.591649926,0.602785318,0.290758655,0.197849319,0.165273911,0.626366529,1.272002894,0.298577776,0.367926661,0.193131209,0.331067522,0.394421798,0.776016403,0.779547152,0.249160045,0.794974024,0.017860747,0.128761385,0.904385004,1.006131471,0.704527646,1.040707451,0.302249659,0.474003146,0.368207508,0.142550152,0.832389591,0.090199069,2.066919203,0.060829257,0.247426162,0.208368036,0.990308651,0.645867155,0.206126284,1.495068236,0.405553634,0.292922994,0.090723489,0.290326755,0.104669731,0.372205257,0.74113459,0.328571357,0.240292704,0.324111453,0.465344255,0.166365682,0.479591384,0.165528088,0.617201437,0.026236573,0.685905101,0.149914983,0.283074789,0.126670991,0.063649809,0.210624886,0.128614798,0.065880084,0.201052206,0.252791752,0.061462191,0.187816889,0.058720953,0.067812501,0.152947966,0.009446986,0.014619361,0.018128384,0.045212352,0.048547699,0.006145678,0.024563247,0.028914559,1.575946139,0.406574845,7.222451122,0.837711163,0.458969623,0.181247257,1.779566136,0.503446584,0.087858023,0.207259459,0.079439585,0.079448486,0.073177054,0.146579742,0.546438494,0.036975921,0.085595051,0.047511964,0.062635729,0.075430056,0.031432359,0.067172377,0.036783502,0.013166735,0.01152482,0.007825291,0.065461696,0.018040168,0.030021661,0.008919976
E07000221,2014,0.595856327,0.631786033,0.640125655,0.314003158,0.211313197,0.186918056,0.657985597,1.407082871,0.31648464,0.405502505,0.219046266,0.379811708,0.413565436,0.790754523,0.842029303,0.270009023,0.878269034,0.019168014,0.128675415,0.981199794,1.058288228,0.789736379,1.136995638,0.351401128,0.529891446,0.406608604,0.157024835,0.939380133,0.08398722,2.323042436,0.063124233,0.256798641,0.233850859,1.048147944,0.691757288,0.216401977,1.649546623,0.467202041,0.308662728,0.073426086,0.326352031,0.115867737,0.387002783,0.816954581,0.338524891,0.251932431,0.343123549,0.470079258,0.169796686,0.516267619,0.166742576,0.677708969,0.02450362,0.74841515,0.15116529,0.277911538,0.142685082,0.065189411,0.207567676,0.142254123,0.078505505,0.231171082,0.281744581,0.070678249,0.164839247,0.056221631,0.072182441,0.166820321,0.011105548,0.013781784,0.013676355,0.051668066,0.051172445,0.006680299,0.02623585,0.034288409,1.649369652,0.393609797,7.484521327,0.875951047,0.429297463,0.170361634,1.708521897,0.404679299,0.08910975,0.190762278,0.073529035,0.083219553,0.068710223,0.149284091,0.520495101,0.033733404,0.078164243,0.044075497,0.058128183,0.070336009,0.031225549,0.061646497,0.037111364,0.011610463,0.010319409,0.00800493,0.080362205,0.018501619,0.032478269,0.009721236
E07000222,2014,0.541374025,0.59562964,0.602989867,0.291950845,0.200495964,0.164999293,0.630400689,1.367326098,0.296257667,0.366452041,0.193067816,0.337682736,0.396565773,0.774752113,0.774467577,0.248654842,0.800376291,0.019199883,0.129714752,0.898702605,1.008493952,0.70580117,1.044272556,0.304686493,0.470745128,0.367760973,0.141519157,0.837631303,0.088279894,2.077537304,0.060876905,0.244342738,0.211712125,0.987631273,0.644452661,0.206399839,1.486891557,0.411161069,0.292487221,0.087053813,0.288112228,0.104705568,0.364763985,0.736810655,0.32723033,0.238700859,0.321708333,0.467834943,0.163310307,0.47411333,0.16576208,0.615729461,0.026822213,0.686156279,0.152433455,0.267561564,0.126599616,0.063081473,0.206610556,0.125632715,0.070483453,0.202609362,0.282282455,0.061155195,0.18051959,0.058399566,0.066504588,0.156572122,0.009060903,0.01395886,0.017715029,0.046442133,0.045843019,0.00573846,0.024404808,0.025715348,1.702088076,0.444433705,7.429509245,0.84574084,0.487850477,0.201587925,1.841749555,0.511393581,0.090758627,0.237485161,0.086737995,0.085830875,0.07577446,0.166387645,0.59268317,0.033020812,0.075730814,0.041513128,0.055048743,0.066321346,0.032604802,0.071247807,0.03553617,0.013372292,0.010254362,0.008356586,0.070736799,0.019099904,0.029884151,0.009843371
E07000223,2014,0.584494627,0.628587187,0.636310175,0.326172182,0.202764881,0.180750718,0.636302777,1.503741659,0.320693802,0.405770035,0.218571708,0.385247405,0.399627073,0.808610058,0.867502932,0.268895149,0.877354744,0.018213124,0.128400378,0.994100108,1.063822745,0.8015202,1.154783618,0.354807488,0.525595063,0.414123324,0.143108255,0.951797684,0.077953501,2.39279538,0.067661376,0.253703798,0.240027002,1.022266328,0.712333683,0.215467222,1.614195871,0.477655188,0.316356038,0.077199329,0.336957209,0.115577452,0.376806349,0.803830793,0.349985409,0.243651836,0.330556991,0.460524509,0.166251959,0.508726909,0.172038304,0.681825727,0.02374279,0.731592954,0.155381179,0.278402414,0.140576931,0.063084945,0.193243078,0.140287238,0.079852687,0.232284692,0.320654205,0.067183811,0.156469037,0.055663271,0.070420968,0.173582714,0.011977449,0.013330159,0.013103579,0.051582362,0.050056144,0.006312437,0.027617545,0.034153944,1.65143232,0.387824295,7.299207829,0.81987506,0.426647151,0.178753461,1.75310869,0.417851514,0.089634494,0.186360964,0.075386032,0.060752259,0.069867867,0.150669135,0.515707667,0.033443619,0.077412329,0.042879444,0.055885216,0.067310298,0.028767258,0.061082554,0.03891012,0.01275244,0.010672557,0.007461156,0.122942636,0.019530422,0.032549392,0.010580014
E07000224,2014,0.606913471,0.637666569,0.650488753,0.332941938,0.212918807,0.189778821,0.654617119,1.514953451,0.325346581,0.416199245,0.228313954,0.395507553,0.411776483,0.809239804,0.876212027,0.273582209,0.896641712,0.017829729,0.128150299,1.019049344,1.070762636,0.821338921,1.17836141,0.368586561,0.548151235,0.421655665,0.156155547,0.982041963,0.0796219,2.441081671,0.064578818,0.259682974,0.245758458,1.043471696,0.709799935,0.223897097,1.675443778,0.487778492,0.320603536,0.075911203,0.340091675,0.119849931,0.392845823,0.864849274,0.344002081,0.256497074,0.343989554,0.459745557,0.17336721,0.532344351,0.164479097,0.711506796,0.024696802,0.74588082,0.154765285,0.290391864,0.148447105,0.065292789,0.192698284,0.149189244,0.084724583,0.24289565,0.304597438,0.074838151,0.156351539,0.05594946,0.075844209,0.175193523,0.012906301,0.012360223,0.012704881,0.054488079,0.054111231,0.007134389,0.027705734,0.041210038,1.655864239,0.383591615,7.564381398,0.860820423,0.416203767,0.177043333,1.74073863,0.392014073,0.087991527,0.181324879,0.073214276,0.065883146,0.069448866,0.15458881,0.508971631,0.031502367,0.072568124,0.039967889,0.052894099,0.063549679,0.02949033,0.059739628,0.03744512,0.013830421,0.009883573,0.007674309,0.091477914,0.018746564,0.033710719,0.011323975
E07000225,2014,0.617229617,0.644474453,0.658593567,0.325993648,0.224970682,0.192924291,0.680268542,1.406032692,0.321832687,0.416242372,0.22440602,0.391208554,0.428525391,0.791567404,0.851696374,0.277902887,0.90247304,0.018642651,0.130221486,1.008609604,1.077453953,0.80675444,1.15792879,0.358169782,0.545868905,0.412732132,0.16576033,0.958171264,0.086851124,2.369319672,0.062368569,0.262886531,0.245274875,1.04910622,0.692900912,0.226224508,1.678685259,0.476140137,0.318586599,0.074998839,0.323452233,0.118247156,0.408167701,0.842895256,0.338273547,0.266610047,0.355715769,0.481627397,0.178664871,0.54135966,0.164934807,0.696715447,0.026732893,0.743650899,0.152355968,0.295577995,0.147277011,0.069485898,0.206668208,0.149497964,0.079153948,0.238742152,0.269114304,0.074677605,0.172181203,0.059642099,0.077562528,0.165753995,0.011524561,0.013788765,0.015168526,0.053383925,0.053484386,0.007615556,0.026248782,0.040291368,1.647478089,0.399560333,7.86168746,0.931855125,0.448536215,0.175469669,1.771322764,0.41014068,0.089738373,0.196127503,0.07487187,0.082545023,0.070980828,0.158544898,0.539213346,0.032686313,0.075577709,0.042208463,0.055425747,0.066701468,0.031044052,0.063966375,0.038092745,0.013389118,0.010085808,0.008148321,0.073391674,0.018590208,0.033962943,0.01112357
E07000226,2014,0.495861392,0.569496849,0.583937667,0.281506401,0.186419162,0.153995148,0.614324447,1.273995639,0.293098302,0.34948938,0.177746272,0.293726434,0.381602297,0.795587038,0.739807176,0.235113008,0.74667551,0.016470329,0.134965894,0.85973872,0.986541234,0.657399205,1.000047498,0.27760744,0.439890989,0.33928938,0.129927752,0.766807841,0.097467419,1.900217136,0.061777515,0.239776162,0.192368527,0.987679026,0.630814542,0.205262174,1.294905302,0.358745503,0.288040988,0.125376415,0.271558835,0.101426245,0.353639288,0.688028279,0.315911186,0.235101646,0.307823204,0.463579904,0.166095195,0.451250238,0.167782087,0.581860536,0.027938278,0.642020321,0.168551482,0.291619003,0.112073592,0.063683016,0.188229015,0.113105139,0.059893524,0.184365391,0.278708477,0.056369353,0.21317599,0.065525381,0.063476449,0.144987719,0.008116904,0.01357376,0.022842683,0.042156179,0.045000245,0.005364713,0.023274906,0.021468117,1.474997213,0.408939527,6.765755684,0.73001851,0.453523085,0.194187267,1.845279682,0.54346719,0.092407581,0.212405711,0.085183432,0.072543722,0.07743712,0.140202249,0.576690991,0.038905038,0.088914786,0.048316648,0.063710386,0.076118168,0.032000612,0.068152047,0.029593418,0.010717449,0.012196797,0.008282479,0.069102721,0.017831777,0.027589377,0.00788221
E07000227,2014,0.594437685,0.639129032,0.650836325,0.318270502,0.214389305,0.184477073,0.675874588,1.436866778,0.320956602,0.407659288,0.219526664,0.378496063,0.419885354,0.825965158,0.856685035,0.272362301,0.880475507,0.020499958,0.134871466,0.99439645,1.091447204,0.798322513,1.150811151,0.349333619,0.527570817,0.411681031,0.154653877,0.949474287,0.090730711,2.343492457,0.066985707,0.263624983,0.235530393,1.070703497,0.70981132,0.220487657,1.653521572,0.466318112,0.316430361,0.081725874,0.335509488,0.11638161,0.39517675,0.787090442,0.354270212,0.255562378,0.348388717,0.49311477,0.173450387,0.520163654,0.177312617,0.681100529,0.025150788,0.73488921,0.167565937,0.299100729,0.1418336,0.065906216,0.217117548,0.138718474,0.079040565,0.230542026,0.29809403,0.06813444,0.180774758,0.059885796,0.07253805,0.164779286,0.010556075,0.015500207,0.016654546,0.052050408,0.051004448,0.006510454,0.026428632,0.029217098,1.672878028,0.389123933,7.546578319,0.876310861,0.445047176,0.178200776,1.791325834,0.454951416,0.090579362,0.209483967,0.079030026,0.086545807,0.07088911,0.14861969,0.5450838,0.037827995,0.086502635,0.048911575,0.064627228,0.07803048,0.031437306,0.066022823,0.039763784,0.01283568,0.011665901,0.007849323,0.084738998,0.019157413,0.031536686,0.008877081
E07000228,2014,0.589514702,0.636053554,0.636952939,0.315533858,0.210377198,0.177573434,0.662777996,1.374841828,0.314895848,0.399855093,0.211905838,0.363675828,0.418680949,0.802167111,0.838262204,0.266426459,0.868920608,0.020112157,0.132423636,0.970455058,1.073673725,0.764785342,1.116729748,0.330826501,0.514529939,0.407083591,0.15329386,0.916063624,0.087071173,2.267861476,0.065609191,0.262117417,0.223001482,1.044899116,0.691577964,0.216742429,1.627417703,0.44836597,0.308353705,0.085927839,0.315823153,0.113019831,0.382720227,0.768330911,0.351838618,0.251483206,0.33961026,0.490738169,0.168985153,0.513083307,0.176202613,0.657992379,0.025628691,0.742388272,0.154930334,0.276379821,0.137410339,0.064335589,0.228531728,0.135941529,0.074940736,0.218189201,0.266474316,0.066494071,0.179098709,0.056255179,0.072126253,0.164720228,0.010433904,0.015418321,0.015034046,0.050270758,0.050955721,0.006385961,0.026569687,0.028420935,1.6920442,0.431040515,7.615467452,0.894541484,0.481916158,0.190007738,1.830212286,0.501102976,0.089091887,0.221129555,0.083012942,0.085899352,0.074913499,0.152340181,0.559798636,0.038469217,0.088058773,0.049061861,0.06497362,0.077885447,0.033548604,0.068584221,0.040143109,0.012570966,0.011889809,0.008271432,0.073359993,0.019521429,0.033234908,0.009053959
E07000229,2014,0.561106285,0.612740579,0.625563358,0.316143535,0.207406577,0.177820565,0.646763993,1.458239907,0.312324163,0.394485105,0.210748581,0.354515445,0.400771305,0.806475902,0.823523581,0.262488054,0.84078206,0.017881637,0.131896046,0.960574542,1.052288452,0.766510652,1.118750876,0.336530745,0.504398784,0.390085995,0.14529209,0.892499929,0.087284395,2.254863468,0.06538914,0.25434979,0.230582833,1.025126693,0.685097308,0.219844,1.499846944,0.443187852,0.308428349,0.09165791,0.313191997,0.114444502,0.379180084,0.761502494,0.335664503,0.249511588,0.329084348,0.470656961,0.168597276,0.499647324,0.172042602,0.662394665,0.026055929,0.706606573,0.16820965,0.28653495,0.134716968,0.064353798,0.190730574,0.130868606,0.077129003,0.221928169,0.312958664,0.06602843,0.182747432,0.062169806,0.071071922,0.160472506,0.01044173,0.013421043,0.016731999,0.05031949,0.049049476,0.006120915,0.026095899,0.030537432,1.606937974,0.381006783,7.202309837,0.779478391,0.42711239,0.181793329,1.803061788,0.42051923,0.091663025,0.19792522,0.077423901,0.06775376,0.072020875,0.15282107,0.535619479,0.034604791,0.079761025,0.044309599,0.058383425,0.069946638,0.029636069,0.063425811,0.03356618,0.012731587,0.010751068,0.007967441,0.087433743,0.018538734,0.030993137,0.010538535
E07000234,2014,0.587629129,0.629562875,0.635115986,0.31371029,0.206024469,0.179143268,0.65102248,1.410498541,0.318099946,0.396467888,0.216597791,0.374879682,0.409350908,0.799988057,0.845243978,0.270751645,0.870677849,0.019842533,0.128403139,0.975870462,1.062169862,0.779641131,1.129185897,0.342471389,0.521822795,0.408083901,0.151664477,0.93530783,0.081391644,2.313604728,0.064273028,0.257708188,0.227189133,1.04069505,0.699653563,0.211213826,1.676145935,0.463116811,0.308289234,0.076527603,0.324198707,0.112328858,0.375222395,0.802636623,0.35162307,0.246433526,0.337481408,0.475583164,0.16580051,0.509024939,0.169450652,0.674235812,0.024850933,0.756624586,0.150496242,0.280462901,0.138535797,0.064073131,0.2285038,0.138266129,0.074805828,0.226079786,0.285751861,0.067071957,0.164403997,0.05310051,0.070120993,0.168575062,0.011247005,0.013842142,0.013826939,0.050938216,0.050751203,0.006456447,0.027148921,0.031300301,1.691243109,0.393800193,7.482212365,0.888167488,0.450730422,0.181564233,1.75683026,0.457937514,0.088826011,0.205228698,0.077851409,0.080951989,0.071027542,0.14701593,0.531348305,0.034942008,0.079815295,0.04509006,0.059286496,0.071449223,0.032793903,0.066702275,0.040437578,0.011945572,0.010764791,0.007940048,0.066122337,0.019054632,0.031944225,0.008825948
E07000235,2014,0.578032045,0.618599354,0.631011175,0.31272972,0.203765299,0.187014087,0.643015948,1.477464682,0.315542287,0.402271234,0.223952262,0.377473175,0.400420577,0.790001836,0.846938642,0.266751524,0.865294916,0.017042594,0.127435632,0.987957705,1.044253502,0.802471444,1.151083069,0.358135607,0.533959222,0.401433573,0.150831689,0.950594921,0.081140587,2.343474686,0.062440046,0.252059057,0.237326719,1.035200355,0.693586876,0.217235216,1.611009068,0.474643242,0.308133134,0.06883455,0.330658764,0.119561912,0.384829386,0.849207076,0.33038763,0.249879893,0.34145262,0.454037415,0.165931184,0.513000001,0.161989101,0.684622999,0.024031131,0.742344362,0.151291469,0.29500816,0.142420048,0.062998741,0.183464253,0.141347884,0.082350917,0.23443594,0.309123683,0.072417202,0.165175147,0.058956935,0.071298435,0.168091642,0.011972739,0.011731251,0.013762057,0.051276606,0.053273622,0.006894845,0.028154458,0.036591144,1.62327164,0.359836431,7.171113324,0.812912088,0.391003662,0.164562555,1.660513637,0.343253175,0.087249575,0.165803927,0.068872715,0.065699543,0.067105558,0.152992316,0.480306154,0.032876938,0.075985697,0.043279631,0.056668976,0.068852042,0.027791507,0.057185196,0.033955175,0.011782377,0.01001636,0.007449332,0.086906789,0.016903272,0.031359664,0.009975704
E07000236,2014,0.495730724,0.572106993,0.577999521,0.278370809,0.175769729,0.159111811,0.590339847,1.369341262,0.293775964,0.355049671,0.188033392,0.321161126,0.368827947,0.790519835,0.768673452,0.238123001,0.772482821,0.015102281,0.124448301,0.879888481,0.968177716,0.68552212,1.028141637,0.302802979,0.454915917,0.363155825,0.132308503,0.818480661,0.087483559,2.020043548,0.062567102,0.235541359,0.199004754,0.974924951,0.643803815,0.199685651,1.346114683,0.389670578,0.286102247,0.095905113,0.294931058,0.103813981,0.346277941,0.736251574,0.319547562,0.22529239,0.305230292,0.442868784,0.156809046,0.451409103,0.1621614,0.595937115,0.025659445,0.681102552,0.156512171,0.276728595,0.115624254,0.06137057,0.177449909,0.116713108,0.061671346,0.191746912,0.297408953,0.05704023,0.183935135,0.058128023,0.061300499,0.162650421,0.009492133,0.012558446,0.016503299,0.042813094,0.044078685,0.00544931,0.024000068,0.028565206,1.458744287,0.375415138,6.448971356,0.706734458,0.411936128,0.185099188,1.72420605,0.467463234,0.08957992,0.178420603,0.075858711,0.058290757,0.072733128,0.134758746,0.51567714,0.036348108,0.08362257,0.046051004,0.061108366,0.072836823,0.028807057,0.061153019,0.030400246,0.011188981,0.011417779,0.007759435,0.067895357,0.018109628,0.027937819,0.008440885
E07000237,2014,0.515571925,0.585197298,0.588079696,0.287803965,0.180460324,0.156285123,0.590528774,1.396593804,0.294570932,0.361227461,0.191457519,0.33329587,0.373216197,0.792944044,0.795168041,0.241800173,0.791845326,0.017469218,0.124989486,0.900753195,0.991288049,0.700514849,1.045312425,0.30154716,0.463178347,0.37824004,0.129956555,0.84389196,0.079929448,2.101150941,0.064733293,0.238047998,0.202421742,0.964247381,0.662350614,0.196607363,1.443337751,0.407517538,0.28612937,0.083201091,0.293601265,0.10254962,0.334166504,0.730428614,0.338062011,0.22230955,0.302193852,0.449564563,0.153331517,0.460939677,0.166887392,0.606466664,0.02393489,0.697102637,0.145473107,0.250791322,0.117474942,0.057921331,0.202381138,0.122510153,0.065738294,0.195636261,0.295436134,0.057980397,0.170109957,0.051778014,0.061075212,0.165055965,0.009516566,0.012404487,0.014070866,0.044129589,0.045129906,0.005463483,0.02725277,0.026786284,1.627422401,0.439464478,7.015787399,0.799924776,0.46685142,0.204207049,1.800342245,0.529310392,0.089780824,0.214600849,0.085883281,0.066443069,0.078732386,0.155330542,0.558602403,0.034710861,0.07966072,0.044059891,0.058126762,0.070075478,0.030582991,0.069647682,0.036125011,0.01402186,0.010864077,0.007872247,0.08702244,0.018880087,0.028830871,0.008154031
E07000238,2014,0.587677848,0.630828957,0.631523065,0.321514632,0.205230776,0.184749209,0.642355047,1.527872848,0.31598823,0.402284466,0.218924257,0.384339332,0.408262111,0.795605299,0.842537801,0.27083032,0.878262308,0.017788515,0.123967862,0.981927628,1.057422703,0.791563522,1.136013825,0.35417434,0.527080035,0.410801589,0.154355186,0.945513701,0.078589677,2.336981876,0.064379517,0.254989227,0.233449481,1.022936385,0.693958007,0.215324149,1.642771595,0.472198074,0.306476117,0.072360072,0.323457946,0.115353443,0.375618948,0.818505859,0.342406388,0.248063889,0.333954237,0.458830603,0.16660867,0.512735613,0.166543079,0.673755556,0.024641183,0.758280922,0.151299198,0.270521056,0.142623147,0.065346059,0.203950404,0.139876826,0.080176992,0.230818023,0.298221119,0.06921553,0.157165173,0.055555848,0.070990293,0.173181109,0.011505174,0.012661275,0.012838968,0.051887319,0.04977254,0.006500555,0.027260635,0.037619052,1.683339555,0.378520214,7.464416522,0.860196643,0.435685179,0.17621121,1.787902405,0.373322858,0.091098854,0.188199664,0.073903197,0.076203553,0.069798358,0.163761303,0.526295189,0.033309814,0.077032387,0.043308447,0.056894737,0.068913974,0.027974434,0.060614361,0.036958634,0.013610001,0.010292434,0.008548367,0.077347497,0.019522043,0.033962605,0.011867362
E07000239,2014,0.545670447,0.601512977,0.613256754,0.306210302,0.189578457,0.175552034,0.614715129,1.504882513,0.309323416,0.383150299,0.214216781,0.361766833,0.382627624,0.797087417,0.831895292,0.256245509,0.832594663,0.016733563,0.12464928,0.951351393,1.022975336,0.771325748,1.116505638,0.34386538,0.501759439,0.395183387,0.140500939,0.911664738,0.080987314,2.26588685,0.064038174,0.245751412,0.23111741,1.006127193,0.688317852,0.208959714,1.508920925,0.454252294,0.302723831,0.072640841,0.322436005,0.115745716,0.367940756,0.799759013,0.330434456,0.23671092,0.322640494,0.441852338,0.160625124,0.485811566,0.163169342,0.654757038,0.023908274,0.729247607,0.154578513,0.279944926,0.13338368,0.060881788,0.175999899,0.133125507,0.0787745,0.222634927,0.336693551,0.066811755,0.16387638,0.056739576,0.067537626,0.164790596,0.011359409,0.011695193,0.013622423,0.049011222,0.048803383,0.006369853,0.026723304,0.030596957,1.582111421,0.359447082,6.801012588,0.753654448,0.385284064,0.172986466,1.652871953,0.380742533,0.085790677,0.166294484,0.070306901,0.055171535,0.069634587,0.145009166,0.482346952,0.032704239,0.076173477,0.042349803,0.055838859,0.066753628,0.027687623,0.057196107,0.032899347,0.012696359,0.010280001,0.00683526,0.096038442,0.017962795,0.029988797,0.00856081
E07000240,2014,0.569098025,0.616258402,0.617725624,0.298502737,0.212825324,0.166029253,0.660052414,1.25316147,0.300850578,0.382625891,0.193419009,0.339246263,0.412821297,0.775838943,0.796035825,0.255608457,0.825722438,0.020552945,0.133630775,0.911159962,1.054576991,0.715216821,1.047743023,0.301765319,0.480272657,0.375772125,0.144350678,0.84207383,0.09398515,2.086816798,0.066484755,0.254218273,0.203081211,1.017782668,0.661450305,0.208112548,1.560025014,0.406053958,0.295582629,0.08868176,0.293898097,0.105885484,0.372466938,0.706721658,0.33989701,0.245210797,0.342914177,0.497122147,0.164961937,0.485975282,0.177994089,0.620831808,0.024416054,0.679850297,0.157168353,0.274558544,0.127901781,0.063847593,0.227736943,0.128608696,0.067355038,0.203117784,0.247205045,0.06128674,0.18805079,0.056807866,0.068160543,0.150072073,0.008812243,0.014315809,0.018671585,0.046931151,0.045542145,0.00537129,0.023881496,0.023094125,1.592236279,0.42672649,7.644399498,0.898460627,0.485544453,0.184257462,1.829230062,0.55010331,0.08885642,0.254028265,0.08640742,0.106455024,0.072610307,0.140329301,0.577240215,0.040980135,0.094598275,0.052064309,0.068996563,0.082547486,0.030360839,0.069111057,0.038167401,0.011336191,0.012747809,0.00806492,0.063528171,0.019689931,0.031796729,0.008639996
E07000241,2014,0.504368373,0.569031253,0.577857271,0.278861513,0.191276737,0.157435129,0.613682033,1.143837731,0.285453047,0.353963088,0.184188833,0.302219913,0.379557863,0.754400656,0.733374999,0.23528118,0.750380835,0.016531464,0.132773611,0.85293566,0.969423286,0.65959172,0.992536537,0.279773284,0.447691895,0.340932871,0.134504512,0.790526616,0.092889803,1.908010502,0.058950023,0.23651183,0.193800982,0.964768527,0.609667257,0.201697469,1.31198828,0.375394744,0.283513197,0.090987216,0.279542734,0.101553036,0.364853805,0.70035055,0.303598792,0.236080927,0.318068637,0.475352875,0.158076343,0.454014768,0.170583704,0.578725853,0.027844359,0.626463036,0.14860299,0.292249375,0.119413286,0.059549003,0.182736441,0.122095765,0.060995422,0.186376578,0.257517951,0.060177841,0.206521668,0.065540132,0.064112068,0.139456626,0.008080669,0.013213462,0.018812245,0.041574349,0.047743652,0.005132659,0.022584182,0.023853658,1.473381179,0.457268846,6.911961346,0.763302262,0.463191503,0.189557737,1.739510649,0.524284701,0.092102094,0.206300977,0.080381296,0.079977161,0.076031538,0.146046144,0.54895773,0.035151237,0.080824309,0.04425489,0.058802369,0.070136937,0.031881745,0.064669988,0.031540094,0.010495906,0.01097658,0.008341342,0.057629513,0.017059453,0.028782526,0.007546046
E07000242,2014,0.562535686,0.623304062,0.621765507,0.304355622,0.203229831,0.17105966,0.645135307,1.404947942,0.310726385,0.389776057,0.204091931,0.354581726,0.407448489,0.811661423,0.82278611,0.261957872,0.846828653,0.019906692,0.131164257,0.947702572,1.065793284,0.746023598,1.09395783,0.323533434,0.495277664,0.396959456,0.145117001,0.897973988,0.08677346,2.209112148,0.06725834,0.254638346,0.215099259,1.027711419,0.690726812,0.210413634,1.56230221,0.437393746,0.29979926,0.083187551,0.312059285,0.109359882,0.364768931,0.735571704,0.352427492,0.241449574,0.330343218,0.486517753,0.163516319,0.494619478,0.179817758,0.639078877,0.024452449,0.7213149,0.158727166,0.270429449,0.130325372,0.062453806,0.217881961,0.127953722,0.069707564,0.211390053,0.285869253,0.061885732,0.178871897,0.057463832,0.066695993,0.166625776,0.009700243,0.014353075,0.015534287,0.048163876,0.047214229,0.005679338,0.026731741,0.027332677,1.657856521,0.41299521,7.396624072,0.859805494,0.474239936,0.190467001,1.851990373,0.489604746,0.09228684,0.22785506,0.084282002,0.085925485,0.075087236,0.152576379,0.57412264,0.039096376,0.090249669,0.050285618,0.066708535,0.080246064,0.029630144,0.069570993,0.037180024,0.012443674,0.012072128,0.00830579,0.074725316,0.019643038,0.031967736,0.009376118
E07000243,2014,0.508818618,0.576883274,0.580926255,0.293614636,0.18038593,0.157368984,0.586943293,1.37056313,0.293672805,0.362104981,0.189642257,0.321745868,0.369768581,0.790380661,0.764898873,0.23934874,0.778600349,0.016962542,0.129416691,0.885402792,0.992449983,0.691080405,1.033789665,0.295980535,0.457722547,0.370866775,0.127649975,0.823847936,0.082907676,2.059870595,0.064784334,0.237137691,0.200014854,0.968288876,0.657263593,0.19839913,1.370448946,0.399902824,0.282645705,0.094632349,0.290933477,0.104278708,0.335115379,0.698041002,0.331706864,0.225312353,0.300515204,0.456870289,0.153205021,0.455911013,0.174062102,0.590557431,0.024870138,0.672036233,0.151059961,0.264892645,0.114349244,0.057039468,0.189572233,0.115485573,0.065681537,0.192919024,0.304090055,0.057305597,0.182363152,0.058767708,0.061661043,0.159499649,0.009047562,0.011914714,0.014211432,0.043636203,0.046176015,0.005071645,0.026073941,0.023981021,1.553218417,0.413535904,6.724638914,0.74333022,0.452034364,0.196992027,1.805003165,0.48917672,0.089753684,0.202923894,0.080933851,0.067617335,0.077959157,0.151836062,0.542332469,0.037698168,0.085842656,0.047487806,0.06282948,0.074571556,0.02921445,0.065811075,0.034968554,0.011784378,0.011627675,0.007932911,0.087850075,0.018067182,0.028974434,0.00869695
E08000001,2014,0.480121719,0.551004395,0.569486645,0.276053598,0.178571322,0.157522778,0.586247661,1.366368573,0.290417079,0.34818173,0.186895425,0.30945564,0.358861277,0.785419873,0.753699194,0.237771704,0.747986084,0.015318049,0.126174665,0.86699494,0.962318747,0.688322594,1.019415514,0.29852193,0.444169522,0.349113766,0.128715119,0.786972379,0.088646615,1.987485915,0.062750068,0.234054339,0.202729179,0.955530216,0.64074575,0.202246143,1.259283296,0.382057734,0.285484779,0.098483952,0.290516897,0.102982095,0.342147154,0.695012824,0.310876814,0.22726152,0.297133521,0.42945307,0.156132813,0.440109939,0.162370083,0.591548467,0.026034267,0.637692484,0.168230528,0.289923628,0.11618203,0.059911616,0.157813652,0.109901017,0.063708393,0.192653959,0.318684851,0.056363616,0.186416216,0.062775721,0.061323588,0.148387673,0.008962975,0.01240437,0.018859655,0.042494567,0.043002143,0.005474522,0.023390658,0.025531374,1.410332048,0.334835997,6.194140392,0.643536456,0.381882514,0.177063284,1.684121483,0.41116139,0.086908143,0.168256239,0.072288994,0.05090953,0.069570373,0.130475625,0.491262833,0.038911575,0.089540204,0.049423886,0.065109645,0.07817437,0.02657403,0.058934307,0.029209156,0.010325858,0.012156803,0.007020908,0.084097473,0.017550155,0.027184171,0.007862853
E08000002,2014,0.520806446,0.581730407,0.592885188,0.294902771,0.186912512,0.164140068,0.605584668,1.413878919,0.298790718,0.365547622,0.195217445,0.333070967,0.377723235,0.793933878,0.782026545,0.24740281,0.793239784,0.017437613,0.127110714,0.902770914,1.002994149,0.714036634,1.055606767,0.313189546,0.467498856,0.371093696,0.135347401,0.841679142,0.085273481,2.108370258,0.064249879,0.242293845,0.212174788,0.981125014,0.663469418,0.204799617,1.387826601,0.414235694,0.292327938,0.093699381,0.29755684,0.105668326,0.351004581,0.709063558,0.329582789,0.231460767,0.307151119,0.450082404,0.160116212,0.462043242,0.168772356,0.613108534,0.025435339,0.670412844,0.16105942,0.278054692,0.121841564,0.061391187,0.184622233,0.119322904,0.067636152,0.203067536,0.314346886,0.058671652,0.177082835,0.059650893,0.063414472,0.156075736,0.009467841,0.01255438,0.016504927,0.045597598,0.04445492,0.005727412,0.02492772,0.025031235,1.526565692,0.365737948,6.682787018,0.73362036,0.41630613,0.180399194,1.76402983,0.426723786,0.087632633,0.190447294,0.075968012,0.061190275,0.071431826,0.143557513,0.520664487,0.038053914,0.087938831,0.048253387,0.063884969,0.076685776,0.02732297,0.063000326,0.034906075,0.011650972,0.011847701,0.007496177,0.089091128,0.018303763,0.02870896,0.008965906
E08000003,2014,0.391984107,0.478199672,0.4957546,0.249297633,0.155372573,0.126286918,0.520407053,1.207502753,0.261364046,0.293148793,0.155337789,0.233802174,0.318836825,0.750157355,0.618938663,0.204814161,0.621671228,0.012890062,0.133244467,0.725938046,0.8683519,0.554660348,0.870853422,0.235124802,0.367093683,0.281361445,0.103066933,0.671306128,0.085513732,1.576475441,0.05889654,0.207450844,0.166163209,0.848973578,0.550502548,0.188293882,0.948956539,0.295523802,0.262456996,0.11256959,0.237845406,0.092101386,0.310265418,0.583847074,0.265264588,0.205901959,0.262686253,0.421407635,0.137394528,0.371659892,0.159906921,0.487588259,0.028594007,0.524457416,0.164621405,0.265051099,0.100602471,0.052295608,0.124582207,0.086560898,0.051713096,0.151661646,0.326667961,0.046437145,0.197895478,0.069753376,0.050090616,0.126190458,0.005812851,0.012654142,0.01907325,0.034919468,0.042837764,0.003984029,0.018740961,0.015780352,1.39836727,0.409049734,5.782722519,0.572476813,0.421182656,0.211965708,1.747775627,0.491608089,0.087852815,0.19069377,0.082947765,0.065017527,0.076195157,0.140203693,0.552890436,0.036362906,0.083376983,0.04530335,0.059871845,0.071149841,0.032076531,0.061756651,0.021534109,0.008724995,0.011518647,0.007317591,0.062052281,0.016644404,0.022182499,0.007764045
E08000004,2014,0.44887092,0.51741355,0.554993596,0.259255978,0.178751412,0.152458226,0.585367972,1.238961248,0.285077827,0.328680838,0.176313823,0.27776221,0.347657384,0.768440755,0.707225251,0.230308955,0.695172506,0.014436549,0.12951945,0.822582298,0.929622732,0.657946254,0.967646846,0.2769169,0.4196213,0.312631053,0.121525629,0.7111807,0.097535393,1.816949465,0.059893631,0.230874627,0.195618118,0.939913671,0.605677212,0.206202117,1.118319111,0.34324952,0.281454432,0.113400859,0.274632487,0.099586531,0.339274912,0.642564944,0.28426032,0.232181748,0.294845911,0.413691534,0.159696992,0.417466134,0.157273011,0.566255659,0.028181167,0.583986588,0.181569833,0.317670145,0.111117554,0.060521997,0.138801603,0.101230075,0.058450315,0.180943978,0.310439423,0.054216127,0.20009338,0.069955371,0.060795308,0.128206867,0.007899435,0.011627453,0.024360715,0.040215667,0.041287135,0.005435201,0.020465132,0.019574807,1.245675505,0.293184774,5.714196299,0.556185777,0.343033246,0.160296464,1.616689667,0.391516121,0.085529687,0.14925211,0.06625515,0.042421441,0.066174945,0.112066614,0.464763125,0.042515414,0.097612363,0.054267012,0.071388085,0.085823902,0.024941858,0.05481304,0.02500842,0.007776337,0.013240521,0.006429152,0.078676295,0.01643683,0.025371859,0.006068003
E08000005,2014,0.472028851,0.540955733,0.563771616,0.27604106,0.177800435,0.155785363,0.583214356,1.343454767,0.28725695,0.344734049,0.185566364,0.302260523,0.355590479,0.782297531,0.736129138,0.236369216,0.735292584,0.015444488,0.128706744,0.850549211,0.956177468,0.680260986,1.005554265,0.293603724,0.435681069,0.339073734,0.126008257,0.774925941,0.087856468,1.951169962,0.063467547,0.233115663,0.202001872,0.94511129,0.632103521,0.202502924,1.207518484,0.374590978,0.283326414,0.100965728,0.287955087,0.102432931,0.342307743,0.667348647,0.306000911,0.226958268,0.294802163,0.42897887,0.154927969,0.431958898,0.165023952,0.581300638,0.02672947,0.613990328,0.171836903,0.295738864,0.114946526,0.058720989,0.149557889,0.107251396,0.062009075,0.189866165,0.327388393,0.055029478,0.186444418,0.065090955,0.060868331,0.144212907,0.008327096,0.01233451,0.0191761,0.041498047,0.043250676,0.005325242,0.022386115,0.022998752,1.383591841,0.331339404,6.034207031,0.624302457,0.369879514,0.174530177,1.68008917,0.400332813,0.086490846,0.164820579,0.070691269,0.04962545,0.068623887,0.127236082,0.486781554,0.039304344,0.090496274,0.049884472,0.065820335,0.078855901,0.025636895,0.057830284,0.028655654,0.009505551,0.012287125,0.006907404,0.089066591,0.016895709,0.026468142,0.007412153
E08000006,2014,0.470616353,0.548703853,0.554525011,0.282823241,0.169821898,0.147282816,0.552661207,1.392654922,0.281629192,0.337535878,0.180969248,0.303488097,0.34670688,0.777058527,0.72867262,0.231469741,0.733812495,0.015491179,0.125474947,0.843630518,0.93928457,0.657847015,0.998635938,0.286621329,0.430032252,0.352039668,0.119214995,0.786383315,0.079541873,1.97219774,0.063129502,0.225241583,0.195017831,0.919055697,0.631508435,0.192055408,1.26325058,0.382681916,0.277469129,0.09610893,0.277688201,0.10101874,0.322453957,0.686470513,0.312869343,0.214698042,0.282479303,0.429951596,0.146709763,0.429348535,0.165660452,0.570576871,0.024726002,0.647821857,0.153388617,0.257363576,0.110530985,0.056006511,0.16653976,0.107781405,0.064676254,0.184139411,0.332039411,0.053355468,0.178436703,0.057833933,0.057695423,0.154863329,0.008720384,0.011149401,0.014363696,0.041406788,0.04327569,0.004883584,0.024343209,0.023725702,1.52665857,0.40255146,6.407152442,0.674962868,0.424117918,0.198772684,1.769987824,0.475508849,0.087437926,0.195279887,0.07972033,0.057255672,0.073961121,0.150775991,0.540158413,0.035575066,0.081976005,0.044576818,0.058974354,0.070206719,0.027395824,0.063535402,0.028665913,0.011378015,0.011268248,0.007123703,0.094126783,0.017676295,0.026364469,0.009179341
E08000007,2014,0.537106344,0.594080916,0.603840054,0.297327617,0.193261364,0.167494224,0.61838567,1.406277047,0.302925328,0.374364565,0.201074447,0.34321199,0.387309111,0.788944489,0.80176967,0.252310975,0.812379268,0.017734084,0.126494456,0.925172826,1.018571833,0.733637318,1.072512272,0.319056775,0.483714566,0.378933875,0.139747758,0.859675212,0.08467766,2.156822406,0.063790694,0.24630847,0.215893804,0.991286863,0.668262136,0.208255136,1.463427844,0.425438552,0.296462788,0.084893747,0.303228616,0.107508439,0.35887095,0.738011019,0.33239685,0.236758977,0.31769872,0.454870068,0.161404095,0.476476066,0.16789443,0.631739841,0.025289302,0.692556855,0.158271093,0.277716186,0.126639621,0.061666278,0.193418011,0.125504445,0.07122976,0.208598312,0.301265249,0.061840409,0.174857528,0.058007074,0.066419364,0.160149259,0.010123437,0.013013818,0.016349348,0.046889584,0.046830482,0.005870339,0.025890641,0.027887,1.573525047,0.382158178,6.959934405,0.776246677,0.426485211,0.180833278,1.756208414,0.440649731,0.087683294,0.19425062,0.07679233,0.063923405,0.072377099,0.146000439,0.524356033,0.035861611,0.08269512,0.045710303,0.060500184,0.07251161,0.028157479,0.064116196,0.034915097,0.012208607,0.01123454,0.007605979,0.089994073,0.018443265,0.030151253,0.009370848
E08000008,2014,0.498969337,0.570987606,0.577141555,0.295960632,0.174208028,0.159859874,0.574481539,1.503945551,0.296750583,0.362383035,0.19582164,0.332430291,0.358497569,0.804997602,0.780050362,0.24476619,0.783866101,0.015994977,0.125358276,0.89953142,0.98525511,0.710715443,1.062833164,0.317210609,0.460066734,0.377286521,0.127599203,0.853453024,0.078070707,2.137904008,0.066214658,0.234210721,0.210815336,0.963475628,0.671001626,0.19795708,1.336877111,0.417702644,0.287139338,0.090588198,0.30369036,0.10683953,0.334030021,0.716682141,0.328969276,0.218990125,0.292568654,0.438304752,0.151746464,0.450617516,0.169200172,0.606826604,0.024555825,0.680296912,0.160056885,0.264821939,0.117623926,0.057444658,0.16599871,0.113758813,0.068501984,0.200843938,0.349123763,0.056491261,0.169208677,0.057658599,0.059976272,0.163485178,0.009512968,0.011634754,0.013564192,0.044548989,0.0434971,0.005377482,0.025075761,0.026805176,1.518350415,0.356050496,6.374170292,0.676919168,0.39478153,0.188130037,1.749457957,0.407980513,0.088699512,0.176646617,0.074650161,0.052311545,0.070582449,0.1442044,0.506650663,0.036711592,0.084318182,0.046503227,0.061319576,0.073353266,0.025742016,0.060490732,0.030325459,0.011549212,0.011478334,0.007167501,0.100109568,0.018049382,0.027846129,0.009340086
E08000009,2014,0.521547395,0.583384903,0.592659207,0.286692629,0.19487116,0.162324941,0.618433844,1.28611213,0.297213033,0.366253323,0.1915943,0.323133762,0.386084919,0.77569241,0.770310555,0.246786527,0.784542059,0.018195442,0.130822974,0.895637461,1.006654963,0.701232864,1.035752568,0.301488077,0.465860214,0.364174634,0.137255473,0.82218957,0.089691426,2.051202546,0.063313818,0.243970817,0.203744941,0.982316597,0.649655351,0.206451895,1.393848182,0.399279409,0.289906602,0.093678579,0.29197704,0.104770822,0.360046435,0.694411763,0.324921882,0.236413515,0.318950887,0.464885269,0.160540218,0.465276616,0.170188863,0.607817847,0.025816245,0.663997522,0.159106091,0.281710495,0.121189505,0.061519293,0.189830828,0.121069565,0.066042639,0.197823748,0.279127221,0.059411237,0.190355304,0.060199206,0.065357132,0.151686585,0.008922336,0.01352602,0.018802783,0.044519583,0.045707964,0.005556338,0.023865735,0.024268244,1.499814129,0.386229877,6.82705509,0.754209378,0.433905756,0.180441188,1.75648611,0.473181962,0.087722414,0.205141094,0.078780357,0.069981799,0.071273277,0.138644114,0.540872156,0.03894684,0.08979662,0.049774462,0.065908808,0.079038663,0.028697929,0.064514676,0.033144203,0.009911608,0.012180916,0.007727739,0.078170486,0.01796959,0.029805996,0.008576712
E08000010,2014,0.533560273,0.598311059,0.599872087,0.304210633,0.180489318,0.165910706,0.593440669,1.538972657,0.304556345,0.376706635,0.203688622,0.352797727,0.373909019,0.814583631,0.8184472,0.253417903,0.824589007,0.017853208,0.12464175,0.928973944,1.019662395,0.738775023,1.095028613,0.33001909,0.481148259,0.398246402,0.135419108,0.894542332,0.076812818,2.236327186,0.067497878,0.241999605,0.21755273,0.992954426,0.693009832,0.198302667,1.488226463,0.441529825,0.294110906,0.080696494,0.31348249,0.108626216,0.340487804,0.755469087,0.347367784,0.222996805,0.304163816,0.449799982,0.15578784,0.471213282,0.170889761,0.630040065,0.023712937,0.736409067,0.151096928,0.250899051,0.124579249,0.059146125,0.197178438,0.123398038,0.070348333,0.209626674,0.338773493,0.059281105,0.160791623,0.052857859,0.061633023,0.171569302,0.010278721,0.011940826,0.011894792,0.047005457,0.045094194,0.00575207,0.027746934,0.027962371,1.63012583,0.386518565,6.848434343,0.770161625,0.427315517,0.192505231,1.786163258,0.434663891,0.089671182,0.19384302,0.077853093,0.061662361,0.07303448,0.151547566,0.529617337,0.035807334,0.082620341,0.045667872,0.060285437,0.072426429,0.028017341,0.064824255,0.034167414,0.012765369,0.011161606,0.007574141,0.091417381,0.018794033,0.029515316,0.009004973
E08000011,2014,0.51270447,0.581608946,0.586560015,0.303839732,0.174640879,0.161761102,0.58038104,1.536194727,0.298422112,0.372913764,0.203250598,0.342076384,0.36163256,0.817465287,0.801091757,0.249915492,0.806878994,0.017475998,0.123072267,0.916409754,1.005568599,0.737411887,1.08575916,0.326100258,0.471659749,0.393819728,0.125435973,0.870776488,0.075473502,2.22720936,0.069331715,0.236782366,0.214177528,0.971205063,0.694669751,0.195910875,1.382522823,0.44035254,0.288979979,0.079028989,0.309973419,0.109375557,0.325230686,0.701640567,0.342754658,0.217133096,0.293873263,0.442576447,0.14944913,0.459282958,0.17461792,0.621473505,0.024516085,0.688660162,0.160412862,0.250402662,0.120832497,0.055478655,0.169003769,0.116101322,0.070301929,0.207945795,0.35994601,0.058868223,0.160777417,0.054397157,0.06017534,0.167701961,0.009948321,0.012884706,0.011492184,0.045666495,0.04305167,0.00485453,0.026209451,0.027115468,1.496588187,0.368200636,6.443007622,0.68745152,0.394553228,0.188146166,1.717717062,0.384739266,0.088857168,0.175406885,0.07353253,0.05857256,0.071733759,0.140392799,0.49094523,0.036660053,0.084792393,0.046628102,0.061535672,0.074033928,0.026595061,0.062176923,0.031464564,0.012757784,0.011503493,0.006821061,0.105483629,0.018299067,0.027783562,0.008568249
E08000012,2014,0.468026176,0.549933314,0.561786037,0.284239257,0.171906984,0.150031218,0.56370949,1.49046722,0.281807543,0.340819304,0.186602903,0.309431175,0.351385844,0.797970263,0.734988419,0.236977294,0.741422014,0.016628141,0.127379636,0.844787231,0.957054333,0.677750517,1.016814624,0.295770237,0.432257757,0.350308085,0.118567596,0.797234646,0.078320088,2.014298526,0.066520339,0.227530773,0.202832106,0.929637117,0.643212356,0.195060513,1.235638394,0.394888304,0.28503281,0.083721546,0.285848091,0.103825101,0.324070725,0.680127904,0.316707934,0.215593982,0.284766579,0.429520531,0.146580429,0.424844017,0.170377375,0.579935964,0.026254786,0.64001438,0.160031982,0.257135504,0.114111358,0.054966401,0.15502279,0.107956997,0.067791181,0.190186927,0.378245332,0.054130469,0.171330832,0.061725089,0.056747103,0.152673903,0.008621771,0.012389755,0.014599173,0.042186001,0.042980192,0.004763714,0.02359262,0.021476813,1.573661871,0.410398071,6.445955477,0.683865128,0.417499718,0.204362146,1.785822422,0.437457963,0.090085781,0.197071609,0.079721616,0.060213249,0.073124045,0.152942862,0.53690188,0.032099709,0.073915175,0.040677271,0.053693999,0.064273282,0.027239603,0.065116149,0.029494722,0.011323157,0.010081259,0.006941746,0.090173998,0.018446141,0.024880464,0.008655033
E08000013,2014,0.533000605,0.594836541,0.600557788,0.305177176,0.181865961,0.168042681,0.596523521,1.566804164,0.30411993,0.380247529,0.208808835,0.358840861,0.373598989,0.813804726,0.823958785,0.255255953,0.827792003,0.017973973,0.123161913,0.933040916,1.02090299,0.7546707,1.103426619,0.337333109,0.487610826,0.39906477,0.135617844,0.906194158,0.076348603,2.266862802,0.068812201,0.241576393,0.223471162,0.993097999,0.695560199,0.199697622,1.471598087,0.450686641,0.298886459,0.07483264,0.320674604,0.111111227,0.346473965,0.75857643,0.342548612,0.224510044,0.307663914,0.444111996,0.155295941,0.471690055,0.169666396,0.639637065,0.024165411,0.724074745,0.154972172,0.258666621,0.128090756,0.058958897,0.180831764,0.125432216,0.073897332,0.215958739,0.35760669,0.06181299,0.158100537,0.053672685,0.062906794,0.170294144,0.010553109,0.012894504,0.011737334,0.047974773,0.045861574,0.00563985,0.027195859,0.029659769,1.598281881,0.37006807,6.745749735,0.755608496,0.399769625,0.184970906,1.722959467,0.395343993,0.087729444,0.180547387,0.073619752,0.060230751,0.070165537,0.142995583,0.500618098,0.034615413,0.079894982,0.04432058,0.058418849,0.069973722,0.027421862,0.061627388,0.032962944,0.012271475,0.01083851,0.007193101,0.098297261,0.018753217,0.02874,0.008780152
E08000014,2014,0.555617783,0.599494575,0.613978581,0.31151709,0.192756487,0.174337669,0.618232409,1.493301871,0.306647073,0.388284617,0.214221761,0.366931815,0.386030482,0.801013081,0.827165292,0.258846339,0.839385991,0.018034622,0.124551499,0.953281623,1.028289732,0.769290046,1.115964255,0.341472079,0.504566828,0.400994056,0.139870863,0.908792742,0.078542078,2.304275398,0.066573302,0.245947154,0.230035463,1.005178646,0.691083743,0.207217201,1.523896967,0.460021585,0.303032446,0.076987746,0.322948514,0.113496771,0.363687514,0.764872444,0.338840176,0.235338761,0.316791711,0.448675953,0.16044475,0.490364835,0.16698843,0.660078083,0.024122073,0.713325801,0.157324163,0.269696763,0.132704485,0.060363355,0.186859483,0.131344958,0.07755527,0.223151571,0.329197061,0.066233532,0.163448077,0.054773944,0.067308503,0.167511403,0.011211441,0.01463879,0.012405691,0.050033709,0.048320757,0.005873644,0.026671722,0.029612334,1.58699559,0.37863736,6.961027879,0.766876184,0.404586156,0.177844471,1.691200093,0.394223739,0.085897572,0.179625833,0.072399971,0.068703498,0.06925016,0.146383776,0.49325744,0.033674755,0.077984843,0.043435218,0.05726138,0.068949807,0.02911614,0.061811662,0.035126233,0.012856947,0.010460696,0.007080537,0.104113727,0.018432985,0.029403095,0.00930074
E08000015,2014,0.545890989,0.594466121,0.606608595,0.307090525,0.188045102,0.169647209,0.605342147,1.496249631,0.303929022,0.381895586,0.208231402,0.36173922,0.378852285,0.799791567,0.820259288,0.254428576,0.827037194,0.018330553,0.124031642,0.939996442,1.02070142,0.755121181,1.102739436,0.336438906,0.492003259,0.396304533,0.137045614,0.905288153,0.077322206,2.269148812,0.06691402,0.243101689,0.227006064,0.992286008,0.686060373,0.203002193,1.492270593,0.452852727,0.299201014,0.075246985,0.317156017,0.1105872,0.355697715,0.741136431,0.339919503,0.229088546,0.309717407,0.446139851,0.157743851,0.479796565,0.167939879,0.645751705,0.023824823,0.701437778,0.154815542,0.265086677,0.129913016,0.059963833,0.187995167,0.128483487,0.074594814,0.217886808,0.32898227,0.063328912,0.160708717,0.054179983,0.064737918,0.16559526,0.010605975,0.012823229,0.012428415,0.048492146,0.047128468,0.005991943,0.026731829,0.027884259,1.581253225,0.376747487,6.864558437,0.764541549,0.408612355,0.179579228,1.71269877,0.405022992,0.085650184,0.184318028,0.073615346,0.061769158,0.06982981,0.146030823,0.501457484,0.035894118,0.083118618,0.046035626,0.060787869,0.073150713,0.027829198,0.063434907,0.035423688,0.013972185,0.011157623,0.007039138,0.10723284,0.018239555,0.029232421,0.008841641
E08000016,2014,0.524206771,0.588884731,0.592373711,0.305362072,0.17820929,0.165538141,0.585752126,1.545431484,0.30081271,0.375404975,0.205723746,0.349794135,0.366356485,0.813586247,0.810203826,0.251961674,0.818426209,0.017333191,0.121980443,0.925996495,1.008210269,0.744176261,1.096698327,0.331085962,0.481368053,0.395297307,0.131036766,0.888173767,0.074028477,2.248761573,0.067259851,0.237677544,0.219158294,0.978973836,0.694041354,0.196693648,1.46408007,0.444359006,0.293440794,0.079993664,0.313560649,0.109068628,0.334037783,0.750653888,0.344557228,0.219134723,0.300991617,0.440224296,0.152500777,0.467407899,0.169502782,0.630775733,0.023551311,0.723210713,0.154292967,0.253080235,0.12469234,0.057639087,0.185782895,0.120479365,0.071004667,0.211675838,0.358672845,0.059850836,0.156572223,0.052913741,0.06164537,0.173320722,0.010341591,0.012275321,0.011525015,0.047049269,0.044409196,0.00538968,0.02699158,0.029294092,1.605524113,0.366725273,6.702541796,0.744584349,0.402741607,0.18641341,1.742159902,0.403810166,0.089012715,0.179274622,0.073490362,0.05973081,0.070436047,0.148258935,0.499083011,0.03415996,0.078766055,0.043396171,0.057304905,0.068657866,0.02779228,0.062762499,0.032712308,0.012962532,0.010724489,0.007027166,0.095284373,0.018509326,0.028170767,0.008985733
E08000017,2014,0.508244267,0.571233748,0.579230719,0.297612267,0.174868751,0.161402321,0.576103476,1.483301026,0.294654839,0.365682328,0.199925911,0.335874481,0.358441727,0.794330256,0.788420319,0.245135084,0.793133274,0.016681015,0.120997924,0.899655731,0.983118473,0.722389122,1.063265546,0.320447163,0.46915684,0.380783182,0.128031799,0.858427497,0.07625748,2.16706358,0.065897215,0.233877724,0.211277216,0.959676982,0.67053597,0.194834073,1.404442794,0.424186903,0.286862927,0.082010091,0.304878075,0.106860823,0.331138759,0.730764427,0.332278844,0.218178253,0.296598229,0.431533611,0.151062442,0.455772856,0.165801688,0.615058148,0.023727709,0.698335735,0.153811506,0.258916845,0.121815652,0.056623248,0.17614347,0.118599025,0.069779692,0.204987902,0.34226554,0.058637327,0.158526115,0.053707835,0.061117621,0.166442415,0.009999319,0.012029613,0.012557178,0.045219729,0.044313106,0.005328737,0.025781152,0.028474421,1.528855931,0.362401083,6.487438951,0.710018717,0.391305537,0.183130839,1.693414196,0.399950854,0.086652562,0.173530702,0.072610865,0.056994462,0.069803623,0.139820643,0.49229519,0.035548704,0.081966623,0.045201627,0.059832983,0.071520349,0.026901094,0.06160255,0.030717576,0.012247557,0.011087887,0.006982248,0.092821139,0.017923529,0.027589737,0.00828006
E08000018,2014,0.510027311,0.57205638,0.583407336,0.297478045,0.178773825,0.164021733,0.585508643,1.507512275,0.295937447,0.3674816,0.202246991,0.338227909,0.362678729,0.802201277,0.793071227,0.249547,0.796515178,0.016790065,0.122309846,0.908527262,0.993594561,0.733895416,1.074963403,0.325669285,0.470252921,0.383266427,0.13099724,0.864623323,0.078256615,2.183034216,0.066930666,0.237490119,0.215104365,0.967304031,0.676102762,0.199192166,1.381510979,0.428432022,0.290765796,0.08263408,0.313002457,0.108074658,0.337749693,0.726338942,0.333098479,0.222836616,0.2992292,0.434377307,0.153517825,0.456755163,0.166732379,0.621190515,0.024839028,0.68827446,0.159644461,0.267031521,0.12270931,0.057258209,0.167641352,0.118357087,0.071739209,0.208130279,0.351145416,0.058988336,0.161027032,0.056901757,0.061900182,0.164744715,0.00984673,0.012424747,0.013668268,0.046067662,0.043850708,0.005493751,0.025783698,0.029320437,1.522948874,0.343891284,6.426847142,0.694663972,0.377520219,0.179215761,1.697168946,0.38111401,0.086494635,0.169674161,0.070925194,0.055064673,0.068247862,0.138757247,0.485928082,0.036473151,0.084321781,0.046681214,0.061635922,0.074112842,0.02538503,0.059961185,0.031958002,0.011170736,0.011370735,0.006908912,0.10000395,0.018136176,0.02736055,0.008457588
E08000019,2014,0.46875896,0.536745216,0.55084398,0.271295365,0.173507023,0.149143661,0.56488477,1.315279561,0.279675252,0.335285765,0.180677518,0.294421794,0.348358534,0.763223894,0.719389979,0.228825403,0.722862844,0.014930212,0.12631783,0.832253521,0.930769972,0.651888392,0.981172114,0.282346173,0.42960968,0.337440627,0.121292398,0.769839372,0.08406496,1.911431516,0.061268115,0.223819357,0.193926171,0.921598967,0.616372835,0.192505061,1.245296645,0.370794163,0.277140588,0.092833383,0.276797237,0.100607073,0.334625558,0.692837969,0.301320049,0.218573151,0.290734547,0.427222871,0.148839762,0.426822043,0.160300852,0.570175116,0.026178005,0.624227191,0.153793321,0.272823294,0.112738427,0.055980233,0.161880492,0.108619993,0.063540388,0.182489917,0.313860472,0.055309247,0.183597384,0.061363457,0.058751241,0.147401334,0.008562771,0.012587839,0.016799457,0.041201722,0.043654976,0.00500316,0.02308265,0.022874638,1.49132029,0.402360889,6.415291235,0.67819356,0.424793896,0.199058186,1.713274996,0.462188226,0.088421785,0.187386042,0.078824382,0.063861855,0.073946579,0.149215544,0.528805382,0.034242702,0.078925822,0.04345957,0.057451679,0.068820871,0.030928113,0.062977064,0.029925418,0.010789008,0.010714552,0.007320812,0.077242912,0.018384324,0.025284998,0.007920449
E08000021,2014,0.457828334,0.53397324,0.54545345,0.268261804,0.167152197,0.146171346,0.551540359,1.3786372,0.276149232,0.330171473,0.177250673,0.299558439,0.342960413,0.765102433,0.723058631,0.226249264,0.720894222,0.015250108,0.121401438,0.82058223,0.918261517,0.647515698,0.978878609,0.280000655,0.417469463,0.337928458,0.117092043,0.760240212,0.078707505,1.917087745,0.062057924,0.220721055,0.192059206,0.907865973,0.612166276,0.188106162,1.206754445,0.371348804,0.273299235,0.081497888,0.274992415,0.097121359,0.316535076,0.672256052,0.305051487,0.210643855,0.280181768,0.420421579,0.14378543,0.414813282,0.160113411,0.558010123,0.025036124,0.630274012,0.150910946,0.246904724,0.108744761,0.053847607,0.159733067,0.106127314,0.062473085,0.180891931,0.333674695,0.053131437,0.171659235,0.057120311,0.055452425,0.149735843,0.008071738,0.011617044,0.015172437,0.040561158,0.039994969,0.004881064,0.023247239,0.021382609,1.55751332,0.447436506,6.523844509,0.676847427,0.438410006,0.211179126,1.752093978,0.47042342,0.092974784,0.200368463,0.083128349,0.058590983,0.076958978,0.159645261,0.549038362,0.032890429,0.075745509,0.041446838,0.055012164,0.065728167,0.029436819,0.066879994,0.030189454,0.011688424,0.010296479,0.007698214,0.087874535,0.018710399,0.025497337,0.008256258
E08000022,2014,0.537398058,0.605803986,0.611996995,0.306085147,0.186202591,0.169135658,0.606055236,1.508890847,0.30675157,0.382260992,0.207783903,0.355303006,0.381050704,0.812851473,0.826735924,0.254881997,0.832690504,0.017544377,0.126788775,0.945104497,1.027877838,0.755577685,1.113711685,0.333581148,0.4929793,0.397295202,0.13441798,0.897032246,0.079001865,2.267248981,0.067203463,0.24475708,0.221504145,1.005804506,0.697071389,0.205352743,1.478744798,0.445454894,0.300663574,0.077993955,0.315761674,0.110742724,0.348470142,0.757529131,0.344701621,0.229861989,0.312266863,0.451456185,0.158722206,0.481898085,0.171932637,0.643185861,0.023675705,0.727739383,0.156539455,0.264998134,0.127152769,0.059968503,0.189062258,0.125487374,0.072630614,0.214585842,0.337822607,0.062319688,0.166923131,0.054893237,0.064484197,0.172059758,0.010641167,0.012006561,0.013224752,0.047160359,0.046795713,0.005709197,0.027331716,0.029245692,1.581517011,0.390991686,6.850804025,0.751629028,0.417682135,0.18599719,1.754902494,0.43059155,0.089095472,0.187068508,0.076045058,0.056687472,0.071878174,0.148266003,0.514962541,0.033351269,0.077457591,0.042370995,0.056087107,0.067252749,0.027562247,0.064462401,0.031717913,0.013907601,0.010382042,0.00728032,0.107948529,0.018158345,0.029267764,0.009328604
E08000023,2014,0.534517983,0.592118638,0.608692423,0.30377423,0.18575146,0.16798906,0.603099475,1.545847975,0.30219049,0.379305504,0.208514187,0.358337599,0.377544987,0.816032028,0.817708277,0.254114391,0.822857901,0.017908608,0.124886002,0.939095739,1.020592787,0.757274082,1.10301377,0.333576124,0.490243445,0.394902028,0.133709343,0.895646792,0.077897388,2.274380693,0.068632278,0.243974688,0.226748391,0.990635513,0.693128991,0.203112564,1.457267231,0.448689272,0.299481919,0.073575298,0.316302195,0.110581054,0.349706146,0.749162062,0.341220902,0.228340071,0.308385201,0.443725302,0.157455726,0.477189753,0.169201064,0.643337164,0.024431713,0.698097006,0.157920937,0.268220669,0.127443598,0.059020953,0.183477416,0.126156337,0.07359938,0.216685656,0.352648735,0.062695942,0.163321393,0.055909558,0.064421187,0.167092558,0.010476741,0.01344482,0.013201733,0.048160743,0.04657712,0.005641128,0.027637181,0.02837843,1.599848816,0.375930366,6.809432889,0.749712664,0.411623125,0.186834872,1.738150582,0.407387997,0.087658214,0.182422307,0.074011567,0.060329503,0.072736585,0.149368929,0.498065349,0.033287414,0.077258337,0.042597305,0.056542394,0.067658606,0.027773423,0.064871806,0.034466965,0.013565401,0.010503943,0.00688753,0.120744074,0.018356609,0.028245049,0.00869801
E08000024,2014,0.521055592,0.589243558,0.600813418,0.304030696,0.179420952,0.166034944,0.592795199,1.583016251,0.303501042,0.374301281,0.206619923,0.353618943,0.368344339,0.827265618,0.815654203,0.254267503,0.816834309,0.017251086,0.125254167,0.932223447,1.014245094,0.754674735,1.109635924,0.33558154,0.478687829,0.394182397,0.130752328,0.893096487,0.078460921,2.253659906,0.068202084,0.240626929,0.225225138,0.991844083,0.698411753,0.201489375,1.400477807,0.446481734,0.299214918,0.076969992,0.321579219,0.111192782,0.340509373,0.750384917,0.340861241,0.224777676,0.301760459,0.440486011,0.155593466,0.467150825,0.171199597,0.639539024,0.024835863,0.703391438,0.161387351,0.270901262,0.125447354,0.059012314,0.169545949,0.120033131,0.074363832,0.215036488,0.376155263,0.06040293,0.164114966,0.057624421,0.062265025,0.167379203,0.010390619,0.011889409,0.012938584,0.047565304,0.044649945,0.005609882,0.026331718,0.026958829,1.563152506,0.363775932,6.539550985,0.701866472,0.387732118,0.187232013,1.724389261,0.395574063,0.088133758,0.174349879,0.072727882,0.053522493,0.070769099,0.143566271,0.492159651,0.033409846,0.076953852,0.042709188,0.056235776,0.06759447,0.026821322,0.061284848,0.032180979,0.0117039,0.01038843,0.00654271,0.117765191,0.018614292,0.026937867,0.008087863
E08000025,2014,0.410733371,0.484609897,0.518470992,0.246135294,0.170322955,0.13641916,0.557295273,1.084123013,0.26619504,0.302058959,0.159047049,0.238682482,0.332890097,0.732788211,0.630717027,0.2120317,0.631540932,0.013196648,0.134876035,0.747756458,0.877326076,0.586579541,0.881448408,0.242947745,0.385337468,0.273140407,0.113777263,0.651410847,0.097874578,1.576956377,0.055913439,0.216779728,0.17580214,0.884895888,0.549461899,0.197400681,0.976899495,0.292282312,0.269819883,0.122493182,0.247114097,0.094116774,0.337461608,0.604871012,0.255925503,0.225275575,0.284982444,0.413806944,0.151640895,0.387578512,0.157032532,0.517865422,0.029709927,0.506868948,0.175726155,0.324725803,0.104994889,0.057592244,0.125432482,0.094178614,0.053453726,0.158781384,0.283654153,0.049917651,0.215841151,0.075336647,0.057964906,0.11477459,0.006480734,0.012728989,0.025838834,0.034484915,0.045414968,0.005050029,0.017603499,0.017209077,1.186054468,0.322054475,5.501853519,0.532534912,0.360089272,0.169701852,1.602220032,0.463303316,0.081228896,0.158277826,0.069329236,0.047954529,0.067998998,0.107603086,0.485936297,0.042576327,0.098140397,0.054060332,0.071366479,0.085510916,0.025411065,0.053883054,0.021704959,0.00696838,0.013321167,0.006515903,0.057760169,0.015332371,0.02343039,0.005528041
E08000026,2014,0.449137375,0.522509813,0.548122586,0.260877039,0.177146947,0.147822703,0.576822201,1.19288657,0.27589678,0.324403345,0.171926904,0.273690202,0.349742706,0.751582735,0.692767122,0.223162627,0.690440913,0.014678802,0.130919009,0.806693995,0.915769035,0.635145654,0.950954604,0.267656025,0.413136261,0.310697118,0.120753605,0.714583776,0.093235843,1.778464584,0.058534601,0.225471658,0.188022358,0.920888653,0.590069683,0.1983674,1.143219254,0.337839767,0.278013723,0.106586255,0.270766564,0.096877707,0.34094108,0.662060528,0.285518859,0.226406879,0.294447561,0.42547103,0.154328455,0.414524146,0.159024117,0.557873754,0.028026656,0.578626947,0.1651562,0.300420043,0.110848815,0.058386206,0.149738007,0.106211223,0.059376799,0.175467144,0.292565771,0.053815665,0.200841354,0.06822261,0.059568104,0.13153264,0.007712316,0.011775329,0.022903254,0.039001856,0.044421219,0.00535944,0.020844465,0.020773914,1.371106329,0.375305306,6.146943055,0.627751837,0.39325169,0.179654009,1.668169836,0.473243581,0.085857528,0.174526816,0.073951775,0.054731513,0.069386796,0.130266664,0.509401348,0.036055996,0.083361374,0.0453181,0.060053842,0.071466541,0.027808495,0.060380391,0.027701212,0.009213678,0.011369106,0.006887065,0.070761029,0.01703621,0.024686932,0.006682951
E08000027,2014,0.512203321,0.574207271,0.586515063,0.292672951,0.183105973,0.162541164,0.591452705,1.371792623,0.297241529,0.364255616,0.199048209,0.331172544,0.366542286,0.787752591,0.783780845,0.246231759,0.785708893,0.016163415,0.125704385,0.9082744,0.988944821,0.720712139,1.056755819,0.315171687,0.472784083,0.37466795,0.132287458,0.850129816,0.083147569,2.123864084,0.064482422,0.238447755,0.212006685,0.970068133,0.665313206,0.202222562,1.410311914,0.415277066,0.291561234,0.086607441,0.305934496,0.107673118,0.350330749,0.746284402,0.324323493,0.22950656,0.309128294,0.440899123,0.156498854,0.462459351,0.165128382,0.621896309,0.025317544,0.681194629,0.154307898,0.285783559,0.123531293,0.059189208,0.177371129,0.123280542,0.071750001,0.202172138,0.313509771,0.060709774,0.174250068,0.058269099,0.063922384,0.161521738,0.010336447,0.01244814,0.015746805,0.04511489,0.046858037,0.005754261,0.025127476,0.028442938,1.489147285,0.359395749,6.570380805,0.715063424,0.396411059,0.178367887,1.682948028,0.431678175,0.085059152,0.173489026,0.072734742,0.056696696,0.069945609,0.137468609,0.495002352,0.036111132,0.083089033,0.046043835,0.060739726,0.072979041,0.026955171,0.059369062,0.031931968,0.011959586,0.01128967,0.006870827,0.090793874,0.017960754,0.027914249,0.008282387
E08000028,2014,0.429482872,0.505007686,0.541129734,0.255327498,0.17784392,0.146018737,0.572269398,1.14759433,0.274462135,0.317311229,0.169634592,0.259097918,0.34103875,0.75228791,0.666489188,0.222735623,0.664295738,0.013581082,0.135390919,0.791837992,0.899927342,0.627741635,0.935504716,0.262774796,0.406873568,0.296975388,0.119287664,0.690221712,0.101047469,1.708722336,0.058790273,0.225500957,0.189112551,0.923607671,0.576917811,0.203994943,1.04777605,0.318130119,0.280088699,0.120886323,0.266934295,0.099177973,0.341899392,0.64124877,0.270327606,0.233962768,0.294971188,0.41478717,0.157013909,0.404055658,0.15907027,0.549933158,0.029106326,0.543683713,0.178018236,0.338799426,0.109765347,0.061118756,0.128901373,0.097823888,0.060608728,0.170634723,0.301969354,0.053222233,0.21766689,0.075237056,0.060538176,0.124147269,0.007528151,0.013124718,0.025346597,0.038207792,0.044483902,0.005519212,0.018602269,0.020201854,1.199392798,0.293596169,5.54429373,0.524952746,0.341783372,0.161373409,1.59884106,0.43094254,0.080364083,0.147483221,0.06580519,0.042108182,0.065569011,0.10735355,0.464586945,0.039574364,0.091218159,0.049939873,0.066007437,0.078793351,0.025206956,0.051021131,0.022852603,0.00647379,0.012456287,0.006213676,0.074582791,0.015043508,0.023895243,0.006032633
E08000029,2014,0.538275785,0.587329291,0.606003457,0.288596694,0.200830658,0.169668791,0.634694159,1.279603825,0.299959875,0.373761123,0.201786275,0.339131642,0.391604122,0.778908811,0.790193198,0.25149283,0.796595604,0.01896266,0.129504951,0.915875392,1.014346167,0.733728481,1.057543644,0.315121566,0.483252138,0.367991255,0.142919134,0.849831483,0.091579124,2.117477211,0.062420114,0.248259994,0.215582462,1.002986072,0.65549306,0.208563611,1.461920366,0.416891344,0.297087797,0.079136172,0.307064312,0.108058575,0.377981032,0.72853096,0.323086691,0.242868043,0.329636438,0.460529092,0.164201057,0.477722262,0.165982551,0.634682828,0.026227507,0.659924793,0.157832177,0.299063419,0.131805443,0.062080887,0.192152386,0.129397162,0.071162185,0.208221315,0.278029613,0.063369891,0.183945688,0.061345553,0.068053213,0.149791469,0.009881491,0.014764501,0.019163335,0.046826898,0.04875192,0.006070265,0.023740845,0.026097581,1.49607278,0.373444249,6.883515334,0.786497194,0.413620154,0.169018239,1.647679427,0.448322216,0.084970795,0.187261814,0.073771015,0.073688712,0.068594116,0.131892923,0.505241804,0.037371851,0.086300302,0.048249846,0.06370105,0.076826402,0.029849134,0.062015858,0.034817784,0.010982062,0.011458049,0.007033643,0.071441714,0.017793296,0.028261755,0.006937784
E08000030,2014,0.468171369,0.534082573,0.558540086,0.275592462,0.176908291,0.154498844,0.576276949,1.311259198,0.285460948,0.341904466,0.185814588,0.295848521,0.348244825,0.773174626,0.730160525,0.234255817,0.727839233,0.01459805,0.127700834,0.850516166,0.94147051,0.679317342,1.001589647,0.292297838,0.437593438,0.338657578,0.123333613,0.767551648,0.089725183,1.935758495,0.062096268,0.230242173,0.199652686,0.940067099,0.628160453,0.201425243,1.221847311,0.371959746,0.282992444,0.103449613,0.288393829,0.103369377,0.338605719,0.697406843,0.300035198,0.227072164,0.295217112,0.418394849,0.154755087,0.430239279,0.160715153,0.585987754,0.02662066,0.615061025,0.167991923,0.301799127,0.115522006,0.058224204,0.146306453,0.108467456,0.06672801,0.188846525,0.32259106,0.056593135,0.186801469,0.065331432,0.061657054,0.143221716,0.009053247,0.012208417,0.019537481,0.042196581,0.044207748,0.005507033,0.022296879,0.02430926,1.359185407,0.318567464,5.973712994,0.605670806,0.356538673,0.171298517,1.636172762,0.400000765,0.083855936,0.156518972,0.068833557,0.047294724,0.066868361,0.122974256,0.47317395,0.039459401,0.091205032,0.050426954,0.06673348,0.079885658,0.026379827,0.05494813,0.027860277,0.008324704,0.012370192,0.006520142,0.087292253,0.016699731,0.025384832,0.007189618
E08000031,2014,0.441027245,0.512797102,0.544539949,0.265671031,0.175793931,0.147640866,0.568914292,1.229804275,0.275400155,0.32610319,0.177669507,0.272386582,0.342235191,0.765414657,0.679055571,0.226981845,0.682892838,0.014162248,0.135877278,0.813365939,0.918735407,0.645407059,0.956615302,0.272759477,0.421546586,0.309562919,0.118854351,0.735045962,0.095003366,1.796666712,0.060680335,0.225906515,0.195440335,0.925949592,0.596146908,0.202346966,1.116767059,0.342462365,0.282134673,0.105758821,0.275469119,0.104698383,0.348774732,0.673530973,0.278175073,0.230299071,0.29553905,0.422197349,0.152892367,0.414011092,0.163421945,0.560400508,0.028438211,0.567165991,0.17204897,0.328056254,0.11480439,0.057579529,0.132078217,0.102758574,0.065233149,0.177275078,0.328561096,0.054812976,0.207126946,0.072960229,0.060908536,0.130158685,0.007950282,0.013580878,0.021802069,0.039345557,0.047853177,0.005288672,0.019512523,0.021647166,1.304733292,0.318725348,5.735544488,0.566025107,0.353272425,0.17049,1.625445978,0.415500662,0.080810432,0.154110054,0.067634298,0.050089331,0.066624509,0.115192862,0.469344863,0.037153714,0.08565358,0.046879337,0.061945812,0.074173988,0.026669858,0.052122752,0.023864084,0.007362021,0.011702215,0.006131008,0.078657393,0.015322551,0.023496225,0.006449379
E08000032,2014,0.435140931,0.505612859,0.530820588,0.253102921,0.171503579,0.144879205,0.565113773,1.199588303,0.275762785,0.320874864,0.167663457,0.266574781,0.336992905,0.742638268,0.686273205,0.220798262,0.676645081,0.013770641,0.124446128,0.790365409,0.898450999,0.624646628,0.933218116,0.264614453,0.40264991,0.304049547,0.117544004,0.680097962,0.094223193,1.73701827,0.058574189,0.221826087,0.183772398,0.901451585,0.582722804,0.197685172,1.071830662,0.323601931,0.270874199,0.120735435,0.262370503,0.095038068,0.325980668,0.619543357,0.279119101,0.221586855,0.282817483,0.408272475,0.152594261,0.404311278,0.153087735,0.542699938,0.027284708,0.564778956,0.177089112,0.297930242,0.105277308,0.060437121,0.137363505,0.097399556,0.056294996,0.172735547,0.289646051,0.052043622,0.199399473,0.065419385,0.058806364,0.12890521,0.007366196,0.012371148,0.022728052,0.037898387,0.039230725,0.005099261,0.019773337,0.020651414,1.209321701,0.29932529,5.613353088,0.547620066,0.349733334,0.163764634,1.609180152,0.411189996,0.083919464,0.155002258,0.068188769,0.042735577,0.066032849,0.11261035,0.470148966,0.043803472,0.101107369,0.055699538,0.073629241,0.088228616,0.02543552,0.055469372,0.023423019,0.007754621,0.013674078,0.007138437,0.070682339,0.016003639,0.02613138,0.006362975
E08000033,2014,0.517209146,0.580536958,0.587989613,0.291941621,0.181443823,0.163177409,0.594028021,1.442038511,0.296855168,0.366754343,0.196864829,0.337216563,0.37152824,0.789869021,0.786604473,0.246741091,0.794433886,0.017005169,0.124206998,0.903014933,0.995317269,0.715423833,1.058917522,0.315571368,0.470387169,0.376390308,0.134175296,0.847453594,0.080449867,2.137239882,0.064108158,0.238069694,0.212110583,0.973659888,0.664727425,0.199963477,1.415167225,0.419109948,0.28961083,0.085907361,0.29932791,0.105866585,0.344903649,0.718201989,0.328758181,0.225795389,0.303192419,0.442047321,0.15640629,0.46284504,0.164530669,0.614369182,0.024463102,0.695853361,0.156559227,0.260321242,0.12151971,0.06003528,0.189628215,0.1203929,0.065899935,0.20282454,0.314457308,0.058968067,0.170280744,0.054927868,0.06260748,0.163162816,0.009731168,0.012866726,0.014545568,0.04503915,0.04469208,0.00558849,0.025708442,0.027791467,1.533932098,0.366739114,6.648031149,0.733831998,0.412948838,0.181930032,1.731238865,0.426905617,0.088192144,0.183095711,0.074699437,0.061463128,0.070806182,0.142344636,0.515026116,0.036854903,0.084709483,0.047027009,0.062033145,0.074530373,0.027369349,0.064179649,0.031278623,0.012509041,0.011479157,0.007490521,0.085682684,0.018089281,0.028998896,0.00919747
E08000034,2014,0.46716731,0.534348974,0.563751514,0.264518915,0.183006704,0.155800399,0.596340846,1.25291806,0.283795153,0.335734458,0.17889142,0.288959356,0.360450978,0.760933905,0.714516862,0.231816703,0.713482772,0.014940946,0.12969797,0.835069725,0.938607999,0.659602771,0.980199443,0.282980282,0.429953162,0.322081463,0.129406474,0.742797043,0.097758359,1.853028975,0.059351119,0.232160444,0.198132465,0.952215879,0.607371959,0.204601178,1.200218606,0.353341763,0.28321942,0.108996482,0.277530474,0.100632865,0.355640356,0.678681926,0.291481941,0.233941228,0.305133416,0.430942583,0.160309076,0.431333269,0.157729514,0.573250984,0.028000356,0.608131886,0.172366951,0.315657293,0.11415371,0.062642136,0.153647842,0.10778341,0.061831751,0.184979163,0.296185197,0.056112708,0.203303435,0.068781981,0.062591705,0.135738228,0.008040728,0.012955857,0.022993114,0.040968861,0.043705357,0.005565204,0.021175094,0.022567022,1.3498521,0.326601977,6.091035981,0.62466596,0.375978921,0.168242705,1.670717549,0.421269993,0.085442209,0.167529722,0.071055817,0.053289004,0.067635033,0.124259371,0.495652909,0.038002505,0.087799686,0.048514918,0.06413276,0.076884696,0.027432445,0.058056981,0.027673641,0.008692243,0.011897511,0.007139476,0.075306353,0.016514728,0.026215005,0.007262898
E08000035,2014,0.47842057,0.548218298,0.558690928,0.276802491,0.175147062,0.149328403,0.570180355,1.354701917,0.280684367,0.339469186,0.181534196,0.302360807,0.356203341,0.769430345,0.729578791,0.231439349,0.736856539,0.01599004,0.125277747,0.840077203,0.94576875,0.658774105,0.98836653,0.285282336,0.432137307,0.344732437,0.122742609,0.780836157,0.082572386,1.943705858,0.062166966,0.227568536,0.195815939,0.928202128,0.622720181,0.193604357,1.270921099,0.377508429,0.278786081,0.092178333,0.276705637,0.100499602,0.331359341,0.686291988,0.310014523,0.219064351,0.290303173,0.432657201,0.150075946,0.431748984,0.163656406,0.574533126,0.025616501,0.63179283,0.153590462,0.262469207,0.113112081,0.056932842,0.170039688,0.11019136,0.064713064,0.184909796,0.312564265,0.054914135,0.178553174,0.059750683,0.059255053,0.149519921,0.008560116,0.012690535,0.016063144,0.041978427,0.043691918,0.005005397,0.023701934,0.022826943,1.521098617,0.413905394,6.540270052,0.711820599,0.436550827,0.199223401,1.750140884,0.476287832,0.087094357,0.200354176,0.08081872,0.06642506,0.074724767,0.149487245,0.539225115,0.03426996,0.079011548,0.043131274,0.056983551,0.068047941,0.029543192,0.065130373,0.030644159,0.011862388,0.010812766,0.007381681,0.082994964,0.018149001,0.02604745,0.008203108
E08000036,2014,0.510756341,0.58046056,0.588527199,0.295228081,0.178527947,0.164348206,0.586412458,1.484254547,0.298268676,0.366538922,0.200393309,0.341980602,0.365677767,0.801302186,0.7976473,0.246693783,0.79906775,0.016459547,0.123745876,0.912010674,0.992266598,0.72910598,1.07778166,0.323254101,0.472546523,0.383316953,0.131693321,0.86759915,0.079564943,2.178526682,0.065905744,0.237237913,0.215524437,0.975570739,0.677774589,0.199546658,1.404554769,0.426278039,0.292022969,0.08142831,0.311565869,0.107695378,0.343047854,0.745429347,0.333026685,0.223664259,0.301169344,0.436686891,0.155373508,0.461799188,0.167061055,0.621125978,0.024307437,0.694995355,0.155464691,0.270687255,0.122271087,0.058853757,0.173866293,0.119562234,0.070255004,0.206901251,0.341773132,0.059076917,0.16658844,0.056773265,0.061767026,0.165514209,0.010262369,0.012162074,0.013976222,0.045751916,0.044857946,0.005632937,0.025798404,0.028923383,1.529033511,0.360518141,6.506970769,0.709022201,0.393216991,0.180598075,1.702181488,0.408892552,0.086777689,0.172778888,0.072694368,0.055214693,0.069643674,0.142857131,0.494319795,0.034699251,0.080155285,0.044149524,0.05842227,0.070039265,0.027156545,0.059340975,0.033136993,0.012911881,0.010845059,0.006818319,0.099379219,0.018289247,0.02738142,0.008236822
E08000037,2014,0.52657095,0.594663321,0.600939701,0.305449099,0.182011962,0.165127446,0.594287534,1.560390455,0.301963709,0.375918407,0.206332389,0.351835836,0.372503819,0.81485774,0.81780007,0.254279104,0.822402024,0.017724566,0.124682168,0.931101009,1.016182247,0.752523602,1.102334984,0.33029061,0.482849449,0.395560179,0.129885902,0.887083386,0.076055869,2.255250795,0.068236977,0.241735905,0.220621018,0.984488069,0.695883178,0.201122659,1.449704431,0.447003366,0.297784867,0.076284824,0.313358096,0.109974862,0.336806303,0.751000197,0.344412446,0.224475934,0.30429397,0.444093328,0.153385745,0.470101405,0.172063403,0.63484224,0.023826593,0.716562962,0.156076346,0.256744754,0.124768015,0.058132257,0.183882868,0.12299299,0.074546664,0.213087184,0.361938792,0.060719634,0.159918155,0.054590044,0.063017046,0.170205934,0.010358266,0.012252242,0.012120858,0.04705261,0.045428209,0.005375724,0.027771905,0.028672165,1.627620139,0.391320028,6.834051968,0.75314574,0.411530143,0.190087259,1.770296623,0.424854934,0.088996547,0.189642297,0.076844479,0.057954945,0.072814623,0.151161919,0.513462845,0.033344517,0.076667321,0.04236816,0.055790889,0.066909387,0.027503338,0.064946566,0.033549479,0.013030229,0.010409563,0.00713769,0.107817374,0.018403875,0.028615538,0.009306093
E09000001,2014,0.442327792,0.546945137,0.623842659,0.243278808,0.187997824,0.168848434,0.649275296,1.269018268,0.251705669,0.29055313,0.166059116,0.267176287,0.395994177,0.753433274,0.626508959,0.219751945,0.708867972,0.014009185,0.154190736,0.820482933,0.910234783,0.627563878,0.952900364,0.26365222,0.428578502,0.277597147,0.143347795,0.707926216,0.127557015,1.694447644,0.052815863,0.243373473,0.206786899,1.0238496,0.541404093,0.220738965,1.138068138,0.300039655,0.309700605,0.090243755,0.291998724,0.101862276,0.458309453,0.78535951,0.280751391,0.266569632,0.330774411,0.486267179,0.177271512,0.440744555,0.156112087,0.560525005,0.029978189,0.633886847,0.177174351,0.360189969,0.116009336,0.063111744,0.140694345,0.097362223,0.066523354,0.17660732,0.333846881,0.057838951,0.264902219,0.081826201,0.064779886,0.132199806,0.006250525,0.023684551,0.037238342,0.03907244,0.065060207,0.006175471,0.021197838,0.022415103,1.97706939,0.512583729,7.688714447,0.823013942,0.442484535,0.200841401,1.960848853,0.648931297,0.097113884,0.217544338,0.08288111,0.123074417,0.07880929,0.150487146,0.615430875,0.027212276,0.050385414,0.034174665,0.040585729,0.049368703,0.046934053,0.074432114,0.017235102,0.008465758,0.007604526,0.007365709,0.149814798,0.017895996,0.022921826,0.008516585
E09000002,2014,0.399972016,0.475601507,0.504204531,0.276497593,0.166668956,0.127482508,0.553782713,0.967580786,0.272581945,0.311038402,0.158065251,0.214310652,0.327878443,0.749728813,0.589344482,0.206663381,0.605576124,0.012413508,0.145467346,0.734216181,0.898856208,0.551695902,0.852528861,0.228816685,0.384444219,0.257334694,0.111314919,0.713994989,0.102311822,1.481418947,0.055642773,0.214749511,0.170772698,0.908936956,0.539300117,0.198635104,0.908489241,0.278457187,0.266210133,0.155377886,0.235389604,0.101313972,0.346018586,0.571065476,0.242394139,0.228046787,0.295010863,0.451134031,0.146476751,0.385910111,0.178708844,0.493661436,0.031982904,0.479166738,0.18288425,0.372289206,0.103745547,0.054918807,0.11603654,0.090614128,0.049298118,0.148241363,0.273837981,0.049116172,0.252214622,0.089111245,0.058089684,0.106180878,0.005706422,0.011802167,0.024341553,0.032473617,0.053728391,0.004047728,0.015937503,0.012853856,1.24991964,0.362872507,5.616779504,0.521003011,0.407912134,0.19393985,1.844440498,0.582124483,0.085869927,0.174509884,0.077452654,0.061432946,0.081543603,0.105935896,0.552850107,0.051684085,0.118786418,0.063591029,0.084105784,0.099827488,0.027505841,0.054409025,0.019757558,0.005319817,0.016472873,0.006863603,0.055678873,0.014572359,0.026358462,0.006094547
E09000003,2014,0.486011717,0.557745072,0.57945168,0.261228084,0.202649639,0.159588052,0.654963921,1.108387847,0.291258927,0.347062299,0.171925968,0.271493279,0.400579501,0.763790851,0.705689008,0.233098257,0.716805322,0.016187105,0.141176965,0.820201228,0.980211276,0.62398873,0.960516014,0.265975828,0.429158752,0.30347488,0.143169005,0.729743595,0.116664281,1.722907133,0.058197983,0.239138032,0.188018499,1.003764613,0.58869211,0.213356764,1.193574606,0.329028502,0.287857864,0.124154782,0.260345211,0.103169614,0.398954576,0.655520096,0.282830077,0.248572621,0.338046489,0.505958238,0.173661781,0.4456298,0.167333207,0.557431456,0.03054522,0.584822818,0.178732473,0.316745163,0.114693368,0.071805955,0.164108939,0.111450793,0.057699415,0.18528381,0.248506711,0.059131344,0.249929631,0.074149783,0.065803019,0.124433238,0.006679877,0.020567038,0.030078869,0.040638981,0.044255154,0.005029501,0.01867886,0.020203255,1.447818953,0.444782129,7.408461079,0.770384766,0.492593075,0.197065181,1.965951638,0.573422269,0.100646933,0.231927464,0.090007766,0.110748421,0.080212616,0.135604854,0.633635294,0.043854791,0.100934613,0.055248532,0.072956911,0.087226181,0.040472115,0.068574603,0.027391376,0.008902085,0.013804396,0.009343422,0.052102548,0.018624509,0.032699815,0.007993461
E09000004,2014,0.536785212,0.596153623,0.60366354,0.30809479,0.200799412,0.160794087,0.626766351,1.25201115,0.300143398,0.37552009,0.200598397,0.317874247,0.392767231,0.793626946,0.76201265,0.249057984,0.792259084,0.018927988,0.141575802,0.905015706,1.032709685,0.701273542,1.038823009,0.298711747,0.477871417,0.369642972,0.14040021,0.875869686,0.090535593,2.075661767,0.062997036,0.248320756,0.207488832,1.010005033,0.660961273,0.208084727,1.438406269,0.409459992,0.294720301,0.100582146,0.298356244,0.110756189,0.381427189,0.722801575,0.325879853,0.243741951,0.33172133,0.496964581,0.159823609,0.479702341,0.185121472,0.613997689,0.028416505,0.661018019,0.153528923,0.326451619,0.128075005,0.058193864,0.201951863,0.127992275,0.070420457,0.194154181,0.27787992,0.059947509,0.206496102,0.070500972,0.068158221,0.15415305,0.009209851,0.01365231,0.016604589,0.044109576,0.055309426,0.005293191,0.024202437,0.02230008,1.703352245,0.481521736,7.654948789,0.889481011,0.523936676,0.218633616,1.986135064,0.610811031,0.096022102,0.237836577,0.091240614,0.097988407,0.085515776,0.155466742,0.620166206,0.044475442,0.102393842,0.05683809,0.07487414,0.090020283,0.033939715,0.072307047,0.03884721,0.011414034,0.013836071,0.008173954,0.075584045,0.019415977,0.032472416,0.008362733
E09000005,2014,0.402796215,0.489997997,0.554535773,0.228329754,0.18598801,0.138575136,0.634739746,0.880091051,0.267227969,0.282713966,0.146100131,0.191790753,0.378454841,0.748820695,0.579124103,0.207735475,0.583319216,0.012188026,0.163635987,0.717069237,0.899475942,0.541826781,0.852490314,0.222071139,0.368902434,0.225774879,0.12395704,0.669928784,0.137971283,1.292485676,0.048967422,0.231949689,0.171677367,0.976609494,0.500010433,0.219539706,0.831919721,0.242843348,0.2910914,0.157200315,0.232729445,0.09713597,0.421337907,0.610538266,0.225822254,0.266909658,0.344716107,0.515612596,0.171967246,0.39458769,0.16296913,0.496630836,0.039840907,0.459339022,0.199345491,0.450036994,0.109346504,0.068874146,0.113511936,0.102215994,0.046972263,0.150404824,0.242179144,0.050349185,0.302569097,0.10700871,0.062138967,0.089714941,0.00419378,0.014480733,0.04532566,0.028959214,0.060492155,0.005451832,0.012189944,0.01134227,1.150289578,0.379776231,6.123351975,0.59882,0.446373642,0.189124772,1.891455392,0.68060862,0.096043546,0.187407344,0.081204181,0.092338448,0.081084587,0.095528568,0.617942615,0.04197958,0.096558229,0.052656835,0.069642433,0.083028801,0.031748595,0.058778511,0.018082785,0.005616621,0.013218566,0.006816249,0.035268412,0.015251156,0.02471755,0.00449279
E09000006,2014,0.575509446,0.623352008,0.634586317,0.302390974,0.219846584,0.173875642,0.676010243,1.282731577,0.307560272,0.392022073,0.20074621,0.342068656,0.42483576,0.795650384,0.796739345,0.259065812,0.829871869,0.021706034,0.143641013,0.929108586,1.067025976,0.724475919,1.066054682,0.30849763,0.494299209,0.376560034,0.153508542,0.874668779,0.098272456,2.12859044,0.064784914,0.258734677,0.213196167,1.045170326,0.666954583,0.216827451,1.562129237,0.417389764,0.306222526,0.096985143,0.300353366,0.110829143,0.400533004,0.738661269,0.337629172,0.255292746,0.34737068,0.507610709,0.173407585,0.502346242,0.180422019,0.637132994,0.028329946,0.684841738,0.160651115,0.303234479,0.133697473,0.065875516,0.216176694,0.134262705,0.070096054,0.207698044,0.262633962,0.064309292,0.207807874,0.064407703,0.071984756,0.152667411,0.008853617,0.017020206,0.020254811,0.047306022,0.051095135,0.005917484,0.024193258,0.024797791,1.77166645,0.484831678,8.381188387,0.99179277,0.543716129,0.209308259,2.019888176,0.60144139,0.099647032,0.268509354,0.094615139,0.117230686,0.082461401,0.158454444,0.651247719,0.041887203,0.096777437,0.053266191,0.070353883,0.08432045,0.037139459,0.075935139,0.04081129,0.012006681,0.013146583,0.009140979,0.07223782,0.020854594,0.034773294,0.009604988
E09000007,2014,0.468161072,0.570494405,0.603075697,0.257831472,0.204666927,0.152281588,0.656164489,1.247497787,0.279789718,0.323729799,0.165091924,0.275528843,0.42210513,0.765447094,0.702082267,0.227491204,0.71145803,0.018336509,0.153792378,0.791634853,0.982128589,0.60137092,0.944804629,0.25815103,0.412533309,0.292114187,0.141633172,0.759481841,0.11098869,1.712796605,0.05989558,0.2353597,0.186187708,0.998049473,0.570200464,0.219396781,1.262715495,0.322782591,0.290668714,0.094345318,0.2507286,0.096936284,0.41724821,0.64776283,0.288353159,0.246645079,0.343870187,0.562467384,0.164575218,0.434171491,0.177190956,0.543737205,0.028916252,0.580183487,0.17119491,0.28752899,0.123342625,0.066099158,0.169044361,0.115454285,0.061259035,0.18242624,0.293841773,0.053456223,0.24046819,0.074406907,0.061986562,0.130273347,0.005503491,0.013729813,0.033699302,0.036631357,0.044508221,0.004712146,0.018519677,0.018626617,1.774060218,0.541350353,8.292478385,0.954059507,0.577312043,0.234374702,2.138768607,0.678463608,0.106620928,0.326759456,0.105977159,0.125633671,0.087331888,0.16549707,0.748779614,0.035865953,0.082423179,0.045058265,0.059539983,0.071184976,0.036349526,0.079094928,0.027253683,0.01002741,0.011296847,0.009226913,0.051209557,0.019659563,0.02948108,0.010546519
E09000008,2014,0.464942585,0.549227539,0.567180162,0.2887601,0.188106257,0.143930211,0.604665784,1.098678782,0.283616128,0.337412042,0.179631239,0.259478309,0.375758069,0.773519007,0.657419411,0.22684287,0.692152721,0.015602769,0.155288878,0.813286484,0.978646252,0.611803602,0.933896038,0.259431712,0.430527953,0.305514046,0.131761389,0.828526995,0.105796772,1.726094099,0.057006522,0.235288327,0.189659611,0.98947627,0.592480928,0.208291617,1.160408613,0.343945307,0.286287781,0.126762054,0.269134186,0.108870511,0.403552297,0.650455381,0.28025083,0.245246848,0.331073453,0.50090698,0.158047244,0.436884691,0.190916916,0.545247265,0.032912509,0.566616656,0.165238849,0.392800812,0.11878168,0.057269991,0.158380293,0.116017892,0.060599928,0.166622005,0.268608106,0.052765489,0.256427973,0.093991403,0.065033291,0.131106111,0.006732644,0.014520627,0.022806273,0.035532887,0.060798908,0.004601161,0.018635936,0.017765562,1.544072124,0.47067375,6.753131652,0.76680842,0.506557289,0.219954151,1.956399463,0.651188721,0.091231287,0.222958407,0.088594525,0.109668462,0.086144719,0.130855185,0.625321312,0.045224445,0.104299079,0.057098705,0.075360168,0.089981306,0.03335543,0.064623585,0.027547483,0.009019483,0.014247072,0.007553738,0.057516663,0.015932627,0.02881084,0.00761089
E09000009,2014,0.440430731,0.528622254,0.572911092,0.24488621,0.193413278,0.14584006,0.649212603,1.00345554,0.281340679,0.311763493,0.153892876,0.231360328,0.395924961,0.759653695,0.64174556,0.220345442,0.64544609,0.014794937,0.152425409,0.76091567,0.942579218,0.57240238,0.89949432,0.237563957,0.394573693,0.259945907,0.137604227,0.68264953,0.13211767,1.49284618,0.05311243,0.232597992,0.179214079,0.998057715,0.541232108,0.214720306,1.030739738,0.275382837,0.286506291,0.146635877,0.242643151,0.098122004,0.414893074,0.631864372,0.255138987,0.2560113,0.345352387,0.508614699,0.176883473,0.41789015,0.164875834,0.524964552,0.033552823,0.530336624,0.19310635,0.371382902,0.111212313,0.072712771,0.143978223,0.1054861,0.052499621,0.167076879,0.245609571,0.054732456,0.281436556,0.086583639,0.063252303,0.105616231,0.005398028,0.016681022,0.042810228,0.035881008,0.048798319,0.005354215,0.015112438,0.014217666,1.317813887,0.420368908,6.975954161,0.703268424,0.473317638,0.19134835,1.952240731,0.647652927,0.096660883,0.225246482,0.087586439,0.094850291,0.081267731,0.115526748,0.643619079,0.042406773,0.09798291,0.052992853,0.070023337,0.083566575,0.034935196,0.068206712,0.021593574,0.00763185,0.013450295,0.008391293,0.04419364,0.018087037,0.02880753,0.00658809
E09000010,2014,0.457657621,0.534877038,0.557371465,0.277769997,0.18642958,0.143428137,0.59889376,1.091102664,0.281847601,0.336169374,0.174299714,0.256054851,0.370275697,0.762977447,0.659424026,0.22521208,0.683632165,0.01498752,0.147477804,0.799144585,0.960654787,0.606070942,0.928767638,0.257982241,0.422304795,0.297864129,0.127505093,0.805815931,0.102262791,1.697883882,0.057648043,0.230743482,0.184594467,0.959334118,0.585149641,0.20633199,1.115932655,0.34130409,0.28106129,0.122448022,0.258792843,0.105156542,0.377821014,0.645311524,0.275214815,0.24092614,0.326002155,0.494674218,0.15451685,0.429819992,0.182322085,0.535980351,0.031571198,0.557878798,0.165401921,0.365480304,0.115429462,0.057766772,0.149754406,0.114150584,0.059414337,0.167113152,0.271316654,0.053455713,0.247289235,0.088499261,0.062933319,0.126975464,0.006638342,0.01242006,0.022799848,0.035844153,0.055483674,0.004491111,0.018744399,0.018067034,1.489135936,0.457507637,6.6702036,0.742349686,0.50145932,0.218347209,1.961381258,0.605657899,0.094782649,0.216049841,0.087005155,0.103108854,0.086293657,0.13241892,0.620602515,0.046859853,0.10774838,0.059066308,0.078165996,0.093247407,0.032000575,0.06252589,0.026413644,0.00819347,0.014717913,0.0080334,0.058390619,0.016186739,0.029645857,0.007759041
E09000011,2014,0.453024581,0.536854823,0.552873947,0.280853125,0.183279134,0.138772622,0.596779149,1.142779236,0.280096852,0.3315343,0.166608723,0.256710501,0.37122861,0.772005126,0.654156163,0.222030909,0.68125624,0.015951663,0.149896643,0.779381215,0.958283486,0.58741705,0.915507211,0.248837186,0.409422757,0.298068282,0.125950758,0.786582723,0.100925084,1.675137815,0.058824062,0.228852488,0.179323204,0.958329899,0.57805626,0.20337789,1.145975439,0.322912374,0.282566917,0.13025127,0.253162633,0.10109568,0.364673895,0.636449697,0.279658088,0.235025052,0.315257885,0.490070937,0.155276571,0.420368753,0.182470461,0.528800202,0.030748863,0.574570289,0.169374255,0.330274377,0.112361274,0.059727147,0.159351474,0.110459421,0.056218231,0.164243802,0.281588909,0.051465051,0.240369322,0.083403086,0.06073023,0.127648862,0.006100383,0.01466668,0.022690438,0.036491754,0.05513177,0.004160797,0.019331791,0.016542759,1.600561832,0.496859341,7.056179455,0.796122658,0.531620271,0.229269351,2.03251908,0.66870632,0.094455602,0.247524731,0.092379437,0.12114009,0.088198663,0.141968774,0.657312012,0.043399386,0.099609671,0.053644146,0.070938395,0.084199285,0.035206772,0.070609995,0.026407178,0.009983173,0.013770458,0.008524068,0.056015298,0.017788593,0.029269356,0.009097942
E09000012,2014,0.405968227,0.502274241,0.531846229,0.246913178,0.170437129,0.123416806,0.582357773,1.03768764,0.256321464,0.297432881,0.151001218,0.210028388,0.37441606,0.757503384,0.580663392,0.200930543,0.611857726,0.015032354,0.163203024,0.705293253,0.924710392,0.513281158,0.838950251,0.217922137,0.374061908,0.255175025,0.117783934,0.848819043,0.102205912,1.412796065,0.054475206,0.218033423,0.156546138,0.910529273,0.527505336,0.209269397,0.963874213,0.276204516,0.274173374,0.118523786,0.235820041,0.092460964,0.376055458,0.599695114,0.245415989,0.231519498,0.311080233,0.56608318,0.144294386,0.402720261,0.180190325,0.458420653,0.032335014,0.507646749,0.160008642,0.336825364,0.119490712,0.053838284,0.137564144,0.112541679,0.049119894,0.144056397,0.276517314,0.045749426,0.251002007,0.102494764,0.053806671,0.117677236,0.004345124,0.012231942,0.027835395,0.029682424,0.057410853,0.003602555,0.015773027,0.012667616,1.581756872,0.563850932,6.831224704,0.856390642,0.602720222,0.255769187,2.023121223,0.746996102,0.093425831,0.26255411,0.097059393,0.173051365,0.096167662,0.136357699,0.698553733,0.041210205,0.094503175,0.051461314,0.067816537,0.080868846,0.038628871,0.067242887,0.018559283,0.009888947,0.013093443,0.008091293,0.039709936,0.015410731,0.025369939,0.008139774
E09000013,2014,0.490607025,0.595531355,0.60428924,0.264697169,0.201080971,0.146161363,0.651503024,1.230203323,0.276075865,0.329802216,0.162243203,0.287066904,0.436458907,0.754314191,0.70560726,0.229514217,0.738411126,0.020562083,0.156111936,0.792044224,0.9908685,0.583584401,0.941940833,0.251308929,0.417749055,0.308910696,0.13901095,0.827520815,0.10275978,1.721135231,0.058485726,0.23684365,0.17858494,0.995099805,0.577376851,0.213220855,1.312509034,0.337330065,0.290736114,0.091523815,0.245610937,0.094119338,0.394064895,0.661221239,0.301382018,0.246505851,0.332946565,0.568283333,0.162753879,0.449437143,0.182601723,0.525313605,0.028762943,0.611295554,0.146340038,0.276781749,0.115453766,0.06361722,0.201093101,0.127177755,0.064405878,0.17327328,0.257057877,0.051949618,0.237354289,0.077336424,0.061454788,0.146008573,0.005437646,0.014955974,0.025107024,0.03852514,0.049021165,0.004129614,0.020439056,0.018330118,1.877516652,0.689753209,8.730081262,1.148225598,0.701468505,0.273264273,2.228413197,0.78695549,0.104876989,0.362015578,0.117304779,0.181898189,0.099234891,0.17974772,0.795605785,0.033393537,0.076579108,0.041128246,0.0541316,0.064772226,0.041505303,0.086315341,0.029771293,0.015478655,0.010607494,0.010663263,0.047712122,0.018461103,0.031640405,0.011991152
E09000014,2014,0.437558435,0.534905877,0.553763996,0.258288352,0.179501608,0.136020246,0.601305669,1.138166747,0.269946558,0.321728481,0.163243213,0.246691738,0.37794471,0.787116446,0.643654138,0.217203334,0.668917587,0.015776794,0.157885566,0.768801136,0.950557696,0.57198472,0.912229772,0.243366791,0.40168021,0.289067275,0.122609555,0.829727632,0.101611633,1.61652618,0.05904769,0.227708857,0.17235007,0.954550357,0.568918171,0.208944957,1.097826763,0.314012741,0.283495903,0.109961187,0.254026885,0.098486227,0.368407979,0.645979514,0.274214662,0.238670693,0.322656626,0.535276927,0.148739941,0.420937358,0.184969968,0.509065477,0.03117295,0.565820461,0.163952232,0.345021056,0.116208429,0.057614846,0.154933019,0.108017514,0.055731154,0.158750623,0.294065314,0.049874958,0.248404167,0.089938136,0.057336303,0.131670777,0.005458089,0.013046909,0.026428185,0.032800966,0.05530844,0.003971916,0.018820174,0.017323554,1.626661251,0.517388746,7.041976076,0.802121125,0.558234939,0.235404936,2.072209985,0.709554687,0.096705533,0.25581044,0.09471994,0.118311574,0.092030706,0.148396238,0.673176592,0.04205467,0.09709254,0.053228538,0.070462599,0.084150053,0.034857959,0.069160424,0.023361671,0.010225482,0.013239177,0.008451767,0.054344596,0.01753686,0.027367809,0.009070515
E09000015,2014,0.437224691,0.51962685,0.598277292,0.236924867,0.214616161,0.155949815,0.700281999,0.932040551,0.284171015,0.307445933,0.154482645,0.216499149,0.406489795,0.764800452,0.632487997,0.226654995,0.627520065,0.014135015,0.157415562,0.76918293,0.954874675,0.596516405,0.909751669,0.242507428,0.398292586,0.236041243,0.142423072,0.615570052,0.162353187,1.42126264,0.048627206,0.24504329,0.189359179,1.034753483,0.532525972,0.231197507,0.941564697,0.25432992,0.299211508,0.158617688,0.241403941,0.099607686,0.45650157,0.656102491,0.237192064,0.27928837,0.375538895,0.49487847,0.203445725,0.424232649,0.157285499,0.542527368,0.040895679,0.503088473,0.207415937,0.437210376,0.116566828,0.080874479,0.135393578,0.106824181,0.052816799,0.168845063,0.219395922,0.056781429,0.307664221,0.102748308,0.070542089,0.085491731,0.005625613,0.018081156,0.054636338,0.034534806,0.050792386,0.007463761,0.012689247,0.012742785,1.096170441,0.323827717,6.617397557,0.607706835,0.425819135,0.163257717,1.904073037,0.593683174,0.101442011,0.203609334,0.082763942,0.07566703,0.073221128,0.090825057,0.613243302,0.042244598,0.097138344,0.053525224,0.070705798,0.084464887,0.031691543,0.063102462,0.021167767,0.005697748,0.013242417,0.007331518,0.04285169,0.016387105,0.027045362,0.004327424
E09000016,2014,0.557922025,0.608943486,0.621705365,0.307819394,0.206600576,0.171089767,0.647127466,1.367837035,0.308101753,0.382909629,0.204560186,0.338745948,0.404988855,0.804645947,0.799412699,0.257933956,0.819204545,0.019162507,0.134286103,0.934987534,1.046679398,0.735123709,1.075347284,0.315228426,0.492053768,0.377448293,0.145237,0.865678287,0.092213383,2.157818382,0.064093653,0.254834623,0.218175352,1.022661717,0.673551618,0.214091093,1.508048008,0.422828064,0.303314524,0.096818168,0.30258948,0.110293054,0.382030257,0.750964475,0.335954291,0.248867328,0.331357862,0.480731642,0.169911462,0.492526575,0.174607008,0.641947508,0.027952438,0.693280984,0.160961205,0.297982864,0.131955636,0.063842309,0.209517089,0.13040262,0.073426926,0.209296572,0.288873036,0.063890103,0.190333099,0.062702348,0.070356979,0.156019476,0.009843543,0.015053879,0.018069484,0.048135278,0.050022774,0.006060227,0.025303772,0.025016204,1.765004845,0.46065066,8.006168005,0.914590287,0.511478746,0.2116762,2.000905005,0.541953756,0.099920062,0.237462278,0.090967002,0.091362696,0.083825345,0.162338304,0.616308502,0.041395291,0.095692252,0.052990129,0.069798702,0.083926388,0.035892071,0.074787265,0.040774431,0.013369591,0.01292846,0.00896374,0.081104985,0.020310815,0.033022044,0.009286153
E09000017,2014,0.470850052,0.544886042,0.581479041,0.261763198,0.19600445,0.150353357,0.639647028,1.072012135,0.286113141,0.330034803,0.166058633,0.258704452,0.389529607,0.776524808,0.678537552,0.228588118,0.685592263,0.01577968,0.14828558,0.810956325,0.967567333,0.616851369,0.93930203,0.253454331,0.420166643,0.292136945,0.135898027,0.700975023,0.121874044,1.672534674,0.055162564,0.238647628,0.187144898,0.998032716,0.58254467,0.21158277,1.160448072,0.308727936,0.290385318,0.14346859,0.25870506,0.100208851,0.402664844,0.667710493,0.279189298,0.250732338,0.336440047,0.473983245,0.177456778,0.436396937,0.163697197,0.56259148,0.033304881,0.568112614,0.180145666,0.362307212,0.115227409,0.068344083,0.165225668,0.11142107,0.057286708,0.171733051,0.243164059,0.056098592,0.25819621,0.080581462,0.065918277,0.118803872,0.006967543,0.01466928,0.035405033,0.038955561,0.047911436,0.005951998,0.017977294,0.016930058,1.429485744,0.413752367,7.189993366,0.751142886,0.47944347,0.195730637,1.932137831,0.635955689,0.099004887,0.225315561,0.088684896,0.086835826,0.081042297,0.1266001,0.633508403,0.043888947,0.101034405,0.055006924,0.072881379,0.086781132,0.032966941,0.06997112,0.028765124,0.008865214,0.013819673,0.00813588,0.054755664,0.018903814,0.028740212,0.006614194
E09000018,2014,0.441349248,0.521136775,0.585154245,0.244954039,0.197011235,0.147776308,0.664429017,1.046503317,0.288552101,0.307735101,0.151944085,0.231676298,0.40211176,0.771247441,0.656788992,0.225033117,0.647344309,0.014536266,0.150742839,0.770937301,0.949711349,0.591531544,0.914853919,0.241609827,0.390969456,0.25287792,0.132667647,0.641874183,0.135879358,1.488750692,0.053536485,0.238493213,0.182180289,0.998612306,0.545782808,0.220175867,1.019582365,0.266174285,0.290281993,0.158837278,0.231472474,0.09490221,0.403791293,0.634608306,0.259688698,0.262029316,0.349385244,0.494323008,0.182392676,0.420630134,0.156800743,0.535927584,0.035563615,0.542007152,0.20470477,0.372022204,0.109855643,0.074009465,0.144358198,0.10328997,0.050677479,0.171619692,0.259179693,0.054578491,0.273458032,0.084891551,0.063274682,0.103800536,0.005452045,0.012289789,0.048926308,0.035910888,0.045565973,0.005725886,0.015430506,0.01424613,1.313531866,0.377366155,7.021227296,0.663179949,0.452342074,0.187111796,2.005281186,0.633396686,0.103854539,0.23000376,0.091438107,0.062751446,0.082200554,0.115136018,0.671325178,0.040713153,0.093390178,0.050304454,0.066506536,0.07887002,0.029117319,0.073899577,0.021996294,0.007419685,0.012987451,0.008736197,0.045895511,0.018660766,0.029052998,0.006767111
E09000019,2014,0.475561312,0.595272977,0.606139434,0.260085218,0.20155245,0.146763051,0.644515368,1.28243313,0.269913702,0.323595334,0.162840183,0.28715972,0.421557212,0.782682933,0.696756496,0.223070802,0.719951326,0.021430935,0.159526087,0.792241749,0.997180608,0.593843011,0.94782147,0.24982048,0.417154991,0.310422495,0.133251943,0.794761717,0.103053628,1.749674884,0.061135685,0.234538738,0.181078804,0.98986278,0.587486494,0.211055398,1.368932857,0.330197861,0.293001155,0.087889773,0.259241285,0.095159915,0.388701085,0.682636176,0.309022654,0.239192225,0.336345029,0.541321198,0.15956238,0.441413294,0.187758448,0.532016936,0.029271774,0.622187281,0.14841345,0.275141155,0.121858388,0.062262413,0.197205941,0.120880628,0.061949678,0.169017737,0.300217254,0.051006978,0.225938219,0.07460855,0.060261731,0.142564738,0.005596374,0.014547626,0.028355236,0.039028415,0.048432948,0.004392857,0.018964824,0.017892199,1.921912564,0.661612654,8.87520755,1.109872555,0.662709911,0.255226448,2.224883434,0.807413403,0.107306059,0.389061329,0.114802944,0.167878883,0.092575677,0.179377992,0.788204959,0.032738618,0.075463807,0.040860842,0.05404447,0.064319985,0.038128053,0.08625384,0.028805504,0.016922313,0.010324186,0.00995527,0.055058423,0.019740424,0.029231723,0.010447256
[truncated: 86,725 more chars]
